# Supplementary material for: Detection of condition-specific marker genes from RNA-seq data with MGFR
Source: PeerJ. 2019 May 27;7:e6970. doi: 10.7717/peerj.6970 (PMC6542349; doi:10.7717/peerj.6970)
Supplement: File S1 [file peerj-07-6970-s002.xlsx]

## Sheet: Blastocyst
sample_type	marker
Epiblast	NANOG
Epiblast	DPPA5
Epiblast	ETV4
Epiblast	FOXD3
Epiblast	GDF3
Epiblast	IL6R
Epiblast	LEFTY1
Epiblast	NODAL
Epiblast	POU5F1
Epiblast	PRDM14
Epiblast	SOX2
Epiblast	SPZ1
Epiblast	TDGF1
Epiblast	ZIC3
Epiblast	ZSCAN10
Primitive endoderm	GATA6
Primitive endoderm	FOXA2
Primitive endoderm	PDGFRA
Primitive endoderm	BMP6
Primitive endoderm	COL4A1
Primitive endoderm	COL18A1
Primitive endoderm	RSPO3
Primitive endoderm	CTSE
Primitive endoderm	FRZB
Primitive endoderm	TM6SF2
Primitive endoderm	GNA13
Primitive endoderm	ARL4C
Primitive endoderm	CAMK2D
Primitive endoderm	MAP2K6
Primitive endoderm	PIK3R1
Trophectoderm	CDX2
Trophectoderm	CLDN10
Trophectoderm	DAB2
Trophectoderm	EFNA1
Trophectoderm	FHL2
Trophectoderm	GATA2
Trophectoderm	GATA3
Trophectoderm	HIP1
Trophectoderm	HMGCS1
Trophectoderm	KRT18
Trophectoderm	KRT8
Trophectoderm	PLAC8
Trophectoderm	PPARG
Trophectoderm	TEAD3
Trophectoderm	TIPIN

## Sheet: Immune
sample_type	marker
B Cells	MS4A1
B Cells	CD79B
B Cells	CD79A
B Cells	CD22
B Cells	CD40
B Cells	CR2
B Cells	FCER2
B Cells	IGHM
B Cells	PAX5
B Cells	TNFRSF13B
CD4+ T Cells	CCR4
CD4+ T Cells	CCR10
CD4+ T Cells	CD40LG
CD4+ T Cells	ICOS
CD4+ T Cells	CD4
CD4+ T Cells	IFNGR1
CD4+ T Cells	CXCR3
CD4+ T Cells	CCR5
CD4+ T Cells	IL18R1
CD4+ T Cells	LTBR
CD4+ T Cells	HAVCR2
CD4+ T Cells	CCR3
CD4+ T Cells	CCR8
CD4+ T Cells	PTGDR2
CD4+ T Cells	HAVCR1
CD4+ T Cells	KLRB1
CD4+ T Cells	CCR6
CD4+ T Cells	CD84
CD4+ T Cells	IL6R
CD4+ T Cells	SLAMF1
CD4+ T Cells	CXCR5
CD4+ T Cells	TNFSF4
CD4+ T Cells	PDCD1
CD8+ T Cells	CD8
CD8+ T Cells	PTPRC
CD8+ T Cells	CCR7
CD8+ T Cells	CD28
Monocytes	CD14
Monocytes	CD33
Monocytes	FUT4
Monocytes	LRP1
Monocytes	CSF1R
Monocytes	PVR
Monocytes	CD163
Monocytes	MSR1
Monocytes	ADAM10
Monocytes	CD93
Neutrophils	MME
Neutrophils	ITGAX
Neutrophils	ANPEP
Neutrophils	FCGR3A
Neutrophils	FCGR2A
Neutrophils	SELL
Neutrophils	FCGR1A
Neutrophils	CEACAM8
Neutrophils	C5AR1
Neutrophils	CSF3R
Neutrophils	CXCR1
Neutrophils	CXCR2
Neutrophils	JAML
Neutrophils	TLR2
Neutrophils	ITGAM
NK Cells	KLRD1
NK Cells	KIR2DL1
NK Cells	KIR3DL1
NK Cells	NCAM1
NK Cells	CD244
NK Cells	GZMB
NK Cells	GNLY
NK Cells	PRF1
NK Cells	KLRK1

## Sheet: Tissues
sample_type	marker
Bone marrow	CD36
Bone marrow	COL1A2
Bone marrow	GALT
Bone marrow	PEX2
Bone marrow	TPMT
Bone marrow	ITGA2B
Bone marrow	EPX
Bone marrow	HBB
Bone marrow	MAN2B1
Bone marrow	CXCL8
Bone marrow	NCF4
Bone marrow	ITGAM
Bone marrow	RFX2
Bone marrow	ITGAX
Bone marrow	ITGB7
Bone marrow	NPR3
Bone marrow	RPL38
Bone marrow	RPL36AL
Bone marrow	LYRM5
Bone marrow	ATP5C1
Bone marrow	OR51B5
Bone marrow	RAB37
Bone marrow	SCP2
Bone marrow	PIK3R6
Bone marrow	HNRNPA1L2
Bone marrow	SGO1
Bone marrow	RPS9
Bone marrow	RPS27
Bone marrow	RPS29
Bone marrow	ADAM8
Bone marrow	ANGPT1
Bone marrow	ANXA6
Bone marrow	ARHGDIB
Bone marrow	CLCN7
Bone marrow	EEF1A1
Bone marrow	FYB
Bone marrow	EIF3E
Bone marrow	CAT
Bone marrow	CD37
Bone marrow	CD69
Bone marrow	CLC
Bone marrow	COL8A1
Bone marrow	CPA3
Bone marrow	CTGF
Bone marrow	EIF4E
Bone marrow	FN1
Bone marrow	FUT4
Bone marrow	GYPA
Bone marrow	GYPB
Bone marrow	H2AFZ
Bone marrow	HLA-DOA
Bone marrow	ICAM3
Bone marrow	ITGAL
Bone marrow	LIG3
Bone marrow	LMO1
Bone marrow	MAD2L1
Bone marrow	MYC
Bone marrow	NPM1
Bone marrow	PIK3CG
Bone marrow	PLEK
Bone marrow	PSMA4
Bone marrow	PTPN6
Bone marrow	RASA1
Bone marrow	RFC4
Bone marrow	RGS1
Bone marrow	S100A8
Bone marrow	S100A9
Bone marrow	SERPINB4
Bone marrow	SDHD
Bone marrow	SH3BP2
Bone marrow	SOX4
Bone marrow	SRP9
Bone marrow	SSB
Bone marrow	UBA7
Bone marrow	UBE2V2
Bone marrow	VRK1
Bone marrow	XRCC4
Bone marrow	HIST1H2BC
Bone marrow	HIST1H4C
Bone marrow	KCNAB2
Bone marrow	IFITM1
Bone marrow	CCNA1
Bone marrow	TIMM8A
Bone marrow	FCGRT
Bone marrow	FLT3
Bone marrow	CYTIP
Bone marrow	CAD
Bone marrow	COL12A1
Bone marrow	FRG1
Bone marrow	SP110
Bone marrow	NDUFB4
Bone marrow	PLCB2
Bone marrow	DIRAS3
Bone marrow	EIF1AY
Bone marrow	LPXN
Bone marrow	TBPL1
Bone marrow	ITM2A
Bone marrow	PRDX6
Bone marrow	JAK2
Bone marrow	LIMS1
Bone marrow	ABCC1
Bone marrow	NDUFA5
Bone marrow	NDUFA7
Bone marrow	MED12
Bone marrow	CLEC2B
Bone marrow	ANXA3
Bone marrow	CSF1R
Bone marrow	GFI1
Bone marrow	HAS2
Bone marrow	MYB
Bone marrow	IMPA1
Bone marrow	INPP5D
Bone marrow	LGALS3BP
Bone marrow	SSX1
Bone marrow	FARSB
Bone marrow	TOB1
Bone marrow	CNIH1
Bone marrow	BET1
Bone marrow	BCAS2
Bone marrow	TCIRG1
Bone marrow	SIRPB1
Bone marrow	MS4A3
Bone marrow	LYPLA1
Bone marrow	C1D
Bone marrow	TIMM17A
Bone marrow	EIF3M
Bone marrow	ATP5L
Bone marrow	RAD51AP1
Bone marrow	EVI2B
Bone marrow	IGF2BP3
Bone marrow	TSPAN9
Bone marrow	PNPLA6
Bone marrow	SLA
Bone marrow	PRDX3
Bone marrow	MLLT11
Bone marrow	ZNF185
Bone marrow	PDCD10
Bone marrow	EIF3K
Bone marrow	POLM
Bone marrow	CISH
Bone marrow	GREM1
Bone marrow	ADGRE2
Bone marrow	MRPL42
Bone marrow	HIGD1A
Bone marrow	MCTS1
Bone marrow	SMARCAL1
Bone marrow	MED4
Bone marrow	CRIPT
Bone marrow	C11orf58
Bone marrow	HEBP2
Bone marrow	KIAA0101
Bone marrow	CD302
Bone marrow	CARD8
Bone marrow	RBM34
Bone marrow	FCHO1
Bone marrow	STAB1
Bone marrow	SUZ12
Bone marrow	NIPSNAP3A
Bone marrow	ZNF385A
Bone marrow	C15orf39
Bone marrow	MMADHC
Bone marrow	TMA7
Bone marrow	TRAPPC12
Bone marrow	RBM7
Bone marrow	NIP7
Bone marrow	RHD
Bone marrow	RSL24D1
Bone marrow	IPO11
Bone marrow	CHMP5
Bone marrow	BIVM
Bone marrow	TTC27
Bone marrow	RNF31
Bone marrow	HELLS
Bone marrow	DPPA4
Bone marrow	ARHGAP15
Bone marrow	CISD1
Bone marrow	CBWD1
Bone marrow	CYCS
Bone marrow	SASH3
Bone marrow	APBB1IP
Bone marrow	IGLL1
Bone marrow	MRPL1
Bone marrow	ANKMY2
Bone marrow	RHCE
Bone marrow	ZNF286A
Bone marrow	CLK4
Bone marrow	VPS18
Bone marrow	SAMSN1
Bone marrow	CENPK
Bone marrow	TMEM135
Bone marrow	PCYOX1L
Bone marrow	SH3TC2
Bone marrow	VEPH1
Bone marrow	RIN3
Bone marrow	CPED1
Bone marrow	TMEM156
Bone marrow	ELL3
Bone marrow	TNKS2
Bone marrow	SERPINB1
Bone marrow	HMGN5
Bone marrow	FERMT3
Bone marrow	TATDN1
Bone marrow	FAM172A
Bone marrow	NIFK
Bone marrow	MRPL36
Bone marrow	ATG4C
Bone marrow	HSH2D
Bone marrow	FAM78A
Bone marrow	TADA1
Bone marrow	RGS18
Bone marrow	DEDD2
Bone marrow	SPTSSA
Bone marrow	PLD4
Bone marrow	GTSF1
Bone marrow	JCHAIN
Bone marrow	TMEM71
Bone marrow	IL23R
Bone marrow	TTC30A
Bone marrow	GORAB
Bone marrow	PYHIN1
Bone marrow	GAPT
Bone marrow	SNX20
Bone marrow	RASGRP2
Bone marrow	RASGRP4
Bone marrow	CBWD2
Bone marrow	CACNA2D4
Bone marrow	C4orf33
Bone marrow	TYSND1
Bone marrow	IQGAP3
Bone marrow	MRPL52
Bone marrow	WDR49
Bone marrow	LRRC70
Bone marrow	NCOA7
Bone marrow	TMEM173
Bone marrow	EMB
Bone marrow	MBLAC2
Bone marrow	CMPK2
Bone marrow	CD164L2
Brain	GH1
Brain	PLP1
Brain	CHRM1
Brain	CHRNA4
Brain	DBH
Brain	GABRA1
Brain	GABRA4
Brain	GABRA5
Brain	GABRA6
Brain	GABRD
Brain	GRIA1
Brain	GRIN1
Brain	GRIN2A
Brain	GRM2
Brain	GRM3
Brain	GRM5
Brain	PTGDR
Brain	GPM6B
Brain	CACNA1I
Brain	STUM
Brain	EVI2A
Brain	GPR179
Brain	DPP10
Brain	TTYH1
Brain	MOG
Brain	SEPT5
Brain	ERMN
Brain	NRG3
Brain	CLVS2
Brain	OPCML
Brain	ADCY8
Brain	ADCYAP1R1
Brain	CTNND2
Brain	ELAVL3
Brain	HCRTR1
Brain	AQP4
Brain	ADGRB1
Brain	ADGRB3
Brain	DRP2
Brain	GAP43
Brain	GFAP
Brain	KCNF1
Brain	KCNN1
Brain	KCNS1
Brain	LY6H
Brain	MAG
Brain	ADAM11
Brain	NPTX1
Brain	PCDH8
Brain	PMP2
Brain	PRKCG
Brain	PTPRZ1
Brain	RIT2
Brain	SLC6A1
Brain	SLIT1
Brain	SNAP25
Brain	SYN2
Brain	ICAM5
Brain	TNR
Brain	SEMA7A
Brain	CDR1
Brain	SLC1A2
Brain	NCAN
Brain	KCNQ2
Brain	NAP1L3
Brain	SCN2B
Brain	TMEM257
Brain	GPR37L1
Brain	OTOF
Brain	KCND1
Brain	KCNJ4
Brain	CNTN2
Brain	LGI1
Brain	PHOX2A
Brain	FOXG1
Brain	GPM6A
Brain	GPR17
Brain	MCHR1
Brain	GABBR2
Brain	INSL3
Brain	POU3F2
Brain	SOX3
Brain	OLIG2
Brain	APC2
Brain	MT3
Brain	ST8SIA2
Brain	CPNE6
Brain	TUBB4A
Brain	NRGN
Brain	OLFM1
Brain	C1orf61
Brain	RASL10A
Brain	CACNG3
Brain	CSPG5
Brain	TBR1
Brain	CYP46A1
Brain	RUNDC3A
Brain	SYN1
Brain	STMN2
Brain	TMEM59L
Brain	FAIM2
Brain	NTSR2
Brain	SLC6A11
Brain	IL1RAPL1
Brain	SULT4A1
Brain	KCNV1
Brain	SOX8
Brain	FAM131B
Brain	PHYHIP
Brain	PLPPR4
Brain	SLITRK3
Brain	RPH3A
Brain	HECW1
Brain	MLC1
Brain	FAM19A5
Brain	CHD5
Brain	LRRTM2
Brain	FAM135B
Brain	CAMK2A
Brain	HPCAL4
Brain	GPR83
Brain	CEND1
Brain	SLCO1C1
Brain	FEZF2
Brain	NODAL
Brain	SVOP
Brain	HMX1
Brain	SNTG1
Brain	NLGN3
Brain	NECAB2
Brain	DPYSL5
Brain	SHD
Brain	SLC17A7
Brain	PAK5
Brain	SLC24A2
Brain	PPP2R2C
Brain	KCNS2
Brain	UNC79
Brain	ISLR2
Brain	COL20A1
Brain	RFPL1
Brain	RTN1
Brain	BRINP2
Brain	CADM3
Brain	NGB
Brain	GALNT9
Brain	HAPLN2
Brain	BCAN
Brain	FXYD7
Brain	NEUROD6
Brain	COLEC11
Brain	GDAP1L1
Brain	CAMKV
Brain	PDYN
Brain	BAALC
Brain	MAP6D1
Brain	PAQR6
Brain	ATAT1
Brain	TRIM46
Brain	ZSCAN16
Brain	TMPRSS5
Brain	STMN4
Brain	PSD2
Brain	MEGF10
Brain	PDZD4
Brain	INSM2
Brain	CNDP1
Brain	PTPN5
Brain	ATCAY
Brain	OPALIN
Brain	RGS8
Brain	CNTNAP4
Brain	STX1B
Brain	KLHL32
Brain	SLITRK1
Brain	LRRC3B
Brain	C8orf34
Brain	NRSN1
Brain	NEU4
Brain	ASB16
Brain	CMTM5
Brain	OLIG1
Brain	SYNPR
Brain	RBM11
Brain	TTC9B
Brain	CCDC63
Brain	SLC10A4
Brain	AMER2
Brain	HEPACAM
Brain	SLC39A12
Brain	GPC2
Brain	NXPH1
Brain	C8orf46
Brain	NKAIN2
Brain	GPR26
Brain	CREG2
Brain	GABRG1
Brain	ZCCHC12
Brain	ZNF575
Brain	ZDHHC22
Brain	FAM181B
Brain	NKX6-2
Brain	TUBB2B
Brain	CBLN2
Brain	VSTM2A
Brain	SP8
Brain	ASIC4
Brain	MOBP
Brain	DRAXIN
Brain	BRINP3
Brain	ZNF365
Brain	FAM151B
Brain	C11orf87
Brain	FAM19A1
Heart	CD36
Heart	CDKN1C
Heart	CNGA1
Heart	SGCG
Heart	MYBPC3
Heart	MYH7
Heart	MYL3
Heart	SGCD
Heart	SNCA
Heart	TNNI3
Heart	TNNT2
Heart	TPM1
Heart	MYL2
Heart	HBG1
Heart	CXCL12
Heart	FOLR2
Heart	FAM109B
Heart	MYL4
Heart	GPATCH8
Heart	ATP5J
Heart	EBF3
Heart	ZNF766
Heart	TECRL
Heart	C10orf113
Heart	METTL21C
Heart	TRAPPC2
Heart	PLAC9
Heart	RYR2
Heart	ACTN2
Heart	AFP
Heart	CASQ2
Heart	TNFSF8
Heart	CST6
Heart	ELF5
Heart	EPB41L2
Heart	FABP4
Heart	GPC4
Heart	FHL1
Heart	FOXC1
Heart	HSPB2
Heart	AIF1
Heart	CD34
Heart	CDH2
Heart	CKMT2
Heart	DES
Heart	DPT
Heart	DSG1
Heart	GAS1
Heart	LGALS7B
Heart	LGALS7
Heart	MEST
Heart	MFAP2
Heart	MYF6
Heart	MYH3
Heart	MYH6
Heart	NDUFA2
Heart	NDUFB3
Heart	NDUFS4
Heart	NPPB
Heart	PCOLCE
Heart	SERPINB5
Heart	PLN
Heart	S100A3
Heart	S100A4
Heart	CCL21
Heart	SFRP1
Heart	SHOX2
Heart	SLN
Heart	TFF3
Heart	TNNC1
Heart	TTN
Heart	VLDLR
Heart	XPNPEP2
Heart	CSRP3
Heart	MFAP5
Heart	SORBS2
Heart	TP63
Heart	SOCS1
Heart	MYOM1
Heart	MYOM2
Heart	CASP5
Heart	RUNX1T1
Heart	COX6C
Heart	NEB
Heart	NREP
Heart	OMD
Heart	ACTC1
Heart	APLNR
Heart	CA3
Heart	CSTA
Heart	HBE1
Heart	MB
Heart	PPP1R3C
Heart	SULT1E1
Heart	SMAD7
Heart	KLHL41
Heart	KRT1
Heart	NPPA
Heart	DDR2
Heart	SRPX
Heart	HSPB3
Heart	NEBL
Heart	DNPH1
Heart	POSTN
Heart	WNT6
Heart	MIA
Heart	DMRT2
Heart	VAMP5
Heart	CBX1
Heart	PKIA
Heart	SPINK5
Heart	PRRX1
Heart	DNAJB4
Heart	ADAMTS5
Heart	LDB3
Heart	FSTL1
Heart	MMRN1
Heart	LAMB4
Heart	NID2
Heart	ITGB1BP2
Heart	PFDN2
Heart	FLRT2
Heart	SLC27A6
Heart	CD5
Heart	ADAMTS7
Heart	SMPX
Heart	FAM162A
Heart	ANKRD1
Heart	HSPB7
Heart	ABI3BP
Heart	EMCN
Heart	CENPF
Heart	COPZ2
Heart	MYOZ2
Heart	AHSP
Heart	HOXC13
Heart	ODAM
Heart	GSPT2
Heart	HHAT
Heart	NOP10
Heart	MIOS
Heart	LIN37
Heart	RHOJ
Heart	MIB1
Heart	SLC8A1
Heart	MYL7
Heart	LGR6
Heart	TMSB15A
Heart	POPDC2
Heart	KCTD15
Heart	CCDC28B
Heart	C1orf54
Heart	CXorf36
Heart	VASH2
Heart	SYNPO2L
Heart	SPHKAP
Heart	COL21A1
Heart	GLT8D2
Heart	MRPS24
Heart	TMEM126A
Heart	HSDL2
Heart	RSPO3
Heart	TRIM55
Heart	ZCCHC3
Heart	DMKN
Heart	EMILIN3
Heart	HTRA3
Heart	TWIST2
Heart	YBEY
Heart	ADAMTS14
Heart	SPSB4
Heart	LRRC15
Heart	C12orf57
Heart	MLIP
Heart	ADAMTS15
Heart	C1orf105
Heart	RMI2
Heart	TNFAIP8L1
Heart	MYOM3
Heart	MYZAP
Heart	SNRNP48
Heart	ZNF585A
Heart	NANP
Heart	CNPY4
Heart	RBM24
Heart	TXLNB
Heart	PI16
Heart	NMRK2
Heart	PSENEN
Heart	SPRR4
Heart	COL23A1
Heart	EEF1AKMT1
Heart	KRT74
Heart	KRT73
Heart	KRT25
Heart	KRT26
Heart	OLFML2A
Heart	XIRP1
Heart	LMOD3
Heart	SMYD1
Heart	NRK
Heart	SMTNL2
Heart	SVBP
Heart	FIBIN
Heart	COMMD6
Heart	GPR153
Heart	KRTDAP
Kidney	ARSE
Kidney	ASPA
Kidney	CLCNKB
Kidney	CYP17A1
Kidney	FUT6
Kidney	G6PC
Kidney	GLDC
Kidney	HGD
Kidney	ITGB3
Kidney	KCNJ1
Kidney	PAH
Kidney	PAX2
Kidney	PKLR
Kidney	PLG
Kidney	SLC12A1
Kidney	SLC12A3
Kidney	SLC2A2
Kidney	SLC3A1
Kidney	TGFBI
Kidney	CASR
Kidney	SLC10A2
Kidney	HNF4A
Kidney	HNF1B
Kidney	AQP2
Kidney	REN
Kidney	SPP1
Kidney	ADH6
Kidney	AVPR1A
Kidney	CYP27B1
Kidney	DDC
Kidney	DIO1
Kidney	FOLR3
Kidney	KNG1
Kidney	MME
Kidney	NPR3
Kidney	SERPINF2
Kidney	PTGER1
Kidney	PTGER2
Kidney	SLC2A9
Kidney	TRIM6
Kidney	TRIM6-TRIM34
Kidney	SLC6A19
Kidney	SLC30A2
Kidney	AK4
Kidney	HAO2
Kidney	SHISA2
Kidney	UMOD
Kidney	C10orf62
Kidney	ACSM2A
Kidney	SLC13A3
Kidney	SCNN1G
Kidney	SLC6A3
Kidney	SULT1C2
Kidney	UGT2B7
Kidney	VCAM1
Kidney	CUBN
Kidney	AFM
Kidney	ABCC6
Kidney	ENTPD5
Kidney	CD70
Kidney	DNAH5
Kidney	DPYS
Kidney	GATM
Kidney	ACADSB
Kidney	FXYD2
Kidney	BHMT
Kidney	BTC
Kidney	CKMT2
Kidney	DAO
Kidney	DPP4
Kidney	EGF
Kidney	EHHADH
Kidney	ENPEP
Kidney	FMO1
Kidney	HOXD10
Kidney	KCNJ15
Kidney	KLK1
Kidney	LFNG
Kidney	MSR1
Kidney	NDUFC1
Kidney	PCK1
Kidney	PDZK1
Kidney	PTPRB
Kidney	PTX3
Kidney	PVALB
Kidney	SALL1
Kidney	CCL4
Kidney	SLC5A2
Kidney	SLC34A1
Kidney	SLC22A2
Kidney	STC1
Kidney	TUB
Kidney	XPNPEP2
Kidney	ZFY
Kidney	PAX8
Kidney	SLC27A2
Kidney	KCNK5
Kidney	SLC4A4
Kidney	PEX11A
Kidney	PROZ
Kidney	NAT8
Kidney	TM4SF5
Kidney	SLC13A2
Kidney	BBOX1
Kidney	RHOB
Kidney	ARSF
Kidney	CDH16
Kidney	EMX1
Kidney	EMX2
Kidney	HABP2
Kidney	HNF4G
Kidney	SLC1A1
Kidney	SEMA3F
Kidney	SLC28A1
Kidney	SLC22A8
Kidney	GCSH
Kidney	GRB14
Kidney	HOXC6
Kidney	LRP2
Kidney	VNN1
Kidney	MGAM
Kidney	RGN
Kidney	SLC16A7
Kidney	SLC22A6
Kidney	KL
Kidney	GAL3ST1
Kidney	CALB1
Kidney	CDH6
Kidney	DNASE1L3
Kidney	ENPP3
Kidney	SLC17A1
Kidney	NR1I3
Kidney	NR1H4
Kidney	CEBPD
Kidney	DEFB1
Kidney	GPT
Kidney	MAF
Kidney	MYCL
Kidney	LHX1
Kidney	ALDH6A1
Kidney	PDZK1IP1
Kidney	GLYAT
Kidney	SLC23A1
Kidney	GZMA
Kidney	NFE2L2
Kidney	POU3F3
Kidney	PRKAA2
Kidney	DMRT2
Kidney	CLDN16
Kidney	SLC17A3
Kidney	FTCD
Kidney	SLC22A7
Kidney	FGL2
Kidney	HNMT
Kidney	HOXD3
Kidney	CLDN10
Kidney	ZNF81
Kidney	TREH
Kidney	STAP1
Kidney	HAVCR1
Kidney	TFEC
Kidney	PPARGC1A
Kidney	FLRT3
Kidney	DMGDH
Kidney	C11orf54
Kidney	KLF15
Kidney	CHMP4A
Kidney	HOXD9
Kidney	SLC7A9
Kidney	AMACR
Kidney	HIBCH
Kidney	TINAG
Kidney	DHDH
Kidney	ANGPTL3
Kidney	CARD10
Kidney	TFCP2L1
Kidney	HUNK
Kidney	HOXC4
Kidney	HOXD4
Kidney	NPHS2
Kidney	DZIP1
Kidney	CHRDL2
Kidney	METTL21B
Kidney	EMCN
Kidney	HSD17B14
Kidney	SGK2
Kidney	UPB1
Kidney	PIPOX
Kidney	SLC6A13
Kidney	NOX4
Kidney	MIOX
Kidney	BHMT2
Kidney	GIPC2
Kidney	KLHL28
Kidney	TRPM6
Kidney	LIME1
Kidney	ACSM5
Kidney	MARC2
Kidney	C14orf105
Kidney	OGDHL
Kidney	CHDH
Kidney	STK32B
Kidney	EAF2
Kidney	KCNJ16
Kidney	HOXC5
Kidney	RNF186
Kidney	HOXD8
Kidney	CLDN2
Kidney	ATP6V0A4
Kidney	TMEM27
Kidney	AS3MT
Kidney	KIAA1161
Kidney	HCN3
Kidney	GBA3
Kidney	NMB
Kidney	PRODH2
Kidney	ACE2
Kidney	CDHR5
Kidney	RBKS
Kidney	PBLD
Kidney	SLC13A1
Kidney	ALDH8A1
Kidney	LRRC19
Kidney	HOXB8
Kidney	HOXD1
Kidney	GALNT14
Kidney	PRKRIP1
Kidney	GRTP1
Kidney	IQCA1
Kidney	UGT2A3
Kidney	AGMAT
Kidney	ADGRF1
Kidney	SPX
Kidney	HOXA3
Kidney	NPL
Kidney	AMN
Kidney	ARHGAP24
Kidney	HSDL1
Kidney	SLC4A9
Kidney	RBP5
Kidney	AGXT2
Kidney	MRO
Kidney	FCAMR
Kidney	C2orf40
Kidney	IMMP2L
Kidney	PLA2G12B
Kidney	GPAT3
Kidney	TRIM55
Kidney	ATP23
Kidney	SLC26A7
Kidney	SLC5A11
Kidney	ALPK2
Kidney	CLNK
Kidney	HSPA12B
Kidney	ACY3
Kidney	GLYATL1
Kidney	FAM65C
Kidney	ATP6V1G3
Kidney	PANK1
Kidney	ACMSD
Kidney	HOGA1
Kidney	KIF12
Kidney	ZBED6CL
Kidney	MDP1
Kidney	PKHD1
Kidney	TM4SF18
Kidney	GALM
Kidney	CMBL
Kidney	SLC7A13
Kidney	L3HYPDH
Kidney	C9orf116
Kidney	SLC23A3
Kidney	IMMP1L
Kidney	SENP8
Kidney	SLC25A48
Kidney	SLC5A8
Kidney	FAM110B
Kidney	CLRN3
Kidney	MYOM3
Kidney	KLHDC7A
Kidney	UGT3A1
Kidney	AMDHD1
Kidney	ATP6V0D2
Kidney	LRRN4
Kidney	MUC20
Kidney	HOXA9
Kidney	NKAIN4
Kidney	CHST13
Kidney	SLC47A2
Kidney	TMEM52B
Kidney	TMEM174
Kidney	GGT6
Kidney	ENPP6
Kidney	TMEM139
Kidney	FXYD4
Kidney	UPP2
Kidney	PAPLN
Kidney	RNF152
Kidney	UNC5CL
Kidney	IGSF22
Kidney	SLC5A12
Kidney	ANO4
Kidney	C1orf64
Kidney	SLC51B
Kidney	SLCO4C1
Kidney	SLC36A2
Kidney	TMEM61
Kidney	ACSM2B
Kidney	CLEC18A
Kidney	WDR72
Kidney	SLC16A9
Kidney	PTGER3
Kidney	CLDN8
Kidney	IYD
Kidney	TMEM207
Kidney	CYP4V2
Kidney	FREM2
Kidney	BOLA3
Kidney	SLC16A12
Liver	A2M
Liver	NAT2
Liver	AGT
Liver	AGXT
Liver	ALAS2
Liver	ALDOB
Liver	APOA1
Liver	APOC3
Liver	APOH
Liver	ARG1
Liver	C3
Liver	C6
Liver	C8B
Liver	COL4A4
Liver	CYP2D6
Liver	EPB42
Liver	F11
Liver	F9
Liver	G6PC
Liver	GAMT
Liver	SERPIND1
Liver	CFH
Liver	HGD
Liver	KHK
Liver	LIPC
Liver	MTM1
Liver	MTTP
Liver	PAH
Liver	SERPINA1
Liver	PKLR
Liver	PLG
Liver	PROC
Liver	RHAG
Liver	SAA1
Liver	SLC2A2
Liver	SLC4A1
Liver	TAT
Liver	SERPINA7
Liver	APOB
Liver	ABCC2
Liver	HRG
Liver	KRT10
Liver	MAT1A
Liver	PON1
Liver	HNF4A
Liver	ALB
Liver	APOC4-APOC2
Liver	SERPINC1
Liver	F12
Liver	F2
Liver	FGA
Liver	FGG
Liver	RFXAP
Liver	C8A
Liver	CRP
Liver	IL1B
Liver	GC
Liver	C8G
Liver	ORM1
Liver	ORM2
Liver	HPX
Liver	SERPINA5
Liver	VTN
Liver	ABAT
Liver	ADH1A
Liver	ADH1B
Liver	ADH1C
Liver	ADH4
Liver	ADH6
Liver	ADRA1A
Liver	AGTR1
Liver	C4BPA
Liver	C4BPB
Liver	CYP2A6
Liver	CYP2A7
Liver	CYP3A7
Liver	CYP2B6
Liver	CYP2C8
Liver	CYP2C9
Liver	CYP2C18
Liver	CYP2E1
Liver	CYP2J2
Liver	CYP3A5
Liver	CYP7A1
Liver	DIO1
Liver	GSTA2
Liver	KLKB1
Liver	KNG1
Liver	SERPINF2
Liver	PON3
Liver	C14orf37
Liver	C4B
Liver	FMO3
Liver	HBM
Liver	HAO2
Liver	ACSM2A
Liver	TF
Liver	UGT2B10
Liver	CYP4F2
Liver	AADAC
Liver	AFM
Liver	AFP
Liver	ANG
Liver	AOX1
Liver	ASGR2
Liver	AZGP1
Liver	CES1
Liver	CPN1
Liver	AKR1C1
Liver	AKR1C2
Liver	DPYS
Liver	DUSP9
Liver	FABP1
Liver	FMO5
Liver	FZD2
Liver	GAGE2A
Liver	GAGE12F
Liver	GAGE12G
Liver	GATM
Liver	ACADSB
Liver	AHSG
Liver	AMBP
Liver	APCS
Liver	APOA2
Liver	APOC1
Liver	APOC4
Liver	AREG
Liver	ASGR1
Liver	BAAT
Liver	CFB
Liver	BHMT
Liver	C5
Liver	C9
Liver	SERPINA6
Liver	AKR1C4
Liver	COX5B
Liver	CPB2
Liver	CPS1
Liver	CRYZ
Liver	CTH
Liver	CYB5A
Liver	EHHADH
Liver	F13B
Liver	CXCL2
Liver	HAL
Liver	CFHR1
Liver	HPD
Liver	HPN
Liver	ITIH1
Liver	ITIH2
Liver	ITIH3
Liver	ITIH4
Liver	LECT2
Liver	MYBPC1
Liver	PCSK6
Liver	PLGLB2
Liver	PZP
Liver	RNASE4
Liver	CXCL6
Liver	SLC10A1
Liver	SLC22A1
Liver	SPTA1
Liver	SULT2A1
Liver	TFR2
Liver	RDH16
Liver	HSD17B6
Liver	AKR1C3
Liver	NR5A2
Liver	IL18R1
Liver	NR1I2
Liver	PROZ
Liver	HABP2
Liver	LBP
Liver	GFI1B
Liver	CHST3
Liver	FGL1
Liver	TM4SF4
Liver	CRLF1
Liver	DNASE1L3
Liver	GPR183
Liver	NR5A1
Liver	NR1I3
Liver	NR1H4
Liver	FGB
Liver	HP
Liver	HBZ
Liver	SEPP1
Liver	FOSL1
Liver	HMGCS2
Liver	INHBC
Liver	TDO2
Liver	CFHR2
Liver	DHRS2
Liver	RIDA
Liver	GLYAT
Liver	NBR1
Liver	MT1G
Liver	MT1H
Liver	AKR1D1
Liver	CD7
Liver	NEDD4
Liver	NNMT
Liver	SERPINA4
Liver	PNLIPRP1
Liver	COLEC10
Liver	SLCO1B1
Liver	POLR3G
Liver	SAA4
Liver	MASP2
Liver	SLC22A7
Liver	RBP4
Liver	TRIM10
Liver	SDS
Liver	SPP2
Liver	ABHD2
Liver	VIL1
Liver	ZXDB
Liver	C4A
Liver	FRAT2
Liver	NEK1
Liver	SLC27A5
Liver	PPARGC1A
Liver	DMGDH
Liver	SPANXA1
Liver	RAB26
Liver	FETUB
Liver	ANGPTL3
Liver	A1CF
Liver	KIAA1429
Liver	SERPINA10
Liver	UPB1
Liver	DCDC2
Liver	PIPOX
Liver	IL1RAPL2
Liver	CYP3A4
Liver	HAO1
Liver	BHMT2
Liver	KCTD9
Liver	ACSM5
Liver	SLC38A4
Liver	EBLN2
Liver	HEMGN
Liver	ANGPTL8
Liver	GNMT
Liver	APOM
Liver	SLCO1B3
Liver	AQP9
Liver	HPR
Liver	MST1
Liver	CFHR3
Liver	UGT2B4
Liver	GYS2
Liver	NR0B2
Liver	SLC22A3
Liver	PBLD
Liver	ALDH8A1
Liver	CYP3A43
Liver	ZNF426
Liver	ACSS3
Liver	KDM8
Liver	RMI1
Liver	SAA2
Liver	SLC25A18
Liver	AGXT2
Liver	BCO2
Liver	HPS3
Liver	MYPN
Liver	AJUBA
Liver	SEC16B
Liver	SLC18B1
Liver	LEAP2
Liver	LRG1
Liver	ABCA9
Liver	A1BG
Liver	UROC1
Liver	HFE2
Liver	SPANXA2
Liver	GSTA1
Liver	CLRN3
Liver	XIRP2
Liver	OIT3
Liver	MAP7D2
Liver	TMPRSS6
Liver	SLC13A5
Liver	OAF
Liver	ACSM2B
Liver	IDO2
Liver	KCNT2
Liver	SLC25A47
Liver	ZNF517
Lung	TBX5
Lung	NR0B1
Lung	SFTPB
Lung	ADH7
Lung	CSF2
Lung	CYP4B1
Lung	DRD2
Lung	HTR3A
Lung	QSOX1
Lung	DAZ4
Lung	SLC35D3
Lung	MEIS3
Lung	LECT1
Lung	XKR7
Lung	GRP
Lung	AGER
Lung	AKR1C2
Lung	FMO2
Lung	DBT
Lung	GABRR1
Lung	INSM1
Lung	KCNA4
Lung	SH2D1A
Lung	MRC1
Lung	SCTR
Lung	CCL18
Lung	CXCL5
Lung	SFTPC
Lung	SFTPD
Lung	T
Lung	NKX2-1
Lung	SCGB1A1
Lung	WNT9A
Lung	FGF18
Lung	DAZ1
Lung	FGF14
Lung	TPH1
Lung	GLP2R
Lung	ASCL1
Lung	NAPSA
Lung	GPR4
Lung	NHLH1
Lung	IRX5
Lung	SIX1
Lung	SOX1
Lung	TBX1
Lung	TSC22D1
Lung	H1FX
Lung	CACNG2
Lung	CCL19
Lung	PPP1R17
Lung	INMT
Lung	ADAMTS8
Lung	BVES
Lung	TRH
Lung	LAMP3
Lung	BRI3
Lung	ASB4
Lung	ATP8A2
Lung	BPIFA1
Lung	AKR1B10
Lung	GPR84
Lung	DNASE2B
Lung	CHST6
Lung	FOXA2
Lung	IRX6
Lung	PLEKHS1
Lung	PBX4
Lung	MS4A8
Lung	OTP
Lung	KIRREL2
Lung	CFC1
Lung	HSPB9
Lung	CAMK2N2
Lung	SCGB3A1
Lung	SCGB3A2
Lung	DUOXA1
Lung	CAPSL
Lung	ZNF564
Lung	RASGEF1B
Lung	ZNF709
Lung	CDHR3
Lung	ZFPM1
Lung	TDRD5
Lung	RIMKLA
Lung	MCEMP1
Lung	SEC14L3
Lung	AGR3
Lung	GPIHBP1
Lung	SLC46A3
Lung	CCDC129
Lung	GOLGA6L9
Lung	RBM43
Lung	ADAMTS18
Lung	SPAG17
Lung	ZNF467
Lymph node	BLM
Lymph node	BRCA2
Lymph node	BTK
Lymph node	JAK3
Lymph node	CIITA
Lymph node	NCF1
Lymph node	WAS
Lymph node	CYBB
Lymph node	CD53
Lymph node	CR1
Lymph node	CD79B
Lymph node	SELL
Lymph node	ADORA2A
Lymph node	ALOX5
Lymph node	HTR3A
Lymph node	ITGAX
Lymph node	PTGER4
Lymph node	DDI1
Lymph node	CENPM
Lymph node	CLEC2D
Lymph node	SP140
Lymph node	CR2
Lymph node	APOBEC3F
Lymph node	DEPDC5
Lymph node	GEMIN2
Lymph node	PM20D2
Lymph node	HACD4
Lymph node	BCAS4
Lymph node	ZAP70
Lymph node	ALDH5A1
Lymph node	ADPRH
Lymph node	BIRC3
Lymph node	TNFRSF17
Lymph node	BIK
Lymph node	CD27
Lymph node	TNFSF8
Lymph node	CD40
Lymph node	DNMT1
Lymph node	IL10RA
Lymph node	BLK
Lymph node	CXCR5
Lymph node	CD19
Lymph node	CD22
Lymph node	CD37
Lymph node	CD38
Lymph node	CD48
Lymph node	CD72
Lymph node	CD79A
Lymph node	CDK1
Lymph node	CENPE
Lymph node	CNR2
Lymph node	E2F5
Lymph node	FCER2
Lymph node	HLA-DOA
Lymph node	HLA-DOB
Lymph node	HLA-DPB1
Lymph node	HLA-DQB1
Lymph node	HLA-DRB1
Lymph node	IRF8
Lymph node	ISG20
Lymph node	ITGAL
Lymph node	ITPKB
Lymph node	KCNN3
Lymph node	LCP1
Lymph node	LSP1
Lymph node	LTB
Lymph node	LY9
Lymph node	LY75
Lymph node	MFNG
Lymph node	PLCG2
Lymph node	PLEK
Lymph node	POU2F1
Lymph node	POU2F2
Lymph node	PRKCB
Lymph node	PTPN7
Lymph node	PTPRC
Lymph node	RAC2
Lymph node	REL
Lymph node	RGS13
Lymph node	SBF1
Lymph node	ST6GAL1
Lymph node	SLAMF1
Lymph node	SLC2A5
Lymph node	SPI1
Lymph node	SPIB
Lymph node	SYK
Lymph node	TCF3
Lymph node	TEC
Lymph node	WIPF1
Lymph node	STX11
Lymph node	S1PR4
Lymph node	BCL2A1
Lymph node	PTK2B
Lymph node	STK17B
Lymph node	CD83
Lymph node	LY86
Lymph node	CYTIP
Lymph node	RHOH
Lymph node	RUNX3
Lymph node	CD74
Lymph node	DTX1
Lymph node	IL16
Lymph node	KDM5D
Lymph node	RASAL1
Lymph node	VNN2
Lymph node	ANGPTL1
Lymph node	AIM2
Lymph node	EIF2AK3
Lymph node	ENTPD4
Lymph node	TCL1B
Lymph node	PIK3CD
Lymph node	RBBP5
Lymph node	ZRSR2
Lymph node	ATP2A3
Lymph node	HCLS1
Lymph node	NCKAP1L
Lymph node	LCK
Lymph node	FCMR
Lymph node	SH2D3C
Lymph node	INPP5B
Lymph node	INPP5D
Lymph node	ITK
Lymph node	CD180
Lymph node	LYL1
Lymph node	PTPRCAP
Lymph node	RASGRP1
Lymph node	BORCS8-MEF2B
Lymph node	KMT2A
Lymph node	IKZF1
Lymph node	TLR6
Lymph node	LRMP
Lymph node	NFATC1
Lymph node	PIK3CA
Lymph node	PNOC
Lymph node	POU2AF1
Lymph node	POLH
Lymph node	GLRA3
Lymph node	GRAP
Lymph node	CYSLTR1
Lymph node	LILRB1
Lymph node	MALT1
Lymph node	IL24
Lymph node	WASF2
Lymph node	CNTRL
Lymph node	CORO1A
Lymph node	LSM6
Lymph node	TFEB
Lymph node	MAP4K1
Lymph node	WHSC1
Lymph node	STAP1
Lymph node	ARHGAP45
Lymph node	NFATC2
Lymph node	STAG3
Lymph node	PSD4
Lymph node	ATP6V0A2
Lymph node	SLC30A4
Lymph node	BLNK
Lymph node	ANAPC2
Lymph node	VPREB3
Lymph node	IKBKE
Lymph node	LAT2
Lymph node	ADAM28
Lymph node	ZNF318
Lymph node	CYFIP2
Lymph node	DAPP1
Lymph node	SIT1
Lymph node	RAB30
Lymph node	FAM53B
Lymph node	HDAC9
Lymph node	RASSF2
Lymph node	NLRP1
Lymph node	DENND3
Lymph node	CARD8
Lymph node	FNBP1
Lymph node	GGA2
Lymph node	RRP1B
Lymph node	FCHO1
Lymph node	SEPT6
Lymph node	PASK
Lymph node	RFTN1
Lymph node	TBC1D1
Lymph node	SEL1L3
Lymph node	KIAA0922
Lymph node	GLTSCR1L
Lymph node	PPP1R16B
Lymph node	CCDC69
Lymph node	FAM65B
Lymph node	UBE2J1
Lymph node	ABI3
Lymph node	MZB1
Lymph node	PAX5
Lymph node	FZD3
Lymph node	TLR9
Lymph node	MCUB
Lymph node	MARCH1
Lymph node	BANK1
Lymph node	BCL11A
Lymph node	ASPM
Lymph node	RAVER2
Lymph node	FGD6
Lymph node	MIS18BP1
Lymph node	PAG1
Lymph node	SASH3
Lymph node	TNRC6C
Lymph node	APBB1IP
Lymph node	HLA-DRA
Lymph node	HLA-DQA2
Lymph node	LPAR5
Lymph node	CHRNA10
Lymph node	TTC7A
Lymph node	AICDA
Lymph node	CPNE5
Lymph node	SH2B2
Lymph node	IL21R
Lymph node	BACH2
Lymph node	APOBEC3G
Lymph node	MS4A1
Lymph node	TCL1A
Lymph node	HLA-DRB4
Lymph node	SLC17A9
Lymph node	PRDM15
Lymph node	HLA-DRB3
Lymph node	EBF1
Lymph node	ZBED2
Lymph node	NEIL1
Lymph node	MSANTD2
Lymph node	LRRK1
Lymph node	PALB2
Lymph node	TREML2
Lymph node	DOK3
Lymph node	COQ8B
Lymph node	TMEM156
Lymph node	RUBCNL
Lymph node	PDGFD
Lymph node	TRAF3IP3
Lymph node	FCRL2
Lymph node	AKNA
Lymph node	TLR10
Lymph node	FCRL5
Lymph node	FCRL4
Lymph node	FERMT3
Lymph node	SETDB2
Lymph node	GSG2
Lymph node	MND1
Lymph node	RHBDD1
Lymph node	HVCN1
Lymph node	CARD11
Lymph node	KBTBD8
Lymph node	SLC9A7
Lymph node	MYO18B
Lymph node	IRF5
Lymph node	CRACR2A
Lymph node	FCRLA
Lymph node	HSH2D
Lymph node	MYO1G
Lymph node	HLA-DPA1
Lymph node	SEPT1
Lymph node	RCSD1
Lymph node	TIFA
Lymph node	SLAMF6
Lymph node	FCRL1
Lymph node	FCRL3
Lymph node	TAGAP
Lymph node	GAB3
Lymph node	KLHL6
Lymph node	MOB3A
Lymph node	GSX2
Lymph node	GNPDA2
Lymph node	SAMD1
Lymph node	PCED1B
Lymph node	WDR92
Lymph node	BCL2L12
Lymph node	PLD4
Lymph node	SUSD3
Lymph node	NLRP11
Lymph node	SMC1B
Lymph node	PNPLA7
Lymph node	PIK3AP1
Lymph node	TMC8
Lymph node	CKAP2L
Lymph node	SGO2
Lymph node	BTNL9
Lymph node	DCP2
Lymph node	GCSAM
Lymph node	SNX20
Lymph node	ANKRD44
Lymph node	ADGRF3
Lymph node	ADGRG5
Lymph node	RASGRP3
Lymph node	ELF1
Lymph node	TRIM59
Lymph node	C18orf54
Lymph node	FAM129C
Lymph node	SERPINA9
Lymph node	RASSF6
Lymph node	P2RY8
Lymph node	GATS
Lymph node	NLRC3
Lymph node	ARHGAP30
Lymph node	SPRED2
Lymph node	GEN1
Lymph node	CLDN23
Lymph node	TERT
Lymph node	EMB
Lymph node	C3orf67
Lymph node	TBC1D10C
Lymph node	FAM111B
Lymph node	MDFIC
Lymph node	DOCK8
Lymph node	SCIMP
Lymph node	XKRX
Lymph node	TMED8
Prostate	AR
Prostate	LCAT
Prostate	SRD5A2
Prostate	PSEN2
Prostate	AQP2
Prostate	HOXA13
Prostate	IGF1
Prostate	CYP24A1
Prostate	KCNJ5
Prostate	NPY
Prostate	PTGFR
Prostate	PTGS2
Prostate	RPL39
Prostate	PDE9A
Prostate	ANO7
Prostate	KLK2
Prostate	TMEM220
Prostate	POTEG
Prostate	NWD1
Prostate	ZNF761
Prostate	TDRD6
Prostate	ACPP
Prostate	ALOX15B
Prostate	AZGP1
Prostate	BMPR1B
Prostate	DNAH5
Prostate	ING2
Prostate	ACTG2
Prostate	KLK3
Prostate	CTSG
Prostate	EPHX2
Prostate	FCER1A
Prostate	MSMB
Prostate	MST1R
Prostate	MYH11
Prostate	PAEP
Prostate	PIP
Prostate	SATB1
Prostate	SEMG1
Prostate	SEMG2
Prostate	XCL2
Prostate	TGM4
Prostate	SCGB1A1
Prostate	ZNF35
Prostate	HIST1H4H
Prostate	ITGA8
Prostate	TNFRSF10D
Prostate	FOLH1
Prostate	FOXA1
Prostate	SULT2B1
Prostate	KLK4
Prostate	NME4
Prostate	CSTA
Prostate	TMPRSS2
Prostate	PSCA
Prostate	MPHOSPH10
Prostate	ABCC4
Prostate	ARHGAP6
Prostate	NKX3-1
Prostate	PCP4
Prostate	HOXB13
Prostate	RLN1
Prostate	UPK3A
Prostate	PAGE4
Prostate	CYP4F8
Prostate	LPAR3
Prostate	STEAP1
Prostate	SLC30A4
Prostate	HOXD9
Prostate	AMACR
Prostate	SLC39A2
Prostate	TSC22D2
Prostate	DOCK9
Prostate	GLTSCR1
Prostate	SLC14A1
Prostate	RDH11
Prostate	TMEFF2
Prostate	OPLAH
Prostate	ARHGEF38
Prostate	ATP5SL
Prostate	PCDHB13
Prostate	PCDHB8
Prostate	CD177
Prostate	SCUBE2
Prostate	NEFH
Prostate	LMAN1L
Prostate	DLK2
Prostate	C1orf116
Prostate	TRPM8
Prostate	ZNF552
Prostate	ZNF613
Prostate	GRHL2
Prostate	EDC3
Prostate	EPC1
Prostate	S1PR5
Prostate	OR51E2
Prostate	WNT5B
Prostate	EMILIN2
Prostate	PRAC1
Prostate	FAM83A
Prostate	SLC45A3
Prostate	SLC26A7
Prostate	SCGB3A1
Prostate	CPNE4
Prostate	PATE1
Prostate	KCNC2
Prostate	TTC8
Prostate	SLC2A12
Prostate	ZG16B
Prostate	DNAJC19
Prostate	LRR1
Prostate	POC5
Prostate	OR51E1
Prostate	SPRR4
Prostate	TRAPPC6B
Prostate	FUOM
Prostate	TEPP
Prostate	PLA2G4F
Spleen	ALAS2
Spleen	ALDOB
Spleen	ANK1
Spleen	APOA1
Spleen	APOC3
Spleen	GAA
Spleen	HBG2
Spleen	ITGB2
Spleen	SPTB
Spleen	APOB
Spleen	PAFAH2
Spleen	ALB
Spleen	C1QB
Spleen	ELN
Spleen	HBA2
Spleen	HBB
Spleen	VWF
Spleen	HBA1
Spleen	HBG1
Spleen	CD53
Spleen	CXCL12
Spleen	CD3E
Spleen	IL2RB
Spleen	PARVB
Spleen	RPS6KA1
Spleen	TNFRSF1B
Spleen	VCAM1
Spleen	AFP
Spleen	CD27
Spleen	CTSW
Spleen	APOA2
Spleen	BGN
Spleen	CCND3
Spleen	CD19
Spleen	FCER2
Spleen	HLA-C
Spleen	HLA-DPB1
Spleen	HLA-DQB1
Spleen	HLA-DRB5
Spleen	HMOX1
Spleen	IRF1
Spleen	ITIH2
Spleen	LSP1
Spleen	LTB
Spleen	LYN
Spleen	CDK17
Spleen	PDE2A
Spleen	CFP
Spleen	PSMB9
Spleen	PTPN7
Spleen	CXCL6
Spleen	SELPLG
Spleen	STAT3
Spleen	UCP2
Spleen	VASP
Spleen	CST7
Spleen	RNASET2
Spleen	MYO9B
Spleen	GFI1B
Spleen	CALD1
Spleen	CD74
Spleen	NKX2-5
Spleen	FOLH1
Spleen	THEMIS2
Spleen	AQP3
Spleen	NR5A1
Spleen	MMP9
Spleen	FGR
Spleen	GRK5
Spleen	HBE1
Spleen	HCLS1
Spleen	PRKCE
Spleen	P2RX6
Spleen	FCMR
Spleen	HLA-E
Spleen	CD5L
Spleen	ZBTB16
Spleen	TRIM22
Spleen	CD7
Spleen	TLN1
Spleen	SPTLC1
Spleen	CXCL13
Spleen	LILRB1
Spleen	LAPTM5
Spleen	LILRB5
Spleen	PIM2
Spleen	CORO1A
Spleen	TMC6
Spleen	MYO1F
Spleen	CYTH4
Spleen	MYBBP1A
Spleen	PPP1R16B
Spleen	C1QA
Spleen	PRKD2
Spleen	AHSP
Spleen	A4GALT
Spleen	GDPD2
Spleen	SSH3
Spleen	HEMGN
Spleen	HLA-F
Spleen	ROBO4
Spleen	LPAR5
Spleen	PREX1
Spleen	RNF213
Spleen	SCPEP1
Spleen	HLA-DRB4
Spleen	GPSM3
Spleen	HLA-DRB3
Spleen	RIN3
Spleen	DENND1C
Spleen	KIAA1683
Spleen	PLVAP
Spleen	AIF1L
Spleen	RBP5
Spleen	HVCN1
Spleen	MAML2
Spleen	FAM120B
Spleen	GNG7
Spleen	PIK3IP1
Spleen	EMID1
Spleen	CCDC124
Spleen	CCNY
Spleen	IL34
Spleen	C1QC
Spleen	OXR1
Spleen	RASSF5
Spleen	ARHGAP27
Testis	BRCA2
Testis	HSD17B3
Testis	ANOS1
Testis	NPHP1
Testis	EGR2
Testis	KEL
Testis	RAG1
Testis	UGT1A1
Testis	RAG2
Testis	SERPINA5
Testis	IL13RA2
Testis	ADORA3
Testis	GSTA2
Testis	HTR2C
Testis	C16orf87
Testis	LEMD1
Testis	DDI1
Testis	CC2D2B
Testis	TPD52L3
Testis	WNK3
Testis	ERICH3
Testis	TSPYL6
Testis	DYRK3
Testis	GRK4
Testis	C7orf61
Testis	STPG3
Testis	OR4N4
Testis	C8orf48
Testis	KLHDC9
Testis	NKAPL
Testis	C1QTNF9B
Testis	REG3G
Testis	TTLL9
Testis	AKAP14
Testis	TMCO2
Testis	SPDYA
Testis	GTSF1L
Testis	ACSL6
Testis	MFAP3L
Testis	CADPS2
Testis	ARHGAP28
Testis	SHE
Testis	TDRD6
Testis	C9orf135
Testis	SAMD13
Testis	ROPN1B
Testis	TRIM61
Testis	FAM71F2
Testis	DUSP15
Testis	FAM209A
Testis	UGT1A6
Testis	ART3
Testis	DAZL
Testis	DNAH5
Testis	DNAH9
Testis	ADAM2
Testis	GAGE2A
Testis	GAGE12F
Testis	GAGE12G
Testis	GTF2H3
Testis	IGSF1
Testis	ACRV1
Testis	BNC1
Testis	BRDT
Testis	GNA15
Testis	KPNA5
Testis	LDHC
Testis	MSH4
Testis	NEK2
Testis	PIK3CG
Testis	PRM1
Testis	PRM2
Testis	SH3GL3
Testis	SLC2A5
Testis	SLC5A2
Testis	SYCP1
Testis	TNP1
Testis	TPP2
[truncated: 501 more rows]
