# Supplementary material for: Detection of condition-specific marker genes from RNA-seq data with MGFR
Source: PeerJ. 2019 May 27;7:e6970. doi: 10.7717/peerj.6970 (PMC6542349; doi:10.7717/peerj.6970)
Supplement: File S2 [file peerj-07-6970-s003.xlsx]

## Sheet: Blastocyst
sample_type	predicted_marker	specificity_score	reported_marker
Epiblast	KHDC3L	0.0349	0
Epiblast	NANOG	0.1264	1
Epiblast	POU5F1	0.43	1
Primitive endoderm	NID2	0.0376	0
Primitive endoderm	RSPO3	0.0427	1
Primitive endoderm	CDH2	0.0435	0
Primitive endoderm	COL18A1	0.0682	1
Primitive endoderm	BMP2	0.0841	0
Primitive endoderm	COL4A2	0.0884	0
Primitive endoderm	PDGFRA	0.1022	1
Primitive endoderm	CA4	0.1028	0
Primitive endoderm	SMLR1	0.1222	0
Primitive endoderm	LGALS2	0.1418	0
Primitive endoderm	DPP4	0.1506	0
Primitive endoderm	FN1	0.2738	0
Primitive endoderm	APOA1	0.2838	0
Primitive endoderm	HNF4A	0.3607	0
Trophectoderm	ABHD8	0	0
Trophectoderm	AK7	0	0
Trophectoderm	AQP11	0	0
Trophectoderm	B3GNT5	0	0
Trophectoderm	BOK-AS1	0	0
Trophectoderm	C1orf61	0	0
Trophectoderm	C4BPB	0	0
Trophectoderm	CA12	0	0
Trophectoderm	CHKA	0	0
Trophectoderm	CXorf23	0	0
Trophectoderm	FRMD4A	0	0
Trophectoderm	HAPLN1	0	0
Trophectoderm	LENG1	0	0
Trophectoderm	LRWD1	0	0
Trophectoderm	NIM1	0	0
Trophectoderm	PPP1R13L	0	0
Trophectoderm	SLC7A4	0	0
Trophectoderm	STXBP4	0	0
Trophectoderm	TFAP2A	0	0
Trophectoderm	TMEM241	0	0
Trophectoderm	TMEM62	0	0
Trophectoderm	TP63	0	0
Trophectoderm	TPD52L1	0	0
Trophectoderm	TRDMT1	0	0
Trophectoderm	TTC7B	0	0
Trophectoderm	VGLL1	0	0
Trophectoderm	VGLL4	0	0
Trophectoderm	WDR24	0	0
Trophectoderm	CDKN1A	0.0057	0
Trophectoderm	MORC2	0.0064	0
Trophectoderm	ODAM	0.0068	0
Trophectoderm	PTGES	0.0153	0
Trophectoderm	STEAP3	0.0169	0
Trophectoderm	TMEM57	0.0322	0
Trophectoderm	RXRA	0.0377	0
Trophectoderm	EPB41L3	0.0486	0
Trophectoderm	FBRSL1	0.0503	0
Trophectoderm	SLC38A1	0.0803	0
Trophectoderm	APOA1BP	0.1047	0
Trophectoderm	CLDN4	0.2272	0
Trophectoderm	SLC7A2	0.2699	0
Trophectoderm	GATA3	0.2955	1

## Sheet: Immune
sample_type	predicted_marker	specificity_score	reported_marker
B cells	WNT16	0	0
B cells	KCNG1	0	0
B cells	TNFRSF17	0	0
B cells	RIMBP2	0	0
B cells	MAP2	0	0
B cells	COL19A1	0	0
B cells	MYBPC2	0	0
B cells	DAZL	0	0
B cells	NFATC4	0	0
B cells	FA2H	0	0
B cells	CORO2B	0	0
B cells	SIGLEC6	0	0
B cells	STEAP1B	0	0
B cells	BHLHE41	0	0
B cells	FFAR1	0	0
B cells	SGCE	0	0
B cells	VPREB3	0	0
B cells	TBC1D27P	0	0
B cells	SMO	0	0
B cells	FCRLA	0	0
B cells	CHL1	0	0
B cells	SOX5	0	0
B cells	HRK	0	0
B cells	IL6	0	0
B cells	SLCO5A1	0	0
B cells	ARHGAP20	0	0
B cells	ESPNL	0	0
B cells	LIX1	0	0
B cells	SYBU	0	0
B cells	THRB	0	0
B cells	SCN3A	0	0
B cells	ENAH	0	0
B cells	FAM81A	0	0
B cells	SNX29P1	0	0
B cells	EBF1	0	0
B cells	NKX6-3	0	0
B cells	BTNL9	0	0
B cells	NETO1	0	0
B cells	HTR3A	0	0
B cells	PPP1R14A	0	0
B cells	SLC38A11	0	0
B cells	DIRAS1	0	0
B cells	KCNH8	0	0
B cells	SYN3	0	0
B cells	C12orf74	0	0
B cells	PLEKHG7	0	0
B cells	LCN10	0	0
B cells	COLCA1	0	0
B cells	ZNF860	0	0
B cells	PRAMENP	0	0
B cells	KLHL14	0	0
B cells	LCN8	0	0
B cells	PKHD1L1	0	0
B cells	IGKC	0	0
B cells	IGKJ5	0	0
B cells	IGKJ4	0	0
B cells	IGKJ3	0	0
B cells	IGKV5-2	0	0
B cells	IGKV3D-20	0	0
B cells	IGLV4-69	0	0
B cells	IGLV8-61	0	0
B cells	IGLV6-57	0	0
B cells	IGLV1-47	0	0
B cells	IGLV7-46	0	0
B cells	IGLV5-45	0	0
B cells	IGLV1-44	0	0
B cells	IGLV7-43	0	0
B cells	IGLV1-40	0	0
B cells	IGLV1-36	0	0
B cells	IGLV3-27	0	0
B cells	IGLV3-25	0	0
B cells	IGLV2-23	0	0
B cells	IGLV3-21	0	0
B cells	IGLV3-19	0	0
B cells	IGLV2-18	0	0
B cells	IGLV3-16	0	0
B cells	IGLC1	0	0
B cells	IGLC3	0	0
B cells	IGHG3	0	0
B cells	IGHJ6	0	0
B cells	IGHD3-9	0	0
B cells	IGHV6-1	0	0
B cells	IGHV1-3	0	0
B cells	IGHV2-5	0	0
B cells	IGHV3-7	0	0
B cells	IGHV3-11	0	0
B cells	IGHV3-13	0	0
B cells	IGHV3-15	0	0
B cells	IGHV1-18	0	0
B cells	IGHV3-20	0	0
B cells	IGHV3-21	0	0
B cells	IGHV3-23	0	0
B cells	IGHV2-26	0	0
B cells	IGHV3-33	0	0
B cells	IGHV1-46	0	0
B cells	IGHV3-48	0	0
B cells	IGHV3-49	0	0
B cells	IGHV5-51	0	0
B cells	IGHV3-53	0	0
B cells	IGHV1-58	0	0
B cells	IGHV4-61	0	0
B cells	IGHV3-66	0	0
B cells	IGHV1-69	0	0
B cells	IGHV2-70D	0	0
B cells	IGHV3-73	0	0
B cells	IGHV5-78	0	0
B cells	C1orf220	0	0
B cells	PDCL3P5	0	0
B cells	PGAM1P7	0	0
B cells	IGLC6	0	0
B cells	IGLV9-49	0	0
B cells	IGHV3-64	0	0
B cells	LINC01857	0	0
B cells	ASH2LP1	0	0
B cells	IGHV4-59	0	0
B cells	LAMC1-AS1	0	0
B cells	IGHV3-74	0	0
B cells	IGHV3-72	0	0
B cells	LINC01013	0	0
B cells	NPM1P25	0	0
B cells	IGHV4-31	0	0
B cells	IGHV3-43	0	0
B cells	LINC02576	0	0
B cells	CCDC144NL-AS1	0	0
B cells	LINC01781	0	0
B cells	SHISA8	0	0
B cells	LINC00494	0	0
B cells	IGHD1-1	0	0
B cells	IGHJ3P	0	0
B cells	IGKV1D-8	0	0
B cells	IGKV1-6	0	0
B cells	IGKV3-20	0	0
B cells	LILRA4	0	0
B cells	IGHJ4	0	0
B cells	IGKV1-17	0	0
B cells	TNFRSF13B	0	1
B cells	IGKV1-8	0	0
B cells	IGKV1-16	0	0
B cells	IGKV2-24	0	0
B cells	IGKV3-11	0	0
B cells	IGKV1-9	0	0
B cells	IGHJ5	0	0
B cells	IGHJ3	0	0
B cells	IGKV2-30	0	0
B cells	IGKV2D-29	0	0
B cells	IGKV1-12	0	0
B cells	IGKV3-15	0	0
B cells	IGKV1-27	0	0
B cells	LINC02202	0	0
B cells	TUNAR	0	0
B cells	IGLV2-5	0	0
B cells	IGLVI-70	0	0
B cells	IGHGP	0	0
B cells	IGKV2-29	0	0
B cells	IGLC5	0	0
B cells	IGLL5	0	0
B cells	GLYATL1B	0	0
B cells	LINC02413	0	0
B cells	WFDC21P	0	0
B cells	LINC02397	0.0137	0
B cells	CNTNAP2	0.0141	0
B cells	IGKV1-5	0.0175	0
B cells	IGHA2	0.0182	0
B cells	IGLV3-1	0.0194	0
B cells	IGHV1-24	0.0198	0
B cells	IGHV4-39	0.02	0
B cells	CD19	0.023	0
B cells	SCN4A	0.0248	0
B cells	DCLK2	0.0249	0
B cells	IGHG1	0.026	0
B cells	IGHV1-2	0.0266	0
B cells	IGKV4-1	0.0273	0
B cells	ABCB4	0.0297	0
B cells	EBI3	0.0313	0
B cells	IGHG4	0.0314	0
B cells	CNFN	0.0316	0
B cells	IGLV1-51	0.0332	0
B cells	IGLV3-10	0.0343	0
B cells	IGLV2-11	0.0346	0
B cells	PAX5	0.0363	1
B cells	RAPGEF5	0.0364	0
B cells	UGT8	0.0364	0
B cells	CCSER1	0.0368	0
B cells	TCL1A	0.0387	0
B cells	OR2W3	0.0387	0
B cells	BMP3	0.0395	0
B cells	SOBP	0.0407	0
B cells	MACROD2	0.0419	0
B cells	JCHAIN	0.043	0
B cells	MOXD1	0.0432	0
B cells	MTCL1	0.0455	0
B cells	PARM1	0.046	0
B cells	FSCN2	0.0465	0
B cells	COBLL1	0.049	0
B cells	DENND5B	0.049	0
B cells	IGHG2	0.0516	0
B cells	TCL6	0.0527	0
B cells	JAM2	0.0597	0
B cells	FAM30A	0.0608	0
B cells	IGHD	0.0702	0
B cells	AKAP2	0.0715	0
B cells	SGCA	0.0716	0
B cells	CPNE5	0.0716	0
B cells	KREMEN2	0.0716	0
B cells	DNAJC5B	0.0716	0
B cells	PCDH9	0.0728	0
B cells	RNY1P16	0.0774	0
B cells	LY86-AS1	0.0774	0
B cells	INKA1	0.0791	0
B cells	CD22	0.0792	1
B cells	COCH	0.0796	0
B cells	BANK1	0.0836	0
B cells	FCRL5	0.0842	0
B cells	HS3ST1	0.086	0
B cells	IGHA1	0.0877	0
B cells	MARC2	0.0888	0
B cells	SYNPO	0.0888	0
B cells	SPTBN2	0.0895	0
B cells	PLPP3	0.0907	0
B cells	GDF7	0.0915	0
B cells	BTBD6P1	0.0915	0
B cells	AMZ1	0.093	0
B cells	PRCD	0.0965	0
B cells	FCRL1	0.0994	0
B cells	RHPN2	0.1003	0
B cells	FAM111B	0.1004	0
B cells	ADAMTS7P4	0.1052	0
B cells	JADE3	0.111	0
B cells	MGAT3	0.1118	0
B cells	ARHGAP6	0.1161	0
B cells	FCRL2	0.1165	0
B cells	LARGE1	0.1184	0
B cells	TEX9	0.1192	0
B cells	FAM167A	0.1208	0
B cells	MS4A1	0.1242	1
B cells	PPM1J	0.1296	0
B cells	DMD	0.1342	0
B cells	HLA-DPB2	0.1366	0
B cells	POU3F1	0.1456	0
B cells	IGHM	0.1538	1
B cells	OSBPL10	0.1557	0
B cells	PEG10	0.1571	0
B cells	GATM	0.1583	0
B cells	LINC00926	0.1583	0
B cells	PLA2G2D	0.1693	0
B cells	CD80	0.1719	0
B cells	KCNIP2	0.1732	0
B cells	SLC2A5	0.1738	0
B cells	IGHV4-34	0.1778	0
B cells	IGLV3-9	0.1792	0
B cells	SGO1	0.1794	0
B cells	CHAD	0.1801	0
B cells	ANGPTL1	0.1821	0
B cells	CAPN14	0.1864	0
B cells	LINC01800	0.1866	0
B cells	CD79A	0.1935	1
B cells	LINC02245	0.2007	0
B cells	HMGA1P4	0.2032	0
B cells	IGLV2-14	0.2046	0
B cells	PLEKHG1	0.2053	0
B cells	PALD1	0.2057	0
B cells	TEAD2	0.2068	0
B cells	PDE7B	0.2102	0
B cells	FAM129C	0.2174	0
B cells	MACC1	0.2226	0
B cells	PKIG	0.2236	0
B cells	FNDC11	0.2237	0
B cells	CLDN12	0.2238	0
B cells	COL4A3	0.2252	0
B cells	GNAZ	0.2269	0
B cells	CBLN3	0.2286	0
B cells	MZB1	0.2355	0
B cells	BLNK	0.2381	0
B cells	TEX21P	0.2387	0
B cells	DERL3	0.2391	0
B cells	CRIP3	0.2391	0
B cells	BACE2	0.2399	0
B cells	AHNAK2	0.2406	0
B cells	NIPSNAP3B	0.2429	0
B cells	POU2AF1	0.2656	0
B cells	FAM177B	0.2685	0
B cells	GSTA4	0.2708	0
B cells	CECR7	0.2733	0
B cells	MYO1B	0.2745	0
B cells	LAMA5	0.2774	0
B cells	FCER2	0.2781	1
B cells	NXPH4	0.2825	0
B cells	PMEPA1	0.2837	0
B cells	SNX22	0.2862	0
B cells	EFCAB5	0.2865	0
B cells	CR2	0.3014	1
B cells	ADAMTS6	0.304	0
B cells	NIPAL4	0.3067	0
B cells	MYBL2	0.3074	0
B cells	CD200	0.3084	0
B cells	C2orf88	0.3095	0
B cells	MCPH1-AS1	0.3133	0
B cells	FAM69B	0.3161	0
B cells	SAXO2	0.3164	0
B cells	ZNF594	0.3165	0
B cells	BEND4	0.3165	0
B cells	PNOC	0.3167	0
B cells	KHDRBS2	0.3203	0
B cells	SBF2-AS1	0.3266	0
B cells	L1CAM	0.3273	0
B cells	ZNF667-AS1	0.329	0
B cells	GAS6-AS1	0.33	0
B cells	AFF3	0.3311	0
B cells	RASSF6	0.3351	0
B cells	KCNMB3	0.3365	0
B cells	BCAR3	0.3406	0
B cells	ARHGAP39	0.3427	0
B cells	ZDHHC23	0.3433	0
B cells	SERPINB9P1	0.3529	0
B cells	TP73	0.3569	0
B cells	CRB2	0.3576	0
B cells	EML6	0.36	0
B cells	ZNF826P	0.3681	0
B cells	ZBTB32	0.3682	0
B cells	BLK	0.3688	0
B cells	SNORD125	0.3791	0
B cells	TNFRSF13C	0.3795	0
B cells	STAP1	0.3847	0
B cells	NRSN2-AS1	0.3869	0
B cells	DPPA4	0.395	0
B cells	SLCO4A1	0.3955	0
B cells	CERNA1	0.3993	0
B cells	CCND1	0.3994	0
B cells	BCL7A	0.3996	0
B cells	AKAP6	0.4013	0
B cells	CD79B	0.4079	1
B cells	RASGRP3	0.4138	0
B cells	TSPAN13	0.414	0
B cells	SLC9A7	0.4146	0
B cells	SETBP1	0.4161	0
B cells	P2RX5	0.4164	0
B cells	PAWR	0.4182	0
B cells	ILDR1	0.4184	0
B cells	MIR600HG	0.4184	0
B cells	LINC00662	0.4206	0
B cells	LARGE2	0.421	0
B cells	CNR2	0.4242	0
B cells	TXNDC5	0.426	0
B cells	CD70	0.4268	0
B cells	ATP8B1	0.4272	0
B cells	IL7	0.4297	0
B cells	HLA-DOB	0.4339	0
B cells	KLK1	0.4343	0
B cells	KNL1	0.4463	0
B cells	APBB2	0.4471	0
B cells	MATN1	0.4476	0
B cells	CXCR5	0.4544	0
B cells	ZNF711	0.4625	0
B cells	COL4A4	0.4643	0
B cells	DLGAP3	0.4657	0
B cells	ZNF665	0.4659	0
B cells	CLECL1	0.4716	0
B cells	BEND5	0.4728	0
B cells	SLC23A1	0.4739	0
B cells	P2RX5-TAX1BP3	0.4743	0
B cells	PSD3	0.4778	0
B cells	FNBP1L	0.4785	0
B cells	CELSR1	0.4788	0
B cells	DBNDD1	0.4809	0
B cells	PSMD10P1	0.4836	0
B cells	OLFML2A	0.488	0
B cells	CNR1	0.4911	0
B cells	FBXO10	0.4914	0
B cells	LINC02422	0.4934	0
B cells	MARCH3	0.4954	0
B cells	ADD2	0.4957	0
B cells	CCDC106	0.4964	0
B cells	WDR34	0.4994	0
B cells	EEF1A2	0.5	0
B cells	ZNF667	0.5	0
B cells	LINC00865	0.5	0
B cells	XKRX	0.5014	0
B cells	WASF1	0.5042	0
B cells	EMC3-AS1	0.5045	0
B cells	DPF3	0.5055	0
B cells	BTLA	0.5101	0
B cells	AP1S3	0.5104	0
B cells	CCDC122	0.5113	0
B cells	SYT17	0.5182	0
B cells	ZNF404	0.519	0
B cells	CAPN3	0.521	0
B cells	TCF4	0.5211	0
B cells	ADAM28	0.5227	0
B cells	MIR155HG	0.5228	0
B cells	GCNT1	0.5235	0
B cells	CCDC191	0.5274	0
B cells	PDLIM1	0.5289	0
B cells	TRAM2-AS1	0.5293	0
B cells	C12orf42	0.5314	0
B cells	FADS3	0.5314	0
B cells	EHD3	0.5319	0
B cells	C16orf74	0.5379	0
B cells	LAMC1	0.5402	0
B cells	E2F5	0.5413	0
B cells	HECTD2	0.5456	0
B cells	PTPRK	0.5462	0
B cells	C8orf37	0.5464	0
B cells	PAOX	0.5475	0
B cells	DOK7	0.5506	0
B cells	ZNF821	0.5513	0
B cells	C11orf80	0.5516	0
B cells	CLEC17A	0.5555	0
B cells	AGPAT5	0.5571	0
B cells	ZNF772	0.5571	0
B cells	PGBD4	0.5583	0
B cells	GCOM1	0.5592	0
B cells	PXDC1	0.562	0
B cells	CYP2U1	0.5623	0
B cells	MOB3B	0.5627	0
B cells	TAS1R3	0.5649	0
B cells	MMP11	0.5665	0
B cells	HLA-DOA	0.5688	0
B cells	PLPP5	0.569	0
B cells	CD180	0.5706	0
B cells	PYCR3	0.577	0
B cells	TRIM60P18	0.5803	0
B cells	DYRK4	0.5822	0
B cells	NEK8	0.5837	0
B cells	ZNF608	0.5839	0
B cells	FARP2	0.5868	0
B cells	BCL11A	0.5888	0
B cells	CD72	0.5893	0
B cells	LINC00665	0.5895	0
B cells	BARD1	0.5899	0
B cells	CACNA1F	0.5901	0
B cells	ASB14	0.5906	0
B cells	SDK2	0.5907	0
B cells	RALGPS2	0.5916	0
B cells	QRSL1	0.5918	0
B cells	KLF8	0.5959	0
B cells	EFCAB13	0.5959	0
B cells	IRS1	0.5978	0
B cells	CNN3	0.5995	0
B cells	GEN1	0.6023	0
B cells	LRP5	0.6037	0
B cells	SMAGP	0.6053	0
B cells	SLC6A16	0.6073	0
B cells	DTX1	0.6155	0
B cells	TK1	0.6155	0
B cells	STRBP	0.6156	0
B cells	SWAP70	0.6162	0
B cells	C11orf24	0.6172	0
B cells	CRACR2B	0.6198	0
B cells	PPFIBP1	0.6206	0
B cells	TNRC18P1	0.6211	0
B cells	RAB30	0.6216	0
B cells	SLC15A2	0.6239	0
B cells	DDR1	0.6247	0
B cells	TAF1A	0.6263	0
B cells	ZNF232	0.6274	0
B cells	LINC02390	0.6276	0
B cells	TOMM34	0.6278	0
B cells	SAV1	0.6306	0
B cells	SEPT7-AS1	0.6309	0
B cells	CDCA7L	0.6331	0
B cells	PAIP2B	0.6344	0
B cells	LGMN	0.6349	0
B cells	SIPA1L3	0.6377	0
B cells	TMEM156	0.6381	0
B cells	CD40	0.6435	1
B cells	ZNF347	0.6437	0
B cells	SNX25	0.6482	0
B cells	KMO	0.6497	0
B cells	IRF4	0.6501	0
B cells	GPR18	0.6504	0
B cells	PRICKLE1	0.6506	0
B cells	ZNF669	0.6517	0
B cells	MAP3K9	0.6531	0
B cells	PIK3C2B	0.6531	0
B cells	TPD52	0.654	0
B cells	NEDD4L	0.656	0
B cells	TAPT1	0.6588	0
B cells	ZNF582	0.6604	0
B cells	USP6NL	0.6613	0
B cells	MT-TY	0.6617	0
B cells	EIF2AK3	0.6627	0
B cells	ZNF439	0.6638	0
B cells	EAF2	0.6641	0
B cells	LPAR5	0.665	0
B cells	RAD51AP1	0.6667	0
B cells	GPT2	0.6706	0
B cells	MYO1E	0.6737	0
B cells	CD24P4	0.6738	0
B cells	EFHC1	0.6751	0
B cells	ZNF543	0.6772	0
B cells	GAPDHS	0.6789	0
B cells	PNPLA7	0.6823	0
B cells	ITM2C	0.6833	0
B cells	IL12A	0.684	0
B cells	KCNN4	0.6851	0
B cells	IFNLR1	0.6864	0
B cells	DEXI	0.6871	0
B cells	SNORD35B	0.689	0
B cells	KBTBD8	0.6899	0
B cells	IFT57	0.6904	0
B cells	DTX4	0.6945	0
B cells	PLEKHA4	0.695	0
B cells	WDR5B	0.6951	0
B cells	RTN4IP1	0.6963	0
B cells	GNG7	0.6966	0
B cells	EPM2A	0.6969	0
B cells	CCDC32	0.697	0
B cells	CIP2A	0.6971	0
B cells	ZNF542P	0.6978	0
B cells	SMC6	0.6985	0
B cells	QSOX2	0.7009	0
B cells	ITPR1	0.7011	0
B cells	METTL8	0.7016	0
B cells	DISP1	0.7021	0
B cells	SERHL2	0.7022	0
B cells	JAM3	0.7025	0
B cells	TIGD5	0.7052	0
B cells	ZNF736	0.7071	0
B cells	TMEM147-AS1	0.7085	0
B cells	PLD4	0.7086	0
B cells	CCDC24	0.7109	0
B cells	DRC3	0.7157	0
B cells	SEL1L3	0.7168	0
B cells	STRADB	0.7178	0
B cells	RNASEH1-AS1	0.7178	0
B cells	TSPYL5	0.7187	0
B cells	MYO1C	0.7202	0
B cells	AEBP1	0.7213	0
B cells	LRP2BP	0.7217	0
B cells	LRRC56	0.722	0
B cells	ARMCX2	0.7226	0
B cells	FAM117B	0.7227	0
B cells	ACSF2	0.7232	0
B cells	NOC3L	0.7236	0
B cells	TMED8	0.7245	0
B cells	ZBED5-AS1	0.725	0
B cells	CCDC18	0.7251	0
B cells	ARHGAP42	0.7255	0
B cells	TMEM19	0.726	0
B cells	TSPAN33	0.7263	0
B cells	LIMD1	0.7272	0
B cells	ICOSLG	0.7275	0
B cells	P2RY10	0.7279	0
B cells	ZNF726	0.7283	0
B cells	PIP5K1B	0.7294	0
B cells	CCDC50	0.7307	0
B cells	LINC00910	0.7307	0
B cells	GABPB1-AS1	0.7316	0
B cells	PRDM4	0.7342	0
B cells	AASS	0.7344	0
B cells	GGA2	0.7367	0
B cells	RALGPS1	0.737	0
B cells	BCAS4	0.7384	0
B cells	THAP9	0.7384	0
B cells	NONOP2	0.7395	0
B cells	ZNF418	0.74	0
B cells	PROCA1	0.7411	0
B cells	USP45	0.7414	0
B cells	HSF5	0.7422	0
B cells	PTPRO	0.7423	0
B cells	LINC01881	0.7426	0
B cells	TVP23A	0.7432	0
B cells	ALG14	0.7432	0
B cells	TRIM52-AS1	0.7436	0
B cells	RHBDD1	0.7442	0
B cells	SLC35F2	0.7451	0
B cells	ZBTB20	0.7457	0
B cells	ZNF318	0.7462	0
B cells	GPATCH11	0.7464	0
B cells	MT-TP	0.7481	0
B cells	SMPD2	0.7482	0
B cells	TIMELESS	0.7485	0
B cells	ZCCHC10	0.7497	0
B cells	SLC39A3	0.7506	0
B cells	CHML	0.7511	0
B cells	BICD1	0.7515	0
B cells	RIMKLB	0.7528	0
B cells	FAM3C	0.7535	0
B cells	FAM126A	0.755	0
B cells	CSNK1G3	0.7557	0
B cells	ZCCHC7	0.7562	0
B cells	SLC2A11	0.7566	0
B cells	APOM	0.7569	0
B cells	FANCD2	0.757	0
B cells	HIP1R	0.7571	0
B cells	AFG1L	0.7571	0
B cells	NUP88	0.7573	0
B cells	HDAC9	0.7576	0
B cells	CD1C	0.7587	0
B cells	TTC9	0.7597	0
B cells	ZNF441	0.7611	0
B cells	FAM111A-DT	0.7617	0
B cells	HCG11	0.7622	0
B cells	ZNF614	0.7645	0
B cells	ZNF273	0.7649	0
B cells	TRAF4	0.7654	0
B cells	TSPAN3	0.7671	0
B cells	TTC21A	0.7672	0
B cells	SIMC1	0.7675	0
B cells	SLC17A9	0.7678	0
B cells	ZNF717	0.7683	0
B cells	FAM69A	0.7691	0
B cells	SH3BP4	0.7694	0
B cells	PPM1K	0.7697	0
B cells	TMEM38B	0.7698	0
B cells	LY9	0.7698	0
B cells	PRKCE	0.7698	0
B cells	HERPUD1	0.77	0
B cells	DMXL1	0.77	0
B cells	MGAT5	0.7703	0
B cells	SNHG26	0.771	0
B cells	AGBL2	0.7725	0
B cells	RABEP2	0.773	0
B cells	MRPL39	0.7741	0
B cells	SQLE	0.7742	0
B cells	CNNM4	0.775	0
B cells	ZNF395	0.7755	0
B cells	ZNF426	0.7759	0
B cells	RP9	0.7765	0
B cells	ZHX3	0.7773	0
B cells	ATP10D	0.7775	0
B cells	TTC3P1	0.7778	0
B cells	ZNF596	0.7791	0
B cells	HPS5	0.7795	0
B cells	NDUFAF6	0.7796	0
B cells	LRCH1	0.7799	0
B cells	ANKAR	0.7803	0
B cells	ZNF383	0.7803	0
B cells	ZNF782	0.7829	0
B cells	WDR19	0.784	0
B cells	ZNF92	0.7847	0
B cells	ZBTB10	0.7848	0
B cells	L3HYPDH	0.785	0
B cells	SLC37A1	0.7853	0
B cells	SLC25A19	0.786	0
B cells	ZFP3	0.786	0
B cells	ZNF90	0.7879	0
B cells	BACH2	0.7884	0
B cells	MATN1-AS1	0.7894	0
B cells	POMT2	0.7911	0
B cells	DLEU1	0.7914	0
B cells	MYL6B	0.7918	0
B cells	RRAGB	0.7919	0
B cells	CIITA	0.7921	0
B cells	RHOBTB2	0.7928	0
B cells	CNKSR2	0.7928	0
B cells	AMN	0.7932	0
B cells	KIF20B	0.7934	0
B cells	ZDHHC21	0.7936	0
B cells	JRKL	0.7937	0
B cells	TCF3	0.7947	0
B cells	ZNF852	0.7961	0
B cells	SPRYD7	0.7963	0
B cells	ZNF765	0.7965	0
B cells	GRASP	0.7984	0
B cells	ZNF85	0.7999	0
B cells	PHF7	0.8002	0
B cells	AMER1	0.8009	0
B cells	LINC01237	0.8016	0
B cells	CYB561A3	0.8017	0
B cells	MEF2C-AS1	0.8018	0
B cells	MEF2C	0.802	0
B cells	ARHGAP24	0.803	0
B cells	CAMK2D	0.8039	0
B cells	WDR4	0.804	0
B cells	LINC01238	0.8043	0
B cells	PWP1	0.8044	0
B cells	PARP1	0.8044	0
B cells	PHLPP2	0.8048	0
B cells	LIPE	0.8054	0
B cells	ADARB1	0.8056	0
B cells	RNASEH2B	0.8064	0
B cells	VAV2	0.8065	0
B cells	SCRN1	0.8067	0
B cells	RRAS2	0.8074	0
B cells	XKR6	0.8074	0
B cells	BPNT1	0.8085	0
B cells	DCAF4	0.8087	0
B cells	ZNF678	0.8088	0
B cells	RCCD1	0.8089	0
B cells	RPAIN	0.8096	0
B cells	ITGB3BP	0.81	0
B cells	AIFM2	0.8101	0
B cells	CENPH	0.812	0
B cells	IQCB1	0.812	0
B cells	TRAF5	0.8121	0
B cells	SMIM14	0.8129	0
B cells	TCTN1	0.8132	0
B cells	ZNF260	0.8138	0
B cells	ACBD3	0.8139	0
B cells	ZBED5	0.8139	0
B cells	SPPL2B	0.8141	0
B cells	FCHSD2	0.8143	0
B cells	VEGFB	0.8143	0
B cells	SHMT2	0.8144	0
B cells	SEMA7A	0.8162	0
B cells	DUS2	0.8163	0
B cells	GUCD1	0.8164	0
B cells	AIDA	0.8172	0
B cells	FANCE	0.8183	0
B cells	ST6GAL1	0.8185	0
B cells	TMEM62	0.8186	0
B cells	TRIO	0.8187	0
B cells	HEATR6	0.8188	0
B cells	TAF4B	0.8193	0
B cells	BLCAP	0.8196	0
B cells	PNPLA4	0.8209	0
B cells	ZFP82	0.8211	0
B cells	L3MBTL3	0.8213	0
B cells	ZSCAN30	0.8228	0
B cells	ANGPTL6	0.8229	0
B cells	GTF2IRD2B	0.8237	0
B cells	ZNF343	0.8245	0
B cells	COX20	0.8256	0
B cells	ZNF253	0.8271	0
B cells	EFL1	0.8276	0
B cells	SRFBP1	0.8291	0
B cells	ST6GALNAC4	0.8295	0
B cells	PIP4P1	0.8295	0
B cells	SLC30A4	0.8297	0
B cells	ANKRD33B	0.83	0
B cells	SEMA6A-AS1	0.83	0
B cells	CCDC96	0.831	0
B cells	ZNF532	0.8327	0
B cells	ACADM	0.8333	0
B cells	MIPEP	0.8345	0
B cells	NCOA3	0.8345	0
B cells	ARHGAP32	0.8354	0
B cells	FOXP4	0.8356	0
B cells	SECISBP2L	0.8357	0
B cells	TRPT1	0.8359	0
B cells	HHEX	0.8367	0
B cells	UST	0.837	0
B cells	ABHD17B	0.8372	0
B cells	NEIL1	0.8374	0
B cells	FBXW11	0.8377	0
B cells	ZMAT1	0.8381	0
B cells	DCK	0.8382	0
B cells	CXXC5	0.8382	0
B cells	ZSCAN12	0.8383	0
B cells	GNB5	0.8385	0
B cells	ZXDA	0.8386	0
B cells	DOP1B	0.8393	0
B cells	RMC1	0.8395	0
B cells	CCDC77	0.8399	0
B cells	MTSS1	0.8399	0
B cells	POLD4	0.8399	0
B cells	ZNF675	0.84	0
B cells	RAD51C	0.8404	0
B cells	TMEM134	0.8407	0
B cells	ZBTB5	0.841	0
B cells	LIMS2	0.8411	0
B cells	RABEP1	0.8413	0
B cells	SH3BP5	0.8413	0
B cells	TCEANC	0.8414	0
B cells	REPIN1	0.8415	0
B cells	USPL1	0.8416	0
B cells	SKP2	0.8416	0
B cells	PRKD3	0.8425	0
B cells	EIF1B	0.8428	0
B cells	ZNF813	0.8428	0
B cells	HLA-DQB1-AS1	0.8429	0
B cells	MCM2	0.8431	0
B cells	DICER1-AS1	0.8441	0
B cells	FBXW8	0.8444	0
B cells	MYC	0.8448	0
B cells	ZSWIM1	0.8452	0
B cells	ZNF480	0.8454	0
B cells	ENDOD1	0.8458	0
B cells	SYPL1	0.8459	0
B cells	SNX29	0.8461	0
B cells	BIRC3	0.8463	0
B cells	TRAF3	0.8467	0
B cells	LINC01547	0.8479	0
B cells	ATG4C	0.848	0
B cells	SNHG7	0.848	0
B cells	GEMIN7	0.8481	0
B cells	LRRN2	0.8486	0
B cells	GLO1	0.8488	0
B cells	MYO7B	0.8493	0
B cells	CHD1L	0.8498	0
B cells	CD52	0.8498	0
B cells	STAG3	0.8503	0
B cells	APPL1	0.851	0
B cells	GANC	0.8511	0
B cells	HMBOX1	0.8514	0
B cells	HSPA4	0.852	0
B cells	REL	0.8522	0
B cells	PHTF2	0.8529	0
B cells	CEP131	0.853	0
B cells	ZNF134	0.8534	0
B cells	ZNF747	0.8536	0
B cells	CCS	0.8555	0
B cells	MTHFD1	0.8557	0
B cells	DNMBP	0.8557	0
B cells	TRIM13	0.8557	0
B cells	MPP6	0.8558	0
B cells	ZNF43	0.8563	0
B cells	ADK	0.8566	0
B cells	CCNB1IP1	0.8573	0
B cells	SLC2A1	0.8576	0
B cells	DARS2	0.858	0
B cells	MCM5	0.8582	0
B cells	PTK2	0.8584	0
B cells	SLC25A42	0.8586	0
B cells	WDR11	0.8587	0
B cells	GKAP1	0.8589	0
B cells	INPP5F	0.8594	0
B cells	BTN2A2	0.8603	0
B cells	XYLT1	0.8606	0
B cells	KIF3B	0.8607	0
B cells	USP12	0.8608	0
B cells	PWWP2B	0.8611	0
B cells	IRF8	0.8616	0
B cells	NIPA1	0.8618	0
B cells	HVCN1	0.8629	0
B cells	TMA16	0.8638	0
B cells	ATP5S	0.8639	0
B cells	ACP5	0.8647	0
B cells	ZBTB24	0.865	0
B cells	PRDM2	0.865	0
B cells	TRIP10	0.865	0
B cells	UVRAG	0.8653	0
B cells	LHPP	0.8654	0
B cells	TUBGCP4	0.8657	0
B cells	CEP83	0.8657	0
B cells	ZNF461	0.8665	0
B cells	SINHCAF	0.8667	0
B cells	BCOR	0.867	0
B cells	NGLY1	0.8684	0
B cells	CLIC4	0.8684	0
B cells	NOP16	0.8695	0
B cells	CXorf57	0.8695	0
B cells	HRAS	0.8696	0
B cells	NT5C	0.8697	0
B cells	DEPDC5	0.8698	0
B cells	HLA-DQA1	0.8701	0
B cells	PFKM	0.8709	0
B cells	ARHGAP17	0.8711	0
B cells	MED22	0.8713	0
B cells	CLEC16A	0.8716	0
B cells	SP140L	0.8721	0
B cells	CD37	0.8723	0
B cells	ZMIZ2	0.8724	0
B cells	EZR	0.8731	0
B cells	CERS4	0.8734	0
B cells	LSM7	0.8737	0
B cells	APOBEC3F	0.8745	0
B cells	PM20D2	0.8745	0
B cells	GOLGA2P5	0.8752	0
B cells	TMEM80	0.8756	0
B cells	CCDC6	0.8758	0
B cells	INTS9	0.8759	0
B cells	WDFY4	0.8763	0
B cells	ZHX2	0.8763	0
B cells	PHF6	0.8767	0
B cells	ZNF721	0.8768	0
B cells	ATL2	0.8771	0
B cells	ADAM19	0.8777	0
B cells	DCLRE1C	0.8786	0
B cells	TGIF2	0.879	0
B cells	SMAD3	0.879	0
B cells	TCEA2	0.8791	0
B cells	MAP3K14	0.8798	0
B cells	HEATR5B	0.8803	0
B cells	RAD51B	0.8805	0
B cells	MTERF3	0.8809	0
B cells	BET1	0.8816	0
B cells	TELO2	0.8818	0
B cells	EDEM1	0.8826	0
B cells	ZNF761	0.8827	0
B cells	SOGA1	0.883	0
B cells	RPL32P1	0.8835	0
B cells	SLC50A1	0.8837	0
B cells	SGSM3	0.8838	0
B cells	GNA12	0.8838	0
B cells	CEP152	0.884	0
B cells	PABPC1L	0.8841	0
B cells	TP53	0.8845	0
B cells	SREBF2	0.8845	0
B cells	DDI2	0.885	0
B cells	MRPL40	0.8852	0
B cells	PLEKHA2	0.8859	0
B cells	INO80	0.8872	0
B cells	TMEM175	0.8873	0
B cells	SNX2	0.8873	0
B cells	NLK	0.8875	0
B cells	TMEM131	0.8876	0
B cells	SOX12	0.8877	0
B cells	PTPN1	0.8878	0
B cells	FOXO1	0.8879	0
B cells	TRAK1	0.8879	0
B cells	MED30	0.8881	0
B cells	CYP2R1	0.8882	0
B cells	RRNAD1	0.8884	0
B cells	HPS3	0.8886	0
B cells	TSTD1	0.889	0
B cells	SLC12A2	0.8891	0
B cells	FBXO4	0.8898	0
B cells	KLHDC10	0.8899	0
B cells	RAD17	0.8902	0
B cells	C12orf45	0.8916	0
B cells	CD2AP	0.8916	0
B cells	C11orf95	0.8921	0
B cells	RBM6	0.8926	0
B cells	TMEM18	0.8928	0
B cells	HELQ	0.893	0
B cells	ZNF22	0.8932	0
B cells	TCEA1	0.8936	0
B cells	SMARCB1	0.8938	0
B cells	TMEM243	0.894	0
B cells	RIC3	0.8941	0
B cells	KNTC1	0.8941	0
B cells	FUT8	0.8942	0
B cells	TEX10	0.8948	0
B cells	THUMPD3-AS1	0.8951	0
B cells	KDM2B	0.8954	0
B cells	UCKL1	0.8955	0
B cells	HACD2	0.8962	0
B cells	SNX8	0.8971	0
B cells	CLN8	0.8971	0
B cells	TERF2	0.8975	0
B cells	UBE2O	0.8977	0
B cells	PAN2	0.8982	0
B cells	TLE1	0.8989	0
B cells	ZNF45	0.899	0
B cells	TAF1D	0.899	0
B cells	N4BP2L1	0.8992	0
B cells	ZNF768	0.8992	0
B cells	DDHD2	0.8995	0
B cells	CENPJ	0.8995	0
B cells	KIAA0355	0.8996	0
B cells	MARCH9	0.9002	0
B cells	CACFD1	0.9003	0
B cells	SLC35B3	0.9005	0
B cells	SLC38A9	0.9007	0
B cells	ZNF740	0.901	0
B cells	DGKD	0.9014	0
B cells	PPP1R16B	0.9015	0
B cells	AKAP11	0.9016	0
B cells	RFX5	0.9017	0
B cells	GABBR1	0.9017	0
B cells	ZNF580	0.9019	0
B cells	ZNF775	0.902	0
B cells	ARID1B	0.9024	0
B cells	EP400P1	0.9025	0
B cells	THUMPD2	0.9027	0
B cells	FAM149B1	0.9027	0
B cells	RB1	0.9028	0
B cells	CENPV	0.9033	0
B cells	FRS2	0.9038	0
B cells	AEN	0.9042	0
B cells	BBX	0.9044	0
B cells	PMS1	0.9051	0
B cells	SP140	0.9053	0
B cells	CHAMP1	0.9057	0
B cells	MMP17	0.9058	0
B cells	MARCH1	0.9063	0
B cells	NUP160	0.9065	0
B cells	RBM38	0.9074	0
B cells	ZDHHC2	0.9076	0
B cells	SCO1	0.9077	0
B cells	EPB41L2	0.9078	0
B cells	MBTD1	0.9079	0
B cells	MTPAP	0.9083	0
B cells	ANKRD49	0.9089	0
B cells	MBNL3	0.9091	0
B cells	BLM	0.9092	0
B cells	ZNF7	0.9095	0
B cells	KDM4C	0.9096	0
B cells	NFX1	0.91	0
B cells	CNPPD1	0.91	0
B cells	FCMR	0.9104	0
B cells	MIOS	0.9107	0
B cells	WDR27	0.9109	0
B cells	INTS4	0.9113	0
B cells	ALDH16A1	0.9128	0
B cells	TCERG1	0.9133	0
B cells	C12orf49	0.9135	0
B cells	IL24	0.9137	0
B cells	IZUMO4	0.9138	0
B cells	RABGAP1	0.914	0
B cells	SMARCE1	0.9151	0
B cells	DNAJC10	0.9153	0
B cells	ZNF280D	0.9156	0
B cells	PRMT1	0.9158	0
B cells	HPS4	0.9161	0
B cells	NME4	0.9178	0
B cells	CLK4	0.9179	0
B cells	ZNF644	0.918	0
B cells	UHRF2	0.9181	0
B cells	HLA-DMB	0.9189	0
B cells	SETDB2	0.9191	0
B cells	C2CD5	0.9192	0
B cells	RPA3	0.9193	0
B cells	AMFR	0.9205	0
B cells	METTL7A	0.9205	0
B cells	ZXDB	0.9208	0
B cells	ATP2A3	0.9209	0
B cells	CHPT1	0.9221	0
B cells	MTF2	0.9221	0
B cells	SCMH1	0.9223	0
B cells	CLCN6	0.9228	0
B cells	INTS1	0.923	0
B cells	SYVN1	0.9234	0
B cells	L3MBTL1	0.9247	0
B cells	KAT2A	0.925	0
B cells	PRMT3	0.9254	0
B cells	RNF26	0.9258	0
B cells	INTS6L	0.926	0
B cells	ADCK5	0.9264	0
B cells	IKZF3	0.9265	0
B cells	OFD1	0.9271	0
B cells	MRRF	0.9274	0
B cells	GMFB	0.9276	0
B cells	PUS1	0.9277	0
B cells	GEMIN4	0.9279	0
B cells	TBC1D9	0.9281	0
B cells	HADH	0.9291	0
B cells	KHNYN	0.9294	0
B cells	BTAF1	0.9296	0
B cells	HECTD4	0.9298	0
B cells	TMEM131L	0.9299	0
B cells	RNASEH2C	0.9299	0
B cells	MEGF8	0.9307	0
B cells	ARRDC2	0.9312	0
B cells	DRAM2	0.9312	0
B cells	CUL7	0.9316	0
B cells	NVL	0.9319	0
B cells	RPS11	0.9324	0
B cells	MAP4K1	0.9326	0
B cells	FAAP100	0.9336	0
B cells	MRPS25	0.9339	0
B cells	RABGGTB	0.934	0
B cells	ARFGEF2	0.9342	0
B cells	DDX47	0.9342	0
B cells	SCAF4	0.9343	0
B cells	PSME4	0.9345	0
B cells	RHOH	0.9347	0
B cells	CNTRL	0.9352	0
B cells	CSNK2A1	0.9355	0
B cells	ARHGEF7	0.9358	0
B cells	ANKRD10	0.9359	0
B cells	SMG9	0.9361	0
B cells	ZNF791	0.9364	0
B cells	ARHGEF18	0.9372	0
B cells	CEP120	0.9372	0
B cells	SSBP2	0.9374	0
B cells	MCCC1	0.9378	0
B cells	USE1	0.9383	0
B cells	GATD3A	0.9386	0
B cells	VARS	0.9386	0
B cells	TUT4	0.9391	0
B cells	ACSS1	0.9391	0
B cells	PARP15	0.9392	0
B cells	MTX2	0.9394	0
B cells	NHLRC2	0.9394	0
B cells	RECQL5	0.9401	0
B cells	UBE2I	0.9405	0
B cells	FBRSL1	0.9406	0
B cells	USP7	0.9408	0
B cells	PPP3CC	0.9409	0
B cells	LCORL	0.9409	0
B cells	RBM41	0.9422	0
B cells	MCM7	0.9423	0
B cells	NOD1	0.9426	0
B cells	ZNF706	0.9426	0
B cells	CEP95	0.9431	0
B cells	PLEKHJ1	0.9449	0
B cells	MAP4K2	0.9456	0
B cells	GTF3C2	0.9459	0
B cells	INVS	0.9462	0
B cells	CDK5RAP2	0.9465	0
B cells	IKBKB	0.9466	0
B cells	PIH1D1	0.9468	0
B cells	EIF1AD	0.9474	0
B cells	PARN	0.9475	0
B cells	POLD2	0.9476	0
B cells	EPM2AIP1	0.9478	0
B cells	GABPB1	0.9481	0
B cells	PNN	0.9483	0
B cells	SNX5	0.9485	0
B cells	HMGN1	0.9493	0
B cells	GPR137	0.9495	0
B cells	TCF12	0.9516	0
B cells	NSRP1	0.9517	0
B cells	RPL8	0.9524	0
B cells	SMARCC1	0.9538	0
B cells	CD74	0.9539	0
B cells	UBA6	0.9539	0
B cells	PTMA	0.9541	0
B cells	LEMD3	0.955	0
B cells	HLA-DMA	0.9554	0
B cells	VHL	0.9562	0
B cells	HLA-DPB1	0.9565	0
B cells	RRP15	0.9569	0
B cells	CD83	0.9575	0
B cells	ZFYVE19	0.9575	0
B cells	ARGLU1	0.9586	0
B cells	ZFR	0.9588	0
B cells	SLC25A1	0.9597	0
B cells	ELMOD3	0.9604	0
B cells	SNRPA1	0.9605	0
B cells	NUPL2	0.962	0
B cells	SIDT1	0.9621	0
B cells	ALG8	0.9634	0
B cells	UBXN1	0.9637	0
B cells	SMARCD1	0.964	0
B cells	TP53BP1	0.9641	0
B cells	UTP6	0.9643	0
B cells	RANBP10	0.9645	0
B cells	SS18	0.9646	0
B cells	STK25	0.9649	0
B cells	TRAK2	0.9651	0
B cells	MIS18BP1	0.9688	0
B cells	ZNF76	0.9689	0
B cells	FKRP	0.969	0
B cells	MALT1	0.9715	0
B cells	SEMA4B	0.9716	0
B cells	HLA-DQB1	0.9729	0
B cells	CIRBP	0.9739	0
B cells	RCBTB1	0.9757	0
B cells	POU2F2	0.9776	0
B cells	OARD1	0.9787	0
B cells	TLK1	0.9812	0
CD4+ T cells	ST6GALNAC1	0	0
CD4+ T cells	CASP1P2	0	0
CD4+ T cells	SLC22A31	0.0568	0
CD4+ T cells	FBLN7	0.0636	0
CD4+ T cells	GPRC5B	0.0721	0
CD4+ T cells	SEMA3G	0.081	0
CD4+ T cells	BCAS2P2	0.1052	0
CD4+ T cells	ISM1	0.1114	0
CD4+ T cells	KRT1	0.1152	0
CD4+ T cells	LZTS1	0.1284	0
CD4+ T cells	AKR1C1	0.1318	0
CD4+ T cells	LINC00892	0.1457	0
CD4+ T cells	HLF	0.147	0
CD4+ T cells	TRBV7-1	0.1505	0
CD4+ T cells	MCF2L-AS1	0.1577	0
CD4+ T cells	SORCS3	0.1821	0
CD4+ T cells	GREM2	0.2023	0
CD4+ T cells	GCAT	0.2089	0
CD4+ T cells	AKR1E2	0.234	0
CD4+ T cells	PTPN13	0.2411	0
CD4+ T cells	TRAV38-1	0.25	0
CD4+ T cells	CCR10	0.2524	1
CD4+ T cells	NKD1	0.2549	0
CD4+ T cells	PI16	0.2587	0
CD4+ T cells	SARDH	0.2812	0
CD4+ T cells	TSHZ2	0.2997	0
CD4+ T cells	RAC3	0.3	0
CD4+ T cells	THBS4	0.3074	0
CD4+ T cells	ZNF563	0.316	0
CD4+ T cells	C14orf132	0.3361	0
CD4+ T cells	PDE9A	0.3383	0
CD4+ T cells	NECTIN3	0.3404	0
CD4+ T cells	ANKRD18A	0.3661	0
CD4+ T cells	DEPDC7	0.3708	0
CD4+ T cells	FAM201A	0.3716	0
CD4+ T cells	FOXP3	0.387	0
CD4+ T cells	ANKRD55	0.3943	0
CD4+ T cells	C21orf62-AS1	0.3953	0
CD4+ T cells	KLHL32	0.4022	0
CD4+ T cells	CD40LG	0.4149	1
CD4+ T cells	EPHA1-AS1	0.417	0
CD4+ T cells	ZDHHC11B	0.4217	0
CD4+ T cells	GPR15	0.4237	0
CD4+ T cells	ANK3	0.4257	0
CD4+ T cells	TMIE	0.4388	0
CD4+ T cells	SLC22A23	0.4462	0
CD4+ T cells	ADTRP	0.4587	0
CD4+ T cells	RNF207	0.4619	0
CD4+ T cells	MEOX1	0.4621	0
CD4+ T cells	DBH	0.4645	0
CD4+ T cells	FAAH2	0.4672	0
CD4+ T cells	TRAV26-1	0.4713	0
CD4+ T cells	LINC02325	0.4835	0
CD4+ T cells	PRKG2	0.4898	0
CD4+ T cells	TRAV9-2	0.5	0
CD4+ T cells	WNT7A	0.5049	0
CD4+ T cells	LINC01891	0.5059	0
CD4+ T cells	AXIN2	0.5063	0
CD4+ T cells	CMTM8	0.5076	0
CD4+ T cells	SRP54-AS1	0.5113	0
CD4+ T cells	LINC01431	0.5119	0
CD4+ T cells	BUB1	0.5129	0
CD4+ T cells	CCR4	0.5155	1
CD4+ T cells	SUSD4	0.5167	0
CD4+ T cells	CHRM3	0.519	0
CD4+ T cells	TRAV6	0.519	0
CD4+ T cells	ALS2CL	0.5206	0
CD4+ T cells	SALL2	0.5245	0
CD4+ T cells	PIANP	0.5336	0
CD4+ T cells	HYKK	0.5372	0
CD4+ T cells	CTLA4	0.5412	0
CD4+ T cells	EXOC3-AS1	0.5447	0
CD4+ T cells	PPIEL	0.547	0
CD4+ T cells	GPA33	0.5484	0
CD4+ T cells	DNM3	0.5493	0
CD4+ T cells	GINS2	0.5565	0
CD4+ T cells	IRGM	0.5565	0
CD4+ T cells	FHIT	0.5636	0
CD4+ T cells	LINC01259	0.5641	0
CD4+ T cells	DBH-AS1	0.5657	0
CD4+ T cells	OLFM2	0.5708	0
CD4+ T cells	TRAV41	0.5748	0
CD4+ T cells	CNTNAP1	0.5774	0
CD4+ T cells	TRBV24-1	0.5799	0
CD4+ T cells	TSPAN6	0.5803	0
CD4+ T cells	GIMAP3P	0.5803	0
CD4+ T cells	FAM50B	0.5819	0
CD4+ T cells	HKDC1	0.5827	0
CD4+ T cells	MDS2	0.5936	0
CD4+ T cells	NRN1L	0.5975	0
CD4+ T cells	MB21D2	0.5978	0
CD4+ T cells	TRAV16	0.5986	0
CD4+ T cells	TRAV25	0.6037	0
CD4+ T cells	RPL26P6	0.6103	0
CD4+ T cells	RTKN2	0.6153	0
CD4+ T cells	BAG3	0.6222	0
CD4+ T cells	RNF212	0.6238	0
CD4+ T cells	GPR150	0.6276	0
CD4+ T cells	ALDH8A1	0.6309	0
CD4+ T cells	RGS5	0.6309	0
CD4+ T cells	FAM184A	0.6324	0
CD4+ T cells	FHL1	0.6348	0
CD4+ T cells	HSD11B1L	0.6357	0
CD4+ T cells	TMEM177	0.6431	0
CD4+ T cells	CBR3	0.6513	0
CD4+ T cells	TRAV24	0.6523	0
CD4+ T cells	SPIN3	0.6535	0
CD4+ T cells	SPSB1	0.6553	0
CD4+ T cells	MINCR	0.6554	0
CD4+ T cells	CRB3	0.6596	0
CD4+ T cells	TRAV8-4	0.6655	0
CD4+ T cells	ANKRD36BP2	0.6656	0
CD4+ T cells	LRP6	0.6685	0
CD4+ T cells	PLCL1	0.6686	0
CD4+ T cells	TRAV27	0.6702	0
CD4+ T cells	NOS3	0.6703	0
CD4+ T cells	FBXL8	0.6722	0
CD4+ T cells	MORC4	0.6734	0
CD4+ T cells	CHN1	0.6764	0
CD4+ T cells	YJEFN3	0.6774	0
CD4+ T cells	TSPAN18	0.6776	0
CD4+ T cells	FAAHP1	0.6788	0
CD4+ T cells	DNAH6	0.6816	0
CD4+ T cells	NET1	0.684	0
CD4+ T cells	SOX8	0.6873	0
CD4+ T cells	TRAV20	0.6884	0
CD4+ T cells	GPHN	0.689	0
CD4+ T cells	MBOAT4	0.6899	0
CD4+ T cells	TRAV8-3	0.6903	0
CD4+ T cells	TRAV13-1	0.6903	0
CD4+ T cells	C3orf52	0.6924	0
CD4+ T cells	LINC00920	0.6927	0
CD4+ T cells	CELA1	0.6934	0
CD4+ T cells	TMEM200A	0.6934	0
CD4+ T cells	ZNF781	0.6934	0
CD4+ T cells	TRAV22	0.6934	0
CD4+ T cells	TRAV36DV7	0.6934	0
CD4+ T cells	TRAV39	0.6934	0
CD4+ T cells	LINC00243	0.6987	0
CD4+ T cells	EDAR	0.6994	0
CD4+ T cells	ACP6	0.6996	0
CD4+ T cells	MRPL50	0.7043	0
CD4+ T cells	AP3M2	0.705	0
CD4+ T cells	CCDC34	0.7059	0
CD4+ T cells	TRBV5-4	0.7063	0
CD4+ T cells	AK5	0.7067	0
CD4+ T cells	TRAV2	0.7113	0
CD4+ T cells	NAALAD2	0.7117	0
CD4+ T cells	PET117	0.7117	0
CD4+ T cells	CCR12P	0.7132	0
CD4+ T cells	TRBV3-1	0.7137	0
CD4+ T cells	TRBV2	0.714	0
CD4+ T cells	CNKSR1	0.7141	0
CD4+ T cells	KANK1	0.715	0
CD4+ T cells	AFAP1	0.7242	0
CD4+ T cells	TCEA3	0.7254	0
CD4+ T cells	HSPG2	0.7283	0
CD4+ T cells	ST8SIA1	0.7294	0
CD4+ T cells	ANKK1	0.7296	0
CD4+ T cells	LINC02273	0.7308	0
CD4+ T cells	IL2RA	0.7358	0
CD4+ T cells	SGPP2	0.7364	0
CD4+ T cells	CASP6	0.7368	0
CD4+ T cells	TRAT1	0.7376	0
CD4+ T cells	GPC2	0.7379	0
CD4+ T cells	HHLA3	0.739	0
CD4+ T cells	MAGI3	0.7422	0
CD4+ T cells	PMEL	0.7422	0
CD4+ T cells	TTC4	0.7436	0
CD4+ T cells	KRTCAP3	0.7437	0
CD4+ T cells	HPF1	0.745	0
CD4+ T cells	TRBV5-5	0.7466	0
CD4+ T cells	CARD14	0.7501	0
CD4+ T cells	TRBV21-1	0.7526	0
CD4+ T cells	CCR9	0.7536	0
CD4+ T cells	CDON	0.754	0
CD4+ T cells	SLC5A2	0.754	0
CD4+ T cells	TRIM74	0.754	0
CD4+ T cells	KRT2	0.754	0
CD4+ T cells	GNRHR2	0.754	0
CD4+ T cells	PLD6	0.7554	0
CD4+ T cells	SPAG16	0.7557	0
CD4+ T cells	TRBV6-6	0.7596	0
CD4+ T cells	EMBP1	0.7597	0
CD4+ T cells	GCNT4	0.7601	0
CD4+ T cells	VSIG1	0.7602	0
CD4+ T cells	FBXL16	0.7621	0
CD4+ T cells	AGMAT	0.7631	0
CD4+ T cells	ACVR1C	0.7657	0
CD4+ T cells	FAM241B	0.7677	0
CD4+ T cells	TRBV5-1	0.7715	0
CD4+ T cells	GRPEL2	0.7719	0
CD4+ T cells	TRBV7-3	0.773	0
CD4+ T cells	EPHX1	0.7765	0
CD4+ T cells	NOG	0.7766	0
CD4+ T cells	NTN5	0.7782	0
CD4+ T cells	CCNI2	0.7782	0
CD4+ T cells	TRAV38-2DV8	0.7789	0
CD4+ T cells	MORN3	0.7803	0
CD4+ T cells	LINC00402	0.7814	0
CD4+ T cells	PECR	0.7818	0
CD4+ T cells	ICOS	0.7831	1
CD4+ T cells	PRIM1	0.7838	0
CD4+ T cells	OSBP2	0.7851	0
CD4+ T cells	SUSD3	0.7855	0
CD4+ T cells	SLC35G1	0.7883	0
CD4+ T cells	KNOP1	0.7886	0
CD4+ T cells	GIMAP8	0.7888	0
CD4+ T cells	SLC4A5	0.7906	0
CD4+ T cells	TRBV30	0.7906	0
CD4+ T cells	KDF1	0.7925	0
CD4+ T cells	TRPC1	0.7949	0
CD4+ T cells	EBPL	0.7965	0
CD4+ T cells	ACTR6	0.7967	0
CD4+ T cells	MAL	0.7981	0
CD4+ T cells	WDR86-AS1	0.7987	0
CD4+ T cells	EPHX2	0.7997	0
CD4+ T cells	PAX6	0.8018	0
CD4+ T cells	ADAMTS17	0.8018	0
CD4+ T cells	TMEM204	0.8036	0
CD4+ T cells	BEX3	0.8044	0
CD4+ T cells	TNNC1	0.8066	0
CD4+ T cells	RFESD	0.8066	0
CD4+ T cells	PITPNA-AS1	0.8086	0
CD4+ T cells	ATP6V0E2-AS1	0.8095	0
CD4+ T cells	CACNA1I	0.8103	0
CD4+ T cells	LAT	0.8108	0
CD4+ T cells	LINC00426	0.8112	0
CD4+ T cells	TFB1M	0.8116	0
CD4+ T cells	ZWINT	0.8132	0
CD4+ T cells	SORBS3	0.8137	0
CD4+ T cells	TRIM16	0.8152	0
CD4+ T cells	SEMA4G	0.8155	0
CD4+ T cells	PRKCA	0.8161	0
CD4+ T cells	LINC01806	0.8161	0
CD4+ T cells	COL27A1	0.8178	0
CD4+ T cells	THEM4	0.8192	0
CD4+ T cells	ZNF815P	0.8194	0
CD4+ T cells	ZDHHC11	0.8195	0
CD4+ T cells	MALINC1	0.8195	0
CD4+ T cells	LIPT2	0.8224	0
CD4+ T cells	INPP4B	0.8229	0
CD4+ T cells	RAB15	0.8233	0
CD4+ T cells	RECK	0.8259	0
CD4+ T cells	MAF	0.826	0
CD4+ T cells	SHF	0.8271	0
CD4+ T cells	ELAC1	0.8271	0
CD4+ T cells	TRBV20-1	0.8286	0
CD4+ T cells	DIP2C	0.829	0
CD4+ T cells	MRPL58	0.8305	0
CD4+ T cells	TPM2	0.8306	0
CD4+ T cells	ACAT2	0.8307	0
CD4+ T cells	GIMAP7	0.8308	0
CD4+ T cells	SCOC	0.8316	0
CD4+ T cells	GIMAP1	0.8318	0
CD4+ T cells	NIFK-AS1	0.8322	0
CD4+ T cells	IL6ST	0.8337	0
CD4+ T cells	LINC02361	0.8338	0
CD4+ T cells	RWDD2A	0.8345	0
CD4+ T cells	HDDC3	0.8346	0
CD4+ T cells	HOOK1	0.8349	0
CD4+ T cells	STX2	0.8356	0
CD4+ T cells	SYCE2	0.836	0
CD4+ T cells	TBC1D4	0.8361	0
CD4+ T cells	CAND2	0.8368	0
CD4+ T cells	ADPRM	0.8368	0
CD4+ T cells	GNPNAT1	0.8369	0
CD4+ T cells	SLC22A17	0.8374	0
CD4+ T cells	LINC00205	0.8403	0
CD4+ T cells	NFRKB	0.8405	0
CD4+ T cells	OXLD1	0.8408	0
CD4+ T cells	PPP1R3F	0.8412	0
CD4+ T cells	RIOX2	0.8424	0
CD4+ T cells	CDPF1	0.8429	0
CD4+ T cells	TLE2	0.8459	0
CD4+ T cells	SESN3	0.8468	0
CD4+ T cells	TAF9B	0.847	0
CD4+ T cells	BOLA3	0.8478	0
CD4+ T cells	ABCB9	0.8484	0
CD4+ T cells	TMEM106B	0.8486	0
CD4+ T cells	EEF1A1P6	0.8506	0
CD4+ T cells	PRPF40B	0.8509	0
CD4+ T cells	REXO2	0.851	0
CD4+ T cells	TRAV8-2	0.8513	0
CD4+ T cells	CLIP3	0.8514	0
CD4+ T cells	EEF1AKMT1	0.8514	0
CD4+ T cells	LAGE3	0.8517	0
CD4+ T cells	PLGRKT	0.8523	0
CD4+ T cells	DNAJC19	0.8532	0
CD4+ T cells	CCDC167	0.8533	0
CD4+ T cells	KCNH2	0.8541	0
CD4+ T cells	PKIA	0.8552	0
CD4+ T cells	STX17	0.8553	0
CD4+ T cells	GIMAP5	0.8565	0
CD4+ T cells	SAE1	0.8572	0
CD4+ T cells	CD28	0.8573	0
CD4+ T cells	CLUAP1	0.8586	0
CD4+ T cells	MAST4	0.8593	0
CD4+ T cells	PFN2	0.8593	0
CD4+ T cells	NMRK1	0.8601	0
CD4+ T cells	MFHAS1	0.8602	0
CD4+ T cells	PLSCR3	0.8602	0
CD4+ T cells	NDUFA6-DT	0.8612	0
CD4+ T cells	LINC01422	0.8615	0
CD4+ T cells	MAPKAPK5-AS1	0.8615	0
CD4+ T cells	HAPLN3	0.8616	0
CD4+ T cells	ZNF485	0.8617	0
CD4+ T cells	TRAV10	0.8617	0
CD4+ T cells	PRKCI	0.8621	0
CD4+ T cells	RETREG1	0.8633	0
CD4+ T cells	FAM227B	0.8648	0
CD4+ T cells	ATG9B	0.8648	0
CD4+ T cells	NOSIP	0.8652	0
CD4+ T cells	TRAV3	0.8655	0
CD4+ T cells	PSAT1	0.8658	0
CD4+ T cells	CFAP36	0.867	0
CD4+ T cells	TFAP4	0.8673	0
CD4+ T cells	GNB1L	0.8675	0
CD4+ T cells	AMMECR1	0.8677	0
CD4+ T cells	ARL6IP4	0.868	0
CD4+ T cells	CHRM3-AS2	0.8684	0
CD4+ T cells	RNF214	0.8685	0
CD4+ T cells	TESPA1	0.8694	0
CD4+ T cells	DPH6	0.8695	0
CD4+ T cells	OGFOD1	0.8701	0
CD4+ T cells	NCKIPSD	0.8705	0
CD4+ T cells	NPHP3	0.8707	0
CD4+ T cells	LINC01550	0.8707	0
CD4+ T cells	TUBD1	0.871	0
CD4+ T cells	LRIG1	0.8717	0
CD4+ T cells	DEAF1	0.8732	0
CD4+ T cells	TMEM238	0.8732	0
CD4+ T cells	NIF3L1	0.8733	0
CD4+ T cells	MKS1	0.8747	0
CD4+ T cells	AQP3	0.8747	0
CD4+ T cells	RRS1	0.8747	0
CD4+ T cells	ZNF32-AS2	0.8753	0
CD4+ T cells	RCAN3	0.8764	0
CD4+ T cells	MDFIC	0.8767	0
CD4+ T cells	OCIAD2	0.8768	0
CD4+ T cells	ARL6	0.877	0
CD4+ T cells	PLS1	0.877	0
CD4+ T cells	TRBV5-6	0.8782	0
CD4+ T cells	TRIB2	0.8784	0
CD4+ T cells	WDR89	0.8787	0
CD4+ T cells	GBAP1	0.8787	0
CD4+ T cells	RALA	0.8796	0
CD4+ T cells	NAP1L3	0.8798	0
CD4+ T cells	LDLRAD4	0.8802	0
CD4+ T cells	NPR2	0.881	0
CD4+ T cells	PDIK1L	0.8817	0
CD4+ T cells	YAE1	0.8834	0
CD4+ T cells	THAP11	0.884	0
CD4+ T cells	MRPL55	0.8847	0
CD4+ T cells	ACVR1	0.8851	0
CD4+ T cells	USP30-AS1	0.8851	0
CD4+ T cells	ZC3H8	0.8855	0
CD4+ T cells	PHF19	0.8858	0
CD4+ T cells	NMT2	0.8859	0
CD4+ T cells	ASF1A	0.8871	0
CD4+ T cells	SGTB	0.888	0
CD4+ T cells	ACSL6	0.8886	0
CD4+ T cells	MANEA	0.8886	0
CD4+ T cells	SLC26A1	0.8892	0
CD4+ T cells	SPIN2B	0.8902	0
CD4+ T cells	ELP4	0.8904	0
CD4+ T cells	ITM2A	0.8905	0
CD4+ T cells	HABP4	0.8912	0
CD4+ T cells	TNKS1BP1	0.8926	0
CD4+ T cells	HS3ST3B1	0.8927	0
CD4+ T cells	CD27	0.8927	0
CD4+ T cells	N6AMT1	0.8927	0
CD4+ T cells	MAGEH1	0.8928	0
CD4+ T cells	ACADSB	0.8929	0
CD4+ T cells	SERINC5	0.8933	0
CD4+ T cells	LINC01089	0.8935	0
CD4+ T cells	PDCD5	0.8938	0
CD4+ T cells	ETS1	0.8947	0
CD4+ T cells	POU6F1	0.8947	0
CD4+ T cells	SUCLG2	0.895	0
CD4+ T cells	BNIP3	0.895	0
CD4+ T cells	FXN	0.8955	0
CD4+ T cells	RPS27L	0.897	0
CD4+ T cells	MCUB	0.8977	0
CD4+ T cells	GIMAP2	0.8982	0
CD4+ T cells	MTRR	0.8982	0
CD4+ T cells	BEX2	0.8986	0
CD4+ T cells	POLR2I	0.8997	0
CD4+ T cells	CCDC7	0.9003	0
CD4+ T cells	FAM162A	0.9012	0
CD4+ T cells	WDR76	0.9016	0
CD4+ T cells	PFDN4	0.9029	0
CD4+ T cells	PSIP1	0.903	0
CD4+ T cells	RASSF7	0.9037	0
CD4+ T cells	DTNB	0.904	0
CD4+ T cells	GIMAP6	0.9041	0
CD4+ T cells	PDE4DIP	0.9043	0
CD4+ T cells	MIS18A	0.9045	0
CD4+ T cells	DCAKD	0.905	0
CD4+ T cells	TNXB	0.9056	0
CD4+ T cells	CEP68	0.9059	0
CD4+ T cells	PAFAH1B3	0.9059	0
CD4+ T cells	NBDY	0.9059	0
CD4+ T cells	TRABD2A	0.9061	0
CD4+ T cells	PRKCQ-AS1	0.9064	0
CD4+ T cells	AMIGO1	0.9072	0
CD4+ T cells	SLC27A5	0.9076	0
CD4+ T cells	LINS1	0.9076	0
CD4+ T cells	TRADD	0.9079	0
CD4+ T cells	TRAV29DV5	0.9081	0
CD4+ T cells	GOT2	0.9087	0
CD4+ T cells	FAM207A	0.9088	0
CD4+ T cells	GGT7	0.9104	0
CD4+ T cells	LDHB	0.9106	0
CD4+ T cells	MAN1C1	0.9109	0
CD4+ T cells	ZNF512B	0.9112	0
CD4+ T cells	KLHL25	0.9114	0
CD4+ T cells	ADSL	0.9117	0
CD4+ T cells	SIGMAR1	0.9121	0
CD4+ T cells	ALKBH3	0.9125	0
CD4+ T cells	NSMCE1	0.9127	0
CD4+ T cells	SKA2	0.9127	0
CD4+ T cells	TTC39C	0.9135	0
CD4+ T cells	KLHL29	0.9137	0
CD4+ T cells	SIT1	0.914	0
CD4+ T cells	HSPB1	0.9145	0
CD4+ T cells	MOCS2	0.9145	0
CD4+ T cells	CD5	0.915	0
CD4+ T cells	FARSB	0.9155	0
CD4+ T cells	RPUSD2	0.9168	0
CD4+ T cells	SMIM11A	0.9168	0
CD4+ T cells	CCDC66	0.9171	0
CD4+ T cells	STMN3	0.9173	0
CD4+ T cells	TATDN1	0.9179	0
CD4+ T cells	KLHL42	0.9181	0
CD4+ T cells	CNST	0.9184	0
CD4+ T cells	DYNLT3	0.9186	0
CD4+ T cells	TRAF3IP3	0.9195	0
CD4+ T cells	RPP40	0.9197	0
CD4+ T cells	TMPRSS3	0.9197	0
CD4+ T cells	COX11	0.9197	0
CD4+ T cells	ZNRF3	0.9197	0
CD4+ T cells	TTC33	0.9198	0
CD4+ T cells	MIF	0.9199	0
CD4+ T cells	LEF1	0.92	0
CD4+ T cells	NCDN	0.9201	0
CD4+ T cells	DGKA	0.9205	0
CD4+ T cells	ZBTB46	0.921	0
CD4+ T cells	C1orf131	0.9212	0
CD4+ T cells	UBASH3A	0.9213	0
CD4+ T cells	GLUD1P3	0.9213	0
CD4+ T cells	RARS2	0.9228	0
CD4+ T cells	TIMM9	0.9231	0
CD4+ T cells	PYM1	0.9231	0
CD4+ T cells	RBL1	0.9236	0
CD4+ T cells	RGS10	0.9237	0
CD4+ T cells	FTO	0.9238	0
CD4+ T cells	HAX1	0.9255	0
CD4+ T cells	ITGA6	0.9258	0
CD4+ T cells	DUS4L	0.9258	0
CD4+ T cells	SGF29	0.9259	0
CD4+ T cells	SIRPG	0.9264	0
CD4+ T cells	MAD1L1	0.9268	0
CD4+ T cells	RELL2	0.9268	0
CD4+ T cells	SLFN5	0.9268	0
CD4+ T cells	MRI1	0.9269	0
CD4+ T cells	ARRDC1-AS1	0.927	0
CD4+ T cells	CDR2	0.9273	0
CD4+ T cells	POLR3B	0.9279	0
CD4+ T cells	OBSCN	0.9279	0
CD4+ T cells	RHNO1	0.9281	0
CD4+ T cells	HMCES	0.9291	0
CD4+ T cells	IL7R	0.9297	0
CD4+ T cells	DIMT1	0.9298	0
CD4+ T cells	MLLT3	0.9304	0
CD4+ T cells	FAM84B	0.9306	0
CD4+ T cells	TMEM191A	0.9311	0
CD4+ T cells	CDC37L1	0.9312	0
CD4+ T cells	NDRG2	0.9316	0
CD4+ T cells	GLOD4	0.9319	0
CD4+ T cells	WWP1	0.932	0
CD4+ T cells	LRRC75A-AS1	0.9322	0
CD4+ T cells	C12orf65	0.9323	0
CD4+ T cells	ZNF449	0.9334	0
CD4+ T cells	SLC7A6	0.9338	0
CD4+ T cells	SELENOM	0.9338	0
CD4+ T cells	CRBN	0.9339	0
CD4+ T cells	THYN1	0.934	0
CD4+ T cells	APBB1	0.9341	0
CD4+ T cells	CRTC3	0.935	0
CD4+ T cells	TCF7	0.9358	0
CD4+ T cells	TRAV12-1	0.9358	0
CD4+ T cells	CD2	0.9366	0
CD4+ T cells	NIPAL3	0.9368	0
CD4+ T cells	CUTA	0.9374	0
CD4+ T cells	FLT3LG	0.9377	0
CD4+ T cells	ATXN7L1	0.9377	0
CD4+ T cells	SOD1	0.9378	0
CD4+ T cells	MZT2A	0.938	0
CD4+ T cells	SELENOW	0.9396	0
CD4+ T cells	TSPAN5	0.94	0
CD4+ T cells	FAHD2A	0.9406	0
CD4+ T cells	TUBE1	0.9407	0
CD4+ T cells	CACYBP	0.9413	0
CD4+ T cells	CPOX	0.9415	0
CD4+ T cells	SAYSD1	0.9416	0
CD4+ T cells	LMF1	0.9417	0
CD4+ T cells	ANKH	0.9419	0
CD4+ T cells	BTRC	0.942	0
CD4+ T cells	ACAP1	0.9421	0
CD4+ T cells	SH2D3A	0.9422	0
CD4+ T cells	ADD3	0.9427	0
CD4+ T cells	CCR7	0.9428	0
CD4+ T cells	DDX50	0.943	0
CD4+ T cells	ANP32B	0.9432	0
CD4+ T cells	METTL2A	0.9435	0
CD4+ T cells	PRDX2	0.9436	0
CD4+ T cells	PDCD7	0.9438	0
CD4+ T cells	UXS1	0.9441	0
CD4+ T cells	USP54	0.9451	0
CD4+ T cells	CD6	0.9453	0
CD4+ T cells	AIMP1	0.9454	0
CD4+ T cells	TECPR1	0.9458	0
CD4+ T cells	MORC2	0.946	0
CD4+ T cells	MRTFB	0.9461	0
CD4+ T cells	SLAIN1	0.9463	0
CD4+ T cells	PCED1B-AS1	0.948	0
CD4+ T cells	LEPROTL1	0.9482	0
CD4+ T cells	FAF1	0.9482	0
CD4+ T cells	EIF3E	0.9497	0
CD4+ T cells	LETMD1	0.9508	0
CD4+ T cells	COX10	0.951	0
CD4+ T cells	TDP1	0.9511	0
CD4+ T cells	ZNF483	0.9518	0
CD4+ T cells	SEPT6	0.9526	0
CD4+ T cells	C15orf41	0.9538	0
CD4+ T cells	RRM1	0.9539	0
CD4+ T cells	S1PR1	0.9545	0
CD4+ T cells	TRAPPC6A	0.9546	0
CD4+ T cells	BCKDHB	0.9546	0
CD4+ T cells	CCDC25	0.9559	0
CD4+ T cells	MTA3	0.956	0
CD4+ T cells	KIF2A	0.9574	0
CD4+ T cells	TPT1	0.958	0
CD4+ T cells	MCF2L	0.9585	0
CD4+ T cells	RPL36	0.9592	0
CD4+ T cells	REV1	0.9594	0
CD4+ T cells	PEBP1	0.9596	0
CD4+ T cells	CEP57	0.961	0
CD4+ T cells	SATB1	0.9611	0
CD4+ T cells	TMC8	0.9619	0
CD4+ T cells	COX7C	0.9621	0
CD4+ T cells	ZBTB25	0.9624	0
CD4+ T cells	TRBC2	0.9624	0
CD4+ T cells	POLR1E	0.9627	0
CD4+ T cells	ANKMY1	0.9627	0
CD4+ T cells	LCMT1	0.9627	0
CD4+ T cells	C12orf57	0.9628	0
CD4+ T cells	SFXN1	0.963	0
CD4+ T cells	RASGRP1	0.9631	0
CD4+ T cells	NSA2	0.9637	0
CD4+ T cells	C6orf48	0.9643	0
CD4+ T cells	FBXO25	0.9645	0
CD4+ T cells	MFNG	0.9646	0
CD4+ T cells	RANBP9	0.9652	0
CD4+ T cells	CCDC91	0.9656	0
CD4+ T cells	RPS13	0.9658	0
CD4+ T cells	SERGEF	0.9676	0
CD4+ T cells	RPL22	0.9678	0
CD4+ T cells	PSMC5	0.9685	0
CD4+ T cells	RPL38	0.9689	0
CD4+ T cells	RPL35A	0.9698	0
CD4+ T cells	EXOC6B	0.9699	0
CD4+ T cells	PDE7A	0.9703	0
CD4+ T cells	SMG6	0.9705	0
CD4+ T cells	SEPT9	0.9707	0
CD4+ T cells	IKZF1	0.9722	0
CD4+ T cells	RPS16	0.9728	0
CD4+ T cells	OXCT1	0.9732	0
CD4+ T cells	TOMM70	0.9734	0
CD4+ T cells	SNRPD2	0.974	0
CD4+ T cells	GSTK1	0.974	0
CD4+ T cells	RPL32	0.9752	0
CD4+ T cells	RPL5	0.9756	0
CD4+ T cells	EVL	0.9766	0
CD4+ T cells	RPL30	0.9767	0
CD4+ T cells	RPL11	0.9774	0
CD4+ T cells	APRT	0.9777	0
CD4+ T cells	AES	0.9798	0
CD4+ T cells	CTC1	0.9816	0
CD4+ T cells	CMPK1	0.9818	0
CD4+ T cells	URI1	0.9819	0
CD4+ T cells	TMEM173	0.9829	0
CD4+ T cells	CCNG1	0.9838	0
CD4+ T cells	RPS3	0.9841	0
CD4+ T cells	OTUB2	1	0
CD4+ T cells	BBOF1	1	0
CD4+ T cells	CHCHD6	1	0
CD4+ T cells	TMEM99	1	0
CD4+ T cells	GPR89B	1	0
CD8+ T cells	SHANK1	0	0
CD8+ T cells	ANAPC1P1	0	0
CD8+ T cells	CD8B2	0	0
CD8+ T cells	SFRP5	0.0511	0
CD8+ T cells	DKK3	0.0515	0
CD8+ T cells	GATA6	0.0642	0
CD8+ T cells	REG4	0.0692	0
CD8+ T cells	MAGI2-AS3	0.0774	0
CD8+ T cells	SHC2	0.0869	0
CD8+ T cells	LINC02446	0.0898	0
CD8+ T cells	TRGV2	0.1195	0
CD8+ T cells	CD8A	0.1422	0
CD8+ T cells	SH3BGRL2	0.1428	0
CD8+ T cells	RTP5	0.1817	0
CD8+ T cells	CD8B	0.2026	0
CD8+ T cells	TNIP3	0.2984	0
CD8+ T cells	LAG3	0.3121	0
CD8+ T cells	SLC4A10	0.344	0
CD8+ T cells	NRCAM	0.351	0
CD8+ T cells	FGF9	0.3573	0
CD8+ T cells	FOXJ1	0.3672	0
CD8+ T cells	CD248	0.3794	0
CD8+ T cells	PHGDH	0.3821	0
CD8+ T cells	TRGV5	0.3843	0
CD8+ T cells	TPRG1	0.3946	0
CD8+ T cells	SLC7A8	0.3964	0
CD8+ T cells	GLIS3	0.434	0
CD8+ T cells	COL5A1	0.4465	0
CD8+ T cells	MTSS1L	0.4757	0
CD8+ T cells	ROBO1	0.4772	0
CD8+ T cells	GFPT2	0.4811	0
CD8+ T cells	KCNK5	0.4816	0
CD8+ T cells	DPY19L2	0.4896	0
CD8+ T cells	ASIC1	0.5042	0
CD8+ T cells	RASD2	0.5112	0
CD8+ T cells	YPEL4	0.5213	0
CD8+ T cells	PLCG1-AS1	0.5671	0
CD8+ T cells	ARHGEF4	0.5789	0
CD8+ T cells	ERBB3	0.5803	0
CD8+ T cells	LTK	0.6131	0
CD8+ T cells	DSEL	0.6274	0
CD8+ T cells	NT5C1B	0.6309	0
CD8+ T cells	MTND5P11	0.6309	0
CD8+ T cells	SOAT2	0.636	0
CD8+ T cells	AMDHD1	0.6452	0
CD8+ T cells	SLC7A5	0.6559	0
CD8+ T cells	SCART1	0.6576	0
CD8+ T cells	KLRA1P	0.6658	0
CD8+ T cells	FLT4	0.6661	0
CD8+ T cells	PTK7	0.6678	0
CD8+ T cells	TRGV4	0.67	0
CD8+ T cells	CRTAM	0.679	0
CD8+ T cells	GZMK	0.6827	0
CD8+ T cells	TRBV4-1	0.6907	0
CD8+ T cells	PCSK1N	0.6953	0
CD8+ T cells	MEST	0.7102	0
CD8+ T cells	ANXA2R	0.7243	0
CD8+ T cells	CFAP20	0.7252	0
CD8+ T cells	TTC16	0.7261	0
CD8+ T cells	CAMK2N1	0.7322	0
CD8+ T cells	ZNF662	0.7388	0
CD8+ T cells	KLRG1	0.7459	0
CD8+ T cells	TMEM117	0.7651	0
CD8+ T cells	TRGC2	0.7769	0
CD8+ T cells	C1orf198	0.7793	0
CD8+ T cells	METTL1	0.7856	0
CD8+ T cells	GOLGA2P7	0.786	0
CD8+ T cells	IFT140	0.793	0
CD8+ T cells	PPM1N	0.7948	0
CD8+ T cells	KRT8P33	0.7959	0
CD8+ T cells	STXBP1	0.7973	0
CD8+ T cells	LYAR	0.7981	0
CD8+ T cells	FDXACB1	0.8201	0
CD8+ T cells	PNMA1	0.8216	0
CD8+ T cells	HSPH1	0.8248	0
CD8+ T cells	KLHL26	0.8364	0
CD8+ T cells	CXCR3	0.8387	0
CD8+ T cells	MVB12B	0.8393	0
CD8+ T cells	CELSR3	0.8395	0
CD8+ T cells	FZD3	0.8409	0
CD8+ T cells	ZNF331	0.8422	0
CD8+ T cells	KPNA2	0.8482	0
CD8+ T cells	MFSD6	0.859	0
CD8+ T cells	HAGHL	0.86	0
CD8+ T cells	TSPYL2	0.8608	0
CD8+ T cells	FOXO3B	0.8617	0
CD8+ T cells	ADNP2	0.8621	0
CD8+ T cells	SCNN1D	0.865	0
CD8+ T cells	TSPYL4	0.8696	0
CD8+ T cells	POLR1C	0.8706	0
CD8+ T cells	GPR132	0.8714	0
CD8+ T cells	COL6A2	0.8759	0
CD8+ T cells	FBXO32	0.8775	0
CD8+ T cells	PPAN	0.8806	0
CD8+ T cells	WNT10B	0.8826	0
CD8+ T cells	NLGN2	0.8839	0
CD8+ T cells	CD84	0.8864	0
CD8+ T cells	DHCR7	0.8867	0
CD8+ T cells	GRWD1	0.889	0
CD8+ T cells	FBXL14	0.8895	0
CD8+ T cells	SLC25A30	0.8904	0
CD8+ T cells	ARHGAP35	0.8908	0
CD8+ T cells	CCDC78	0.8928	0
CD8+ T cells	ZSCAN25	0.8952	0
CD8+ T cells	JMY	0.8955	0
CD8+ T cells	CEP41	0.8982	0
CD8+ T cells	PER1	0.8984	0
CD8+ T cells	ZNF496	0.8993	0
CD8+ T cells	ZFP41	0.9006	0
CD8+ T cells	SNHG17	0.9028	0
CD8+ T cells	WDR54	0.904	0
CD8+ T cells	DPY19L2P2	0.9059	0
CD8+ T cells	FYCO1	0.9074	0
CD8+ T cells	TSPYL1	0.9086	0
CD8+ T cells	THEMIS	0.9105	0
CD8+ T cells	SRPRB	0.9113	0
CD8+ T cells	USP42	0.9121	0
CD8+ T cells	G3BP2	0.9127	0
CD8+ T cells	GADD45A	0.9176	0
CD8+ T cells	GUK1	0.9233	0
CD8+ T cells	TNRC6C	0.9237	0
CD8+ T cells	FAM173A	0.9252	0
CD8+ T cells	P2RY11	0.9265	0
CD8+ T cells	MED15	0.9328	0
CD8+ T cells	RNF139	0.9329	0
CD8+ T cells	GRAP2	0.9358	0
CD8+ T cells	SRM	0.9375	0
CD8+ T cells	B4GALT3	0.9418	0
CD8+ T cells	KTI12	0.9432	0
CD8+ T cells	CCSER2	0.9442	0
CD8+ T cells	UFC1	0.9444	0
CD8+ T cells	C1orf159	0.9486	0
CD8+ T cells	AEBP2	0.9494	0
CD8+ T cells	ATG16L1	0.95	0
CD8+ T cells	MIGA2	0.9504	0
CD8+ T cells	ZNF827	0.951	0
CD8+ T cells	PRR5	0.9528	0
CD8+ T cells	GSPT1	0.9546	0
CD8+ T cells	THRA	0.9548	0
CD8+ T cells	NGDN	0.9559	0
CD8+ T cells	ZBTB4	0.9576	0
CD8+ T cells	BCL9L	0.9578	0
CD8+ T cells	FBXW4	0.9586	0
CD8+ T cells	PRPF8	0.9604	0
CD8+ T cells	TBC1D10A	0.9624	0
CD8+ T cells	REXO1	0.9635	0
CD8+ T cells	DDX51	0.9639	0
CD8+ T cells	SETD1A	0.9644	0
CD8+ T cells	KIF22	0.9674	0
CD8+ T cells	TMEM201	0.9683	0
CD8+ T cells	USP36	0.9694	0
CD8+ T cells	TMEM120B	0.9755	0
CD8+ T cells	TPP2	0.9767	0
CD8+ T cells	GALNT11	0.9786	0
CD8+ T cells	DVL1	0.9801	0
CD8+ T cells	TMED4	0.9835	0
CD8+ T cells	FPGS	0.9896	0
CD8+ T cells	ZNF80	1	0
CD8+ T cells	GINS3	1	0
Monocytes	SLC22A16	0	0
Monocytes	MARCO	0	0
Monocytes	CD209	0	0
Monocytes	NRP1	0	0
Monocytes	SEZ6L	0	0
Monocytes	TNNT1	0	0
Monocytes	ABCC3	0	0
Monocytes	MS4A4A	0	0
Monocytes	TRPV4	0	0
Monocytes	PRLR	0	0
Monocytes	MMP19	0	0
Monocytes	CDC42EP1	0	0
Monocytes	TRPM4	0	0
Monocytes	OLFM1	0	0
Monocytes	RXFP2	0	0
Monocytes	EPHB2	0	0
Monocytes	GPNMB	0	0
Monocytes	FXYD6	0	0
Monocytes	CXCL9	0	0
Monocytes	GAS2L3	0	0
Monocytes	ACVRL1	0	0
Monocytes	STON2	0	0
Monocytes	ASGR1	0	0
Monocytes	KCNMB1	0	0
Monocytes	PLA2G7	0	0
Monocytes	LRMDA	0	0
Monocytes	HTR7	0	0
Monocytes	HNMT	0	0
Monocytes	DOCK1	0	0
Monocytes	KCNK13	0	0
Monocytes	SPOCK1	0	0
Monocytes	ADAMTS5	0	0
Monocytes	NRG1	0	0
Monocytes	CACNA2D3	0	0
Monocytes	MRAS	0	0
Monocytes	ASGR2	0	0
Monocytes	ZG16B	0	0
Monocytes	OLFML2B	0	0
Monocytes	IL31RA	0	0
Monocytes	ZNF503	0	0
Monocytes	HTRA1	0	0
Monocytes	CYP2S1	0	0
Monocytes	CXCL10	0	0
Monocytes	UTF1	0	0
Monocytes	C1QB	0	0
Monocytes	C1QA	0	0
Monocytes	DES	0	0
Monocytes	C1orf127	0	0
Monocytes	LDLRAD3	0	0
Monocytes	ALOX15B	0	0
Monocytes	TDRD6	0	0
Monocytes	CLEC4G	0	0
Monocytes	FPR3	0	0
Monocytes	SIGLEC15	0	0
Monocytes	DDO	0	0
Monocytes	RNU6-1024P	0	0
Monocytes	RPL7AP64	0	0
Monocytes	CROCC2	0	0
Monocytes	ST7-AS1	0	0
Monocytes	SLC9A7P1	0	0
Monocytes	FAM225A	0	0
Monocytes	LINC01637	0	0
Monocytes	LINC02432	0	0
Monocytes	LGALS2	0.009	0
Monocytes	TMEM176A	0.0097	0
Monocytes	MYOF	0.0103	0
Monocytes	PID1	0.0103	0
Monocytes	NID1	0.0133	0
Monocytes	MSR1	0.0145	1
Monocytes	MITF	0.0193	0
Monocytes	CLEC10A	0.02	0
Monocytes	TMEM176B	0.0217	0
Monocytes	SDSL	0.0286	0
Monocytes	SERPINB2	0.0287	0
Monocytes	SHTN1	0.0291	0
Monocytes	LDHD	0.0292	0
Monocytes	JPH4	0.0301	0
Monocytes	MIR221	0.0304	0
Monocytes	RIN2	0.0331	0
Monocytes	FLT3	0.0348	0
Monocytes	LILRB4	0.0364	0
Monocytes	CPVL	0.0385	0
Monocytes	MYCL	0.0388	0
Monocytes	OSR2	0.0405	0
Monocytes	SMOX	0.041	0
Monocytes	RAB44	0.0457	0
Monocytes	FAM198B	0.0466	0
Monocytes	ANG	0.0482	0
Monocytes	S1PR3	0.0486	0
Monocytes	F3	0.0519	0
Monocytes	CD36	0.0538	0
Monocytes	TCN2	0.0573	0
Monocytes	UPK3A	0.0589	0
Monocytes	GAS2L1	0.0602	0
Monocytes	STAB1	0.061	0
Monocytes	MS4A4E	0.0622	0
Monocytes	ITIH1	0.0642	0
Monocytes	COL8A2	0.0654	0
Monocytes	CDKN2B	0.0662	0
Monocytes	TMEM150B	0.0665	0
Monocytes	LAMB2	0.0679	0
Monocytes	CD163	0.0706	1
Monocytes	CTTNBP2NL	0.0716	0
Monocytes	EMP1	0.0765	0
Monocytes	MTMR11	0.0768	0
Monocytes	SH3PXD2B	0.0785	0
Monocytes	CRYZL2P	0.0799	0
Monocytes	FZD1	0.0821	0
Monocytes	MERTK	0.0837	0
Monocytes	CES1	0.0842	0
Monocytes	FAM20C	0.0843	0
Monocytes	PHLDA2	0.0844	0
Monocytes	CD300E	0.0859	0
Monocytes	SNCA	0.0871	0
Monocytes	SPARC	0.0872	0
[truncated: 4,917 more rows]

## Sheet: Tissues
sample_type	predicted_marker	specificity_score	reported_marker
Bone marrow	IFIT1B	0.0046	0
Bone marrow	DEFA8P	0.0065	0
Bone marrow	PPIAP51	0.0105	0
Bone marrow	RN7SL34P	0.0114	0
Bone marrow	TSPO2	0.0123	0
Bone marrow	PRSS57	0.0145	0
Bone marrow	HBM	0.0159	0
Bone marrow	HNRNPA1P68	0.018	0
Bone marrow	KLF1	0.0192	0
Bone marrow	DNTT	0.0198	0
Bone marrow	PRG3	0.0199	0
Bone marrow	GYPB	0.0211	1
Bone marrow	TARM1	0.0215	0
Bone marrow	PRTN3	0.0233	0
Bone marrow	SERPINB10	0.0257	0
Bone marrow	EPX	0.0266	1
Bone marrow	DDX18P1	0.0283	0
Bone marrow	CEACAM8	0.0291	0
Bone marrow	MTND4LP7	0.0294	0
Bone marrow	GYPA	0.0313	1
Bone marrow	ELANE	0.0351	0
Bone marrow	MS4A3	0.0353	1
Bone marrow	SNORD3B-1	0.0353	0
Bone marrow	MMP8	0.0361	0
Bone marrow	PPIAP40	0.0361	0
Bone marrow	GATA1	0.0379	0
Bone marrow	HBD	0.0388	0
Bone marrow	ALAS2	0.0389	0
Bone marrow	CEBPE	0.0397	0
Bone marrow	DEFA4	0.0407	0
Bone marrow	VSTM1	0.0418	0
Bone marrow	AZU1	0.0425	0
Bone marrow	RNASE3	0.0426	0
Bone marrow	EREG	0.0438	0
Bone marrow	CCL7	0.0482	0
Bone marrow	CA1	0.0484	0
Bone marrow	SNORD97	0.0509	0
Bone marrow	RSF1-IT2	0.0512	0
Bone marrow	RHAG	0.054	0
Bone marrow	SERPINB2	0.0541	0
Bone marrow	MPO	0.0545	0
Bone marrow	PRG2	0.0548	0
Bone marrow	RPS15AP30	0.0563	0
Bone marrow	AHSP	0.0564	0
Bone marrow	MFSD2B	0.0579	0
Bone marrow	DUTP1	0.0604	0
Bone marrow	SNORD3B-2	0.0625	0
Bone marrow	NAP1L4P1	0.0635	0
Bone marrow	TCN1	0.0637	0
Bone marrow	ALMS1-IT1	0.0678	0
Bone marrow	MIR181A1HG	0.0686	0
Bone marrow	MTND4P15	0.0704	0
Bone marrow	PRRT4	0.074	0
Bone marrow	ABCA13	0.0742	0
Bone marrow	RGS17P1	0.0745	0
Bone marrow	RHD	0.0769	1
Bone marrow	LINC00570	0.0791	0
Bone marrow	ASTL	0.0808	0
Bone marrow	SLC28A3	0.082	0
Bone marrow	PGLYRP1	0.0832	0
Bone marrow	CRISP3	0.0853	0
Bone marrow	FBXW4P1	0.0869	0
Bone marrow	RNASE2	0.0925	0
Bone marrow	KLF7-IT1	0.093	0
Bone marrow	GPR84	0.0948	0
Bone marrow	CAMP	0.0972	0
Bone marrow	CLEC4D	0.0998	0
Bone marrow	PABPC1P3	0.1035	0
Bone marrow	RN7SL368P	0.1049	0
Bone marrow	CTSG	0.1068	0
Bone marrow	AREG	0.108	0
Bone marrow	NMU	0.1091	0
Bone marrow	PRDX3P1	0.1104	0
Bone marrow	LGALS12	0.1129	0
Bone marrow	FCAR	0.1129	0
Bone marrow	RNVU1-14	0.1133	0
Bone marrow	LPO	0.1192	0
Bone marrow	CLC	0.1193	1
Bone marrow	HIST2H2AC	0.1199	0
Bone marrow	RPS20P22	0.1204	0
Bone marrow	HIST1H1D	0.1221	0
Bone marrow	EIF4EP1	0.1241	0
Bone marrow	HTRA4	0.1243	0
Bone marrow	HBG2	0.1245	0
Bone marrow	ACTG1P3	0.1247	0
Bone marrow	TRPC2	0.1248	0
Bone marrow	PIGHP1	0.1253	0
Bone marrow	RAB44	0.1287	0
Bone marrow	NPM1P26	0.1324	0
Bone marrow	GFI1B	0.1331	0
Bone marrow	LINC01619	0.1356	0
Bone marrow	LDHAP2	0.1357	0
Bone marrow	NARF-IT1	0.1377	0
Bone marrow	HIST1H1E	0.1379	0
Bone marrow	ADGRG3	0.1387	0
Bone marrow	CEACAM3	0.1395	0
Bone marrow	CLEC5A	0.1414	0
Bone marrow	PADI4	0.1458	0
Bone marrow	CCDC26	0.1458	0
Bone marrow	HIST1H2BL	0.1469	0
Bone marrow	BCL2L15	0.1476	0
Bone marrow	RHCE	0.1492	1
Bone marrow	CR1L	0.1504	0
Bone marrow	CNN2P1	0.1536	0
Bone marrow	SLC12A5-AS1	0.1581	0
Bone marrow	EPHA1-AS1	0.1584	0
Bone marrow	S100A12	0.1601	0
Bone marrow	HM13-IT1	0.1613	0
Bone marrow	GYPE	0.1624	0
Bone marrow	RPS10P5	0.1639	0
Bone marrow	OSM	0.1755	0
Bone marrow	S100P	0.1755	0
Bone marrow	UBE2FP1	0.1756	0
Bone marrow	HNRNPA1P49	0.1757	0
Bone marrow	GPR141	0.1759	0
Bone marrow	RFX8	0.1762	0
Bone marrow	LUCAT1	0.1824	0
Bone marrow	HIST1H3D	0.1916	0
Bone marrow	PROK2	0.194	0
Bone marrow	CNTF	0.1945	0
Bone marrow	VPREB1	0.1997	0
Bone marrow	RPS12P28	0.1999	0
Bone marrow	REM2	0.2002	0
Bone marrow	CD44-AS1	0.2008	0
Bone marrow	MTRNR2L8	0.204	0
Bone marrow	SPTA1	0.2077	0
Bone marrow	CXCL8	0.21	1
Bone marrow	CD300E	0.2102	0
Bone marrow	APOBEC3A	0.2143	0
Bone marrow	RNU2-2P	0.2145	0
Bone marrow	SPNS3	0.215	0
Bone marrow	MPIG6B	0.218	0
Bone marrow	POC1B-GALNT4	0.2197	0
Bone marrow	E2F7	0.2207	0
Bone marrow	PSMD6-AS2	0.2229	0
Bone marrow	LINC00852	0.2238	0
Bone marrow	NLRP3	0.2256	0
Bone marrow	UGT3A2	0.2339	0
Bone marrow	CD300LB	0.2363	0
Bone marrow	LTF	0.241	0
Bone marrow	EPB42	0.2524	0
Bone marrow	APOBEC3B	0.2532	0
Bone marrow	CFLAR-AS1	0.2538	0
Bone marrow	SEMA3F-AS1	0.2563	0
Bone marrow	C3orf35	0.2573	0
Bone marrow	ITGA2B	0.2598	1
Bone marrow	NOD2	0.2603	0
Bone marrow	FTH1P16	0.2612	0
Bone marrow	BRCA2	0.2656	0
Bone marrow	FUT4	0.2662	1
Bone marrow	LINC02019	0.2703	0
Bone marrow	DFFBP1	0.2721	0
Bone marrow	BCL2A1	0.2799	0
Bone marrow	CALM2P2	0.2863	0
Bone marrow	ACTG1P20	0.287	0
Bone marrow	FAM41C	0.2899	0
Bone marrow	FCN1	0.2914	0
Bone marrow	S100Z	0.2921	0
Bone marrow	SLC22A4	0.2937	0
Bone marrow	TMPPE	0.2939	0
Bone marrow	HYAL3	0.2955	0
Bone marrow	MIR222HG	0.2979	0
Bone marrow	EBLN2	0.2987	0
Bone marrow	S100A8	0.3029	1
Bone marrow	SH3GL1P1	0.3064	0
Bone marrow	ZNF850	0.3095	0
Bone marrow	BMS1P4	0.3107	0
Bone marrow	LCN2	0.3111	0
Bone marrow	IL1B	0.3217	0
Bone marrow	EMC3-AS1	0.3262	0
Bone marrow	POLE2	0.3286	0
Bone marrow	C5orf66	0.3351	0
Bone marrow	ATP8B4	0.3371	0
Bone marrow	PRPS1P2	0.3372	0
Bone marrow	SMG1P3	0.3377	0
Bone marrow	DPP9-AS1	0.3429	0
Bone marrow	BPI	0.3434	0
Bone marrow	SIRPB1	0.3445	1
Bone marrow	MROH6	0.3472	0
Bone marrow	S100A9	0.3505	1
Bone marrow	MXD1	0.3516	0
Bone marrow	BST1	0.3563	0
Bone marrow	DEFA3	0.3589	0
Bone marrow	PLAUR	0.3606	0
Bone marrow	DTL	0.3608	0
Bone marrow	SMG1P2	0.3667	0
Bone marrow	C17orf99	0.3706	0
Bone marrow	ZHX1-C8orf76	0.3734	0
Bone marrow	HBB	0.3735	1
Bone marrow	C19orf38	0.3754	0
Bone marrow	FAM151B	0.3763	0
Bone marrow	YOD1	0.3789	0
Bone marrow	TRIM58	0.3803	0
Bone marrow	NRROS	0.3842	0
Bone marrow	NFE2	0.3844	0
Bone marrow	RPS15AP10	0.3875	0
Bone marrow	FAM157C	0.3891	0
Bone marrow	SREBF2-AS1	0.3923	0
Bone marrow	AMMECR1	0.3926	0
Bone marrow	RFLNB	0.3928	0
Bone marrow	SMG1P1	0.3936	0
Bone marrow	TRIM10	0.395	0
Bone marrow	RAD51AP1	0.3965	1
Bone marrow	SAPCD1	0.3986	0
Bone marrow	CHMP4BP1	0.4079	0
Bone marrow	DUSP2	0.4082	0
Bone marrow	PTGER2	0.4183	0
Bone marrow	AMIGO3	0.4184	0
Bone marrow	ZC3H12A	0.4189	0
Bone marrow	SPIN4	0.4207	0
Bone marrow	NPIPB13	0.4238	0
Bone marrow	LTB4R	0.4256	0
Bone marrow	HMBS	0.4257	0
Bone marrow	P2RX1	0.429	0
Bone marrow	INO80D	0.4328	0
Bone marrow	TET3	0.4335	0
Bone marrow	SHLD3	0.4391	0
Bone marrow	HCST	0.4421	0
Bone marrow	SPHK1	0.4442	0
Bone marrow	LPCAT2	0.4452	0
Bone marrow	IQGAP3	0.4506	1
Bone marrow	SNHG26	0.453	0
Bone marrow	ZGRF1	0.4535	0
Bone marrow	RBM15	0.4544	0
Bone marrow	TET2	0.4588	0
Bone marrow	MTF1	0.4597	0
Bone marrow	PLK3	0.4605	0
Bone marrow	RELB	0.463	0
Bone marrow	RRP12	0.4644	0
Bone marrow	PRAM1	0.4663	0
Bone marrow	TNFAIP3	0.4664	0
Bone marrow	PELI1	0.4669	0
Bone marrow	NR4A2	0.4682	0
Bone marrow	WHAMMP2	0.4706	0
Bone marrow	WHAMM	0.4727	0
Bone marrow	RIPK2	0.4731	0
Bone marrow	NFKBIZ	0.4735	0
Bone marrow	UPP1	0.4735	0
Bone marrow	FAM201A	0.4745	0
Bone marrow	TYMS	0.4749	0
Bone marrow	RGL4	0.4778	0
Bone marrow	CST7	0.4792	0
Bone marrow	GNA15	0.4793	0
Bone marrow	ANKLE1	0.4798	0
Bone marrow	C5AR1	0.4815	0
Bone marrow	STAC3	0.4827	0
Bone marrow	GFI1	0.486	1
Bone marrow	CLCF1	0.4861	0
Bone marrow	CDT1	0.4878	0
Bone marrow	PIGA	0.4903	0
Bone marrow	ITPRIP	0.4939	0
Bone marrow	SRGN	0.4987	0
Bone marrow	ATG2A	0.5005	0
Bone marrow	RELT	0.5009	0
Bone marrow	CBX4	0.5037	0
Bone marrow	CHST11	0.5039	0
Bone marrow	RETN	0.5044	0
Bone marrow	GAS2L3	0.5059	0
Bone marrow	PHBP9	0.5067	0
Bone marrow	ZNF714	0.5076	0
Bone marrow	CDKN2D	0.5079	0
Bone marrow	IL17RA	0.5081	0
Bone marrow	ASH1L-AS1	0.511	0
Bone marrow	NKAPP1	0.5136	0
Bone marrow	SERPINB1	0.5166	1
Bone marrow	AP5B1	0.5175	0
Bone marrow	CSTA	0.519	0
Bone marrow	ARMC5	0.5191	0
Bone marrow	PIM1	0.5218	0
Bone marrow	MBOAT2	0.5218	0
Bone marrow	BMF	0.524	0
Bone marrow	ZNF805	0.5261	0
Bone marrow	RAP2B	0.527	0
Bone marrow	TFRC	0.5283	0
Bone marrow	CENPN	0.5302	0
Bone marrow	PLEKHM1P1	0.5309	0
Bone marrow	FBXO33	0.5315	0
Bone marrow	MXD3	0.5321	0
Bone marrow	NPIPB3	0.5327	0
Bone marrow	HEMGN	0.5352	0
Bone marrow	ITGAM	0.5361	1
Bone marrow	PTPRE	0.5362	0
Bone marrow	MYB	0.5397	1
Bone marrow	ZNF273	0.5401	0
Bone marrow	AGO2	0.5403	0
Bone marrow	SNHG17	0.5424	0
Bone marrow	HBA1	0.5431	0
Bone marrow	AMPD2	0.5436	0
Bone marrow	P2RY2	0.5439	0
Bone marrow	LINC00843	0.5439	0
Bone marrow	RLF	0.5452	0
Bone marrow	TMEM91	0.5452	0
Bone marrow	CSRNP1	0.5458	0
Bone marrow	CLEC11A	0.5467	0
Bone marrow	GRASP	0.5468	0
Bone marrow	ZEB2-AS1	0.5468	0
Bone marrow	TENT5C	0.547	0
Bone marrow	GCA	0.5479	0
Bone marrow	ETV6	0.5485	0
Bone marrow	LPAR2	0.5502	0
Bone marrow	VCPKMT	0.5509	0
Bone marrow	ATP2B1-AS1	0.5509	0
Bone marrow	FOSL2	0.552	0
Bone marrow	ANKRD28	0.5522	0
Bone marrow	ATXN1	0.5526	0
Bone marrow	HAUS2	0.5533	0
Bone marrow	TVP23C	0.5569	0
Bone marrow	ARHGAP4	0.557	0
Bone marrow	ARHGAP27P1-BPTFP1-KPNA2P3	0.5571	0
Bone marrow	LYST	0.5574	0
Bone marrow	H1FX	0.5576	0
Bone marrow	HBA2	0.5586	0
Bone marrow	TOR2A	0.559	0
Bone marrow	CD99P1	0.5593	0
Bone marrow	LY6G5B	0.5602	0
Bone marrow	EPOR	0.5603	0
Bone marrow	CSGALNACT2	0.5604	0
Bone marrow	WRN	0.5623	0
Bone marrow	E2F2	0.5628	0
Bone marrow	PLP2	0.5628	0
Bone marrow	UBALD2	0.5629	0
Bone marrow	ZNF394	0.5644	0
Bone marrow	PPP1R15A	0.5646	0
Bone marrow	ZNF674-AS1	0.5655	0
Bone marrow	RRN3P2	0.5656	0
Bone marrow	HELZ	0.5656	0
Bone marrow	MFSD9	0.567	0
Bone marrow	TSPO	0.5679	0
Bone marrow	CHAF1A	0.5683	0
Bone marrow	LRRC37B	0.5692	0
Bone marrow	NXT1	0.5699	0
Bone marrow	ZDHHC18	0.5702	0
Bone marrow	ABCB10	0.5714	0
Bone marrow	TAL1	0.5724	0
Bone marrow	DEDD2	0.5733	1
Bone marrow	EPC1	0.5748	0
Bone marrow	TSPAN32	0.5751	0
Bone marrow	SERTAD2	0.5755	0
Bone marrow	REC8	0.5764	0
Bone marrow	FANCB	0.5799	0
Bone marrow	FEM1C	0.5801	0
Bone marrow	HELB	0.5808	0
Bone marrow	PDE4D	0.5844	0
Bone marrow	CHD1	0.5845	0
Bone marrow	USP3	0.5848	0
Bone marrow	GLA	0.5854	0
Bone marrow	CLEC12A	0.5862	0
Bone marrow	SPTY2D1	0.5866	0
Bone marrow	NAA16	0.5871	0
Bone marrow	PTGER4	0.5874	0
Bone marrow	MAP3K8	0.5883	0
Bone marrow	ARID5A	0.5886	0
Bone marrow	ZNF669	0.5887	0
Bone marrow	B9D2	0.5893	0
Bone marrow	TENT5A	0.5895	0
Bone marrow	CDCA4	0.5906	0
Bone marrow	CREBRF	0.5907	0
Bone marrow	ZNF800	0.5908	0
Bone marrow	KLHL28	0.5926	0
Bone marrow	ZNF408	0.5931	0
Bone marrow	ATG14	0.5939	0
Bone marrow	SNX18	0.5944	0
Bone marrow	OTULIN	0.5966	0
Bone marrow	VTI1A	0.597	0
Bone marrow	LRRC57	0.5974	0
Bone marrow	MFSD10	0.5976	0
Bone marrow	TRIM11	0.5977	0
Bone marrow	C12orf29	0.5993	0
Bone marrow	ZBTB17	0.5994	0
Bone marrow	TLE3	0.6	0
Bone marrow	NFKBIE	0.6	0
Bone marrow	PXN-AS1	0.6002	0
Bone marrow	RC3H1	0.6007	0
Bone marrow	BIN3	0.6007	0
Bone marrow	CLP1	0.6017	0
Bone marrow	PTX3	0.6025	0
Bone marrow	FAM178B	0.6028	0
Bone marrow	RABGEF1	0.6039	0
Bone marrow	CCNE1	0.605	0
Bone marrow	LRP5L	0.6057	0
Bone marrow	IGF2BP2	0.6065	0
Bone marrow	MIER1	0.607	0
Bone marrow	RCOR1	0.6072	0
Bone marrow	JMJD6	0.6081	0
Bone marrow	XKR8	0.6081	0
Bone marrow	TYW5	0.6083	0
Bone marrow	RANBP10	0.6084	0
Bone marrow	EPG5	0.609	0
Bone marrow	GTPBP1	0.612	0
Bone marrow	IER5	0.6121	0
Bone marrow	KDM6A	0.6122	0
Bone marrow	CARD19	0.6127	0
Bone marrow	H3F3AP4	0.6127	0
Bone marrow	HIF1A	0.6133	0
Bone marrow	GGTA1P	0.6135	0
Bone marrow	PROSER1	0.614	0
Bone marrow	IGLL1	0.6143	1
Bone marrow	CDADC1	0.6144	0
Bone marrow	OTULINL	0.6165	0
Bone marrow	PDIK1L	0.6165	0
Bone marrow	SLC9A8	0.6167	0
Bone marrow	DDIT3	0.6179	0
Bone marrow	CEP95	0.6179	0
Bone marrow	GNA13	0.6183	0
Bone marrow	USP24	0.6183	0
Bone marrow	CENPC	0.6185	0
Bone marrow	KLF4	0.6199	0
Bone marrow	IER3	0.6201	0
Bone marrow	BNIP1	0.6212	0
Bone marrow	FRAT2	0.6213	0
Bone marrow	BID	0.6218	0
Bone marrow	ZBTB34	0.6218	0
Bone marrow	RBBP6	0.6221	0
Bone marrow	CDK11A	0.6226	0
Bone marrow	TKT	0.623	0
Bone marrow	ZNF587B	0.623	0
Bone marrow	MIR22HG	0.6231	0
Bone marrow	CUL5	0.6237	0
Bone marrow	MRPS31P5	0.624	0
Bone marrow	ZNF292	0.6244	0
Bone marrow	GUSBP11	0.6245	0
Bone marrow	C18orf21	0.6258	0
Bone marrow	NOL9	0.6259	0
Bone marrow	OSGIN2	0.6261	0
Bone marrow	CDK6	0.6263	0
Bone marrow	FASTKD5	0.6263	0
Bone marrow	RCE1	0.6267	0
Bone marrow	MIIP	0.6273	0
Bone marrow	NFKBID	0.6276	0
Bone marrow	GPATCH2L	0.6281	0
Bone marrow	VPS13B	0.629	0
Bone marrow	FAM160B1	0.6295	0
Bone marrow	PAXBP1	0.6319	0
Bone marrow	PGD	0.6324	0
Bone marrow	CGAS	0.6326	0
Bone marrow	BACH1	0.6328	0
Bone marrow	CCL28	0.6333	0
Bone marrow	BCL2L11	0.6335	0
Bone marrow	SPTLC2	0.6336	0
Bone marrow	ZNF787	0.6339	0
Bone marrow	DNAJC2	0.6348	0
Bone marrow	CCNL1	0.636	0
Bone marrow	SDE2	0.6363	0
Bone marrow	TRAF6	0.6367	0
Bone marrow	TWISTNB	0.637	0
Bone marrow	DMXL2	0.6378	0
Bone marrow	TRAF3IP2	0.638	0
Bone marrow	OTUD1	0.6383	0
Bone marrow	KMT2D	0.6398	0
Bone marrow	IRF2BP2	0.64	0
Bone marrow	RIT1	0.6403	0
Bone marrow	MED30	0.6419	0
Bone marrow	MPP1	0.6428	0
Bone marrow	MED13L	0.6432	0
Bone marrow	ROCK1	0.6439	0
Bone marrow	HNRNPA1L2	0.644	1
Bone marrow	AEN	0.6457	0
Bone marrow	IER2	0.6466	0
Bone marrow	RSBN1	0.647	0
Bone marrow	B3GNT5	0.6474	0
Bone marrow	SLC25A37	0.6477	0
Bone marrow	RGS2	0.648	0
Bone marrow	RILPL2	0.6482	0
Bone marrow	CCDC59	0.6484	0
Bone marrow	IMPDH1P10	0.6485	0
Bone marrow	ZXDC	0.6486	0
Bone marrow	STX11	0.6488	0
Bone marrow	IFRD1	0.6494	0
Bone marrow	ZNF738	0.6516	0
Bone marrow	ING3	0.6517	0
Bone marrow	DDX28	0.6519	0
Bone marrow	MAP2K3	0.652	0
Bone marrow	WDFY1	0.652	0
Bone marrow	CCNT1	0.6522	0
Bone marrow	SAMSN1	0.653	1
Bone marrow	GZF1	0.6535	0
Bone marrow	KIF22	0.6536	0
Bone marrow	BAZ1A	0.6537	0
Bone marrow	PIM3	0.6538	0
Bone marrow	DPY19L1P1	0.6539	0
Bone marrow	HLX	0.654	0
Bone marrow	FAM214B	0.655	0
Bone marrow	WASH6P	0.6561	0
Bone marrow	RICTOR	0.6565	0
Bone marrow	EXO1	0.6565	0
Bone marrow	SSH2	0.6568	0
Bone marrow	SMPD4	0.6577	0
Bone marrow	ZNF335	0.6577	0
Bone marrow	KLF2	0.659	0
Bone marrow	IRAK1	0.6608	0
Bone marrow	ANKRD13D	0.6609	0
Bone marrow	IKZF5	0.6611	0
Bone marrow	ZNF121	0.6615	0
Bone marrow	B3GNT2	0.6616	0
Bone marrow	IRS2	0.6619	0
Bone marrow	TP53BP2	0.6625	0
Bone marrow	ZNF136	0.6626	0
Bone marrow	ALYREF	0.6627	0
Bone marrow	ZNF451	0.663	0
Bone marrow	CKAP2L	0.663	0
Bone marrow	SREK1	0.6632	0
Bone marrow	HJURP	0.6633	0
Bone marrow	PMAIP1	0.6634	0
Bone marrow	DENND4A	0.6636	0
Bone marrow	LINC01578	0.6638	0
Bone marrow	JMJD1C	0.6642	0
Bone marrow	TTC32	0.6644	0
Bone marrow	PLBD1	0.6645	0
Bone marrow	RSRC2	0.6648	0
Bone marrow	SREK1IP1	0.6648	0
Bone marrow	JOSD1	0.6672	0
Bone marrow	USP15	0.6672	0
Bone marrow	PLB1	0.6677	0
Bone marrow	EIF4EBP1	0.6683	0
Bone marrow	ZNF700	0.6696	0
Bone marrow	CCNE2	0.6698	0
Bone marrow	C3orf38	0.6703	0
Bone marrow	SCO2	0.6716	0
Bone marrow	RP2	0.6717	0
Bone marrow	CCNJ	0.6717	0
Bone marrow	DAGLB	0.6733	0
Bone marrow	MAPK1IP1L	0.6737	0
Bone marrow	ASB7	0.6738	0
Bone marrow	RBM33	0.674	0
Bone marrow	KANSL2	0.6744	0
Bone marrow	ATG16L1	0.6746	0
Bone marrow	LRRC75A	0.6746	0
Bone marrow	E2F1	0.6747	0
Bone marrow	DENND1A	0.6749	0
Bone marrow	ULK1	0.6751	0
Bone marrow	YPEL5	0.6759	0
Bone marrow	TENT4A	0.6765	0
Bone marrow	COX19	0.6766	0
Bone marrow	CLK1	0.6767	0
Bone marrow	ING5	0.6771	0
Bone marrow	NUP54	0.6773	0
Bone marrow	ORC1	0.6775	0
Bone marrow	HMGXB4	0.6776	0
Bone marrow	C11orf21	0.6783	0
Bone marrow	MLLT3	0.6784	0
Bone marrow	CLK3	0.6787	0
Bone marrow	TMCO3	0.6794	0
Bone marrow	NOM1	0.6799	0
Bone marrow	PER1	0.6801	0
Bone marrow	ELF4	0.6809	0
Bone marrow	NUDT1	0.682	0
Bone marrow	COG3	0.6826	0
Bone marrow	ZSCAN25	0.6835	0
Bone marrow	RUNX1	0.6839	0
Bone marrow	UROD	0.684	0
Bone marrow	ZBTB43	0.6843	0
Bone marrow	PIP4P1	0.6848	0
Bone marrow	CEP192	0.6853	0
Bone marrow	SLC2A1	0.6854	0
Bone marrow	GTF2B	0.6854	0
Bone marrow	SLC4A1	0.6857	0
Bone marrow	DNTTIP2	0.6858	0
Bone marrow	CCDC14	0.6858	0
Bone marrow	TRMT6	0.6863	0
Bone marrow	RINT1	0.6868	0
Bone marrow	IRAK3	0.6869	0
Bone marrow	PRC1	0.6874	0
Bone marrow	ZCCHC8	0.6875	0
Bone marrow	ERMAP	0.6881	0
Bone marrow	NSUN5	0.6886	0
Bone marrow	FOXO3	0.6902	0
Bone marrow	CCZ1	0.6904	0
Bone marrow	NIPBL	0.6907	0
Bone marrow	ASB6	0.6912	0
Bone marrow	CORO7	0.6913	0
Bone marrow	VASP	0.6915	0
Bone marrow	ANKRD18A	0.6915	0
Bone marrow	GTPBP4	0.6917	0
Bone marrow	ZNF317	0.692	0
Bone marrow	NR1H2	0.692	0
Bone marrow	YJU2	0.6922	0
Bone marrow	NCAPH2	0.6934	0
Bone marrow	MEF2D	0.6934	0
Bone marrow	ATAD5	0.6937	0
Bone marrow	PTAR1	0.6937	0
Bone marrow	B3GNTL1	0.6938	0
Bone marrow	GPATCH3	0.6939	0
Bone marrow	POLE3	0.694	0
Bone marrow	KBTBD2	0.6941	0
Bone marrow	C20orf27	0.6942	0
Bone marrow	CBLL1	0.6945	0
Bone marrow	MIDN	0.6947	0
Bone marrow	TGFBRAP1	0.6948	0
Bone marrow	CHD2	0.6949	0
Bone marrow	NCBP2-AS2	0.6964	0
Bone marrow	FRYL	0.6982	0
Bone marrow	NFAM1	0.6982	0
Bone marrow	ZC3HAV1	0.6987	0
Bone marrow	EPC2	0.6995	0
Bone marrow	AMPD3	0.7001	0
Bone marrow	DDX12P	0.7004	0
Bone marrow	THOC1	0.7007	0
Bone marrow	SIRT6	0.7011	0
Bone marrow	DUSP12	0.7015	0
Bone marrow	DHX8	0.7025	0
Bone marrow	COPS3	0.7027	0
Bone marrow	PYROXD1	0.7028	0
Bone marrow	CCNT2	0.7029	0
Bone marrow	PTCD1	0.7029	0
Bone marrow	ELF2	0.7029	0
Bone marrow	GPR35	0.7033	0
Bone marrow	ZNF211	0.7039	0
Bone marrow	ARRB2	0.7039	0
Bone marrow	DYRK1A	0.7047	0
Bone marrow	RALGDS	0.7048	0
Bone marrow	KRR1	0.7049	0
Bone marrow	TLR2	0.7053	0
Bone marrow	PTAFR	0.706	0
Bone marrow	CLEC7A	0.7061	0
Bone marrow	RMC1	0.7065	0
Bone marrow	NFKBIA	0.7068	0
Bone marrow	PNPLA8	0.7069	0
Bone marrow	CRTC2	0.7071	0
Bone marrow	ZBTB5	0.7076	0
Bone marrow	SPC24	0.7077	0
Bone marrow	MAN2A2	0.7082	0
Bone marrow	NRAS	0.7082	0
Bone marrow	UBR1	0.7085	0
Bone marrow	CSF3R	0.7087	0
Bone marrow	LYZ	0.709	0
Bone marrow	EAF1	0.7094	0
Bone marrow	NXF1	0.7095	0
Bone marrow	SNIP1	0.7096	0
Bone marrow	CHD9	0.7097	0
Bone marrow	FBXO7	0.7108	0
Bone marrow	NAALADL1	0.7123	0
Bone marrow	TYK2	0.7126	0
Bone marrow	NUP153	0.7128	0
Bone marrow	FBXO28	0.7128	0
Bone marrow	AXIN1	0.714	0
Bone marrow	NUCB2	0.7141	0
Bone marrow	PIK3R5	0.7141	0
Bone marrow	AHCTF1	0.7144	0
Bone marrow	RNMT	0.7145	0
Bone marrow	TMEM183A	0.7145	0
Bone marrow	AP1G1	0.7145	0
Bone marrow	PSMG3	0.7146	0
Bone marrow	AKIRIN2	0.7148	0
Bone marrow	LILRA5	0.7151	0
Bone marrow	ESS2	0.7169	0
Bone marrow	LSG1	0.7172	0
Bone marrow	PRR14	0.7172	0
Bone marrow	MGAT4A	0.7176	0
Bone marrow	WDR55	0.7192	0
Bone marrow	SAP30BP	0.7193	0
Bone marrow	RELA	0.7206	0
Bone marrow	VCPIP1	0.7207	0
Bone marrow	USP36	0.7217	0
Bone marrow	SUCO	0.7227	0
Bone marrow	SBNO2	0.7229	0
Bone marrow	DPPA4	0.723	1
Bone marrow	EIF1AD	0.7232	0
Bone marrow	MLXIP	0.7239	0
Bone marrow	CHD8	0.7243	0
Bone marrow	KMT2C	0.7244	0
Bone marrow	AP3S1	0.7248	0
Bone marrow	KMT2E	0.7253	0
Bone marrow	ETF1	0.7259	0
Bone marrow	ALOX5AP	0.7269	0
Bone marrow	ISY1	0.7269	0
Bone marrow	CDK12	0.7283	0
Bone marrow	ETV3	0.7285	0
Bone marrow	RNF24	0.7289	0
Bone marrow	JARID2	0.7292	0
Bone marrow	DENND3	0.7293	0
Bone marrow	KDM2A	0.7295	0
Bone marrow	HAUS3	0.7303	0
Bone marrow	SCARNA9	0.7304	0
Bone marrow	ZBTB11	0.7305	0
Bone marrow	ZC3H18	0.7306	0
Bone marrow	FAR1	0.7308	0
Bone marrow	RANBP2	0.7311	0
Bone marrow	STAM	0.7321	0
Bone marrow	BNIP2	0.7321	0
Bone marrow	NAF1	0.7323	0
Bone marrow	MFSD14A	0.7325	0
Bone marrow	SLC38A5	0.7326	0
Bone marrow	FOXN3	0.7326	0
Bone marrow	CTU2	0.7326	0
Bone marrow	RIOK3	0.7327	0
Bone marrow	RNASEH2C	0.7327	0
Bone marrow	MCPH1	0.7328	0
Bone marrow	TFIP11	0.733	0
Bone marrow	SPN	0.7336	0
Bone marrow	STXBP2	0.7342	0
Bone marrow	PCGF5	0.7342	0
Bone marrow	REST	0.7346	0
Bone marrow	DCAF16	0.7346	0
Bone marrow	CHFR	0.7347	0
Bone marrow	CPSF6	0.7347	0
Bone marrow	GPCPD1	0.7347	0
Bone marrow	CABIN1	0.7348	0
Bone marrow	TALDO1	0.7348	0
Bone marrow	DHRS13	0.735	0
Bone marrow	RASGRP4	0.7352	1
Bone marrow	ARMH1	0.7353	0
Bone marrow	WDR43	0.7363	0
Bone marrow	WDR74	0.7364	0
Bone marrow	PLEK	0.7366	1
Bone marrow	TBC1D23	0.7367	0
Bone marrow	TOPORS	0.737	0
Bone marrow	CHSY1	0.7375	0
Bone marrow	ATP6V0B	0.7378	0
Bone marrow	TROVE2	0.738	0
Bone marrow	MKRN1	0.7381	0
Bone marrow	TROAP	0.7384	0
Bone marrow	MYLIP	0.7385	0
Bone marrow	CCDC9	0.7386	0
Bone marrow	CHUK	0.7397	0
Bone marrow	DDX49	0.7405	0
Bone marrow	GYPC	0.741	0
Bone marrow	CD83	0.7412	0
Bone marrow	PPRC1	0.7418	0
Bone marrow	JMY	0.7418	0
Bone marrow	TRA2A	0.7421	0
Bone marrow	SVIP	0.7425	0
Bone marrow	FMNL1	0.7426	0
Bone marrow	SPI1	0.7427	0
Bone marrow	NUTM2A-AS1	0.743	0
Bone marrow	ZNF326	0.7431	0
Bone marrow	ADAM8	0.7432	1
Bone marrow	KLF13	0.7435	0
Bone marrow	NKG7	0.7444	0
Bone marrow	SMNDC1	0.7448	0
Bone marrow	NINJ1	0.7452	0
Bone marrow	THAP9-AS1	0.7452	0
Bone marrow	IMPDH1	0.7453	0
Bone marrow	PRRC2C	0.7453	0
Bone marrow	YIF1B	0.7455	0
Bone marrow	PHF20L1	0.7457	0
Bone marrow	PPM1A	0.7461	0
Bone marrow	FANCD2	0.7462	0
Bone marrow	TIMM29	0.7468	0
Bone marrow	TESC	0.7469	0
Bone marrow	IRGQ	0.747	0
Bone marrow	ZNF639	0.7472	0
Bone marrow	PRPF3	0.7481	0
Bone marrow	CNOT8	0.7487	0
Bone marrow	ABHD16A	0.7488	0
Bone marrow	PRPF18	0.7489	0
Bone marrow	ZFAND5	0.7492	0
Bone marrow	PI4K2A	0.7492	0
Bone marrow	THUMPD2	0.7493	0
Bone marrow	RBM22	0.7497	0
Bone marrow	EXOC8	0.7499	0
Bone marrow	NEMF	0.7501	0
Bone marrow	RAB9A	0.7502	0
Bone marrow	BNIP3L	0.7506	0
Bone marrow	EDC4	0.7508	0
Bone marrow	PLEKHM1	0.7515	0
Bone marrow	CD58	0.7519	0
Bone marrow	PSMD12	0.752	0
Bone marrow	VIRMA	0.7522	0
Bone marrow	POM121	0.7526	0
Bone marrow	MORC3	0.7529	0
Bone marrow	EIF4A3	0.7535	0
Bone marrow	DHX9	0.7536	0
Bone marrow	CXorf40B	0.754	0
Bone marrow	TAF5L	0.7545	0
Bone marrow	BLOC1S2	0.7545	0
Bone marrow	PLEKHM2	0.7546	0
Bone marrow	PHIP	0.7546	0
Bone marrow	TMEM189	0.7548	0
Bone marrow	ARF6	0.7549	0
Bone marrow	CENPW	0.7552	0
Bone marrow	MAP2K7	0.7554	0
Bone marrow	XAB2	0.7558	0
Bone marrow	TAZ	0.756	0
Bone marrow	EAPP	0.7573	0
Bone marrow	HGS	0.7574	0
Bone marrow	ZC3H15	0.7575	0
Bone marrow	MMGT1	0.7579	0
Bone marrow	YRDC	0.7579	0
Bone marrow	VPS18	0.7582	1
Bone marrow	PLAA	0.7582	0
Bone marrow	MARK3	0.7584	0
Bone marrow	CLEC2B	0.7586	1
Bone marrow	USP39	0.7586	0
Bone marrow	ZDHHC7	0.7591	0
Bone marrow	ZNF687	0.7595	0
Bone marrow	PSPC1	0.7599	0
Bone marrow	PXN	0.76	0
Bone marrow	MAPRE1	0.7601	0
Bone marrow	MTRF1L	0.7602	0
Bone marrow	ARPC5L	0.7603	0
Bone marrow	TAGAP	0.7603	0
Bone marrow	SART1	0.7606	0
Bone marrow	USB1	0.7609	0
Bone marrow	C16orf54	0.7609	0
Bone marrow	AKAP8L	0.761	0
Bone marrow	RN7SKP176	0.761	0
Bone marrow	PSMD9	0.7615	0
Bone marrow	ZDHHC12	0.7615	0
Bone marrow	CDK5RAP2	0.7617	0
Bone marrow	TMEM11	0.7617	0
Bone marrow	DNAJC9	0.7619	0
Bone marrow	ECD	0.762	0
Bone marrow	OXSR1	0.7621	0
Bone marrow	RC3H2	0.7622	0
Bone marrow	CDC40	0.7622	0
Bone marrow	ZNF586	0.7624	0
Bone marrow	EIF3B	0.7624	0
Bone marrow	PLAGL2	0.7624	0
Bone marrow	TOP3A	0.7624	0
Bone marrow	DDX11	0.7626	0
Bone marrow	ZNF410	0.7627	0
Bone marrow	ASCC2	0.7628	0
Bone marrow	GMEB2	0.763	0
Bone marrow	GET4	0.7635	0
Bone marrow	RASSF1	0.7639	0
Bone marrow	CLASRP	0.7639	0
Bone marrow	GOLT1B	0.7643	0
Bone marrow	FBXL12	0.7644	0
Bone marrow	NBEAL2	0.7652	0
Bone marrow	DBR1	0.7658	0
Bone marrow	DDX41	0.766	0
Bone marrow	MED10	0.7662	0
Bone marrow	MKNK2	0.7667	0
Bone marrow	BTG2	0.7667	0
Bone marrow	H3F3B	0.7672	0
Bone marrow	LATS1	0.7675	0
Bone marrow	ICAM3	0.7678	1
Bone marrow	RPIA	0.7679	0
Bone marrow	RBM34	0.7681	1
Bone marrow	SYF2	0.7687	0
Bone marrow	CNIH4	0.7688	0
Bone marrow	ADIPOR1	0.7688	0
Bone marrow	HPS1	0.7689	0
Bone marrow	CCNDBP1	0.769	0
Bone marrow	TBC1D15	0.7692	0
Bone marrow	RANBP6	0.7693	0
Bone marrow	RFWD3	0.7699	0
Bone marrow	TRMO	0.77	0
Bone marrow	BRMS1	0.7702	0
Bone marrow	NCF4	0.7704	1
Bone marrow	AKAP17A	0.7706	0
Bone marrow	SFSWAP	0.7709	0
Bone marrow	CKAP2	0.7712	0
Bone marrow	FRG1	0.7714	1
Bone marrow	SLC15A4	0.7714	0
Bone marrow	RPS6KB1	0.7716	0
Bone marrow	NARF	0.7719	0
Bone marrow	SLC25A28	0.772	0
Bone marrow	RAB32	0.7721	0
Bone marrow	HCFC1	0.7721	0
Bone marrow	FAM91A1	0.7725	0
Bone marrow	EP300	0.7726	0
Bone marrow	SPEN	0.7727	0
Bone marrow	TMEM62	0.7731	0
Bone marrow	MAFG	0.7734	0
Bone marrow	SLC25A39	0.7736	0
Bone marrow	SUV39H1	0.774	0
Bone marrow	UTP15	0.7742	0
Bone marrow	RNF166	0.7745	0
Bone marrow	CSNK1D	0.7747	0
Bone marrow	ADORA2A	0.7751	0
Bone marrow	MCU	0.7751	0
Bone marrow	ABHD13	0.7757	0
Bone marrow	RUNX2	0.7759	0
Bone marrow	CASP8	0.7761	0
Bone marrow	CARD9	0.7761	0
Bone marrow	EAF1-AS1	0.7764	0
Bone marrow	HSPA5	0.7765	0
Bone marrow	FECH	0.7767	0
Bone marrow	VPS11	0.7769	0
Bone marrow	CNOT2	0.7773	0
Bone marrow	UPRT	0.7776	0
Bone marrow	EMP3	0.7776	0
Bone marrow	PLK4	0.7779	0
Bone marrow	LLPH	0.778	0
Bone marrow	TPD52L2	0.7784	0
Bone marrow	INO80	0.7786	0
Bone marrow	CLN6	0.779	0
Bone marrow	DDX47	0.779	0
Bone marrow	FBXO5	0.7792	0
Bone marrow	VEZF1	0.7794	0
Bone marrow	METTL16	0.7795	0
Bone marrow	HERC1	0.7796	0
Bone marrow	CHD6	0.7797	0
Bone marrow	CXorf21	0.7801	0
Bone marrow	EMB	0.7802	1
Bone marrow	SIRT7	0.7808	0
Bone marrow	INPP5K	0.7809	0
Bone marrow	BCLAF1	0.781	0
Bone marrow	ZBED4	0.7812	0
Bone marrow	PLAC8	0.7814	0
Bone marrow	SUPT6H	0.7817	0
Bone marrow	RNF10	0.7822	0
Bone marrow	TNIP2	0.7822	0
Bone marrow	LAIR1	0.7827	0
Bone marrow	EXOSC10	0.7836	0
Bone marrow	AKAP8	0.784	0
Bone marrow	SNRNP200	0.784	0
Bone marrow	ZNF367	0.784	0
Bone marrow	RHOG	0.7842	0
Bone marrow	KIF23	0.7848	0
Bone marrow	SPATA21	0.7849	0
Bone marrow	DOK3	0.7852	0
Bone marrow	EIF2AK3	0.7852	0
Bone marrow	COPS2	0.7855	0
Bone marrow	CCDC174	0.7858	0
Bone marrow	IFT20	0.786	0
Bone marrow	CYBA	0.7862	0
Bone marrow	SF3B5	0.7862	0
Bone marrow	SMG1	0.7863	0
Bone marrow	SF3B6	0.7864	0
Bone marrow	CHMP4B	0.7866	0
Bone marrow	POLE	0.7871	0
Bone marrow	COMMD9	0.7875	0
Bone marrow	FAM133B	0.7884	0
Bone marrow	SNW1	0.7886	0
Bone marrow	HIPK1	0.7889	0
Bone marrow	NADSYN1	0.7889	0
Bone marrow	NGDN	0.789	0
Bone marrow	HCAR3	0.7894	0
Bone marrow	STX10	0.7897	0
Bone marrow	PDCD4	0.7897	0
Bone marrow	ANAPC15	0.7898	0
Bone marrow	LUC7L2	0.7901	0
Bone marrow	CRNKL1	0.7907	0
Bone marrow	DHX37	0.7908	0
Bone marrow	DCP2	0.7908	0
Bone marrow	UNC13D	0.7913	0
Bone marrow	DHX38	0.7917	0
Bone marrow	ABCF3	0.7918	0
Bone marrow	GNAI3	0.7919	0
Bone marrow	CACUL1	0.7919	0
Bone marrow	CHPF2	0.7922	0
Bone marrow	MECP2	0.7923	0
Bone marrow	MAX	0.7927	0
Bone marrow	SRSF11	0.7929	0
Bone marrow	MARCH6	0.7929	0
Bone marrow	CXorf56	0.794	0
Bone marrow	DDX39A	0.795	0
Bone marrow	GRK2	0.7955	0
Bone marrow	MAD2L1BP	0.7959	0
Bone marrow	E2F3	0.7965	0
Bone marrow	ANXA1	0.7973	0
Bone marrow	LILRA2	0.7977	0
Bone marrow	PSMD7	0.7978	0
Bone marrow	SLC25A36	0.7998	0
Bone marrow	YTHDC1	0.7999	0
Bone marrow	PRPF40A	0.8	0
Bone marrow	MALAT1	0.8	0
Bone marrow	NUP50	0.8001	0
Bone marrow	DNTTIP1	0.8001	0
Bone marrow	RAB35	0.801	0
Bone marrow	CRKL	0.8023	0
Bone marrow	SF1	0.8023	0
Bone marrow	RABGGTB	0.8025	0
Bone marrow	CYLD	0.8028	0
Bone marrow	ARAF	0.803	0
Bone marrow	SLC10A3	0.8031	0
Bone marrow	ZNF395	0.8035	0
Bone marrow	THEMIS2	0.8039	0
Bone marrow	BCL10	0.8044	0
Bone marrow	GMEB1	0.8051	0
Bone marrow	EMD	0.8055	0
Bone marrow	PIGC	0.8056	0
Bone marrow	TNNI2	0.8058	0
Bone marrow	IVNS1ABP	0.8059	0
Bone marrow	DAZAP2	0.8059	0
Bone marrow	UBAP1	0.8064	0
Bone marrow	TOR1AIP1	0.8066	0
Bone marrow	TAPT1	0.8066	0
Bone marrow	PRIM1	0.8067	0
Bone marrow	TRA2B	0.8068	0
Bone marrow	WDR26	0.8069	0
Bone marrow	HNRNPH1	0.807	0
Bone marrow	FERMT3	0.8071	1
Bone marrow	RNF103	0.8071	0
Bone marrow	UFD1	0.8073	0
Bone marrow	KNTC1	0.8074	0
Bone marrow	NDUFAF5	0.8078	0
Bone marrow	PARP8	0.8081	0
Bone marrow	MAPK14	0.8082	0
Bone marrow	H3F3A	0.8085	0
Bone marrow	AUP1	0.809	0
Bone marrow	WTAP	0.8092	0
Bone marrow	CDC42	0.8096	0
Bone marrow	YTHDF1	0.8096	0
Bone marrow	TTF2	0.8099	0
Bone marrow	PPP6C	0.8099	0
Bone marrow	TENT2	0.8101	0
Bone marrow	ZNF26	0.8102	0
Bone marrow	DDX3X	0.8102	0
Bone marrow	IST1	0.8104	0
Bone marrow	PSMD6	0.8108	0
Bone marrow	HAUS4	0.8111	0
Bone marrow	RSL24D1	0.8114	1
Bone marrow	SUPV3L1	0.8122	0
Bone marrow	HMGB2	0.8132	0
Bone marrow	BUD31	0.8133	0
Bone marrow	ATG3	0.8133	0
Bone marrow	GNL2	0.8144	0
Bone marrow	TPRKB	0.8149	0
Bone marrow	LDB1	0.8156	0
Bone marrow	ERO1A	0.816	0
Bone marrow	RAB2B	0.8163	0
Bone marrow	TOP1MT	0.8165	0
Bone marrow	FGFR1OP2	0.8166	0
Bone marrow	KLHL15	0.8167	0
Bone marrow	CIDECP	0.8171	0
Bone marrow	ZNF3	0.8174	0
Bone marrow	UBE2D3	0.8175	0
Bone marrow	H2AFY	0.8176	0
Bone marrow	CASP2	0.818	0
Bone marrow	VRK1	0.8181	1
Bone marrow	BTF3L4	0.8183	0
Bone marrow	ZFPL1	0.8194	0
Bone marrow	PGS1	0.8195	0
Bone marrow	PRPF8	0.8196	0
Bone marrow	SHCBP1	0.8198	0
Bone marrow	SRA1	0.8198	0
Bone marrow	RIOK1	0.8201	0
Bone marrow	MED23	0.8204	0
Bone marrow	G0S2	0.8205	0
Bone marrow	SF3B4	0.8205	0
Bone marrow	PSTK	0.8207	0
Bone marrow	WBP11	0.8209	0
Bone marrow	NUP85	0.8215	0
Bone marrow	HNRNPU	0.8217	0
Bone marrow	RBM39	0.8218	0
Bone marrow	ADNP2	0.8231	0
Bone marrow	ZNF384	0.8233	0
Bone marrow	SRSF10	0.8234	0
Bone marrow	ACIN1	0.8235	0
Bone marrow	NOP2	0.8237	0
Bone marrow	SUSD6	0.8238	0
Bone marrow	MED6	0.8239	0
Bone marrow	R3HDM4	0.8239	0
Bone marrow	TYROBP	0.824	0
Bone marrow	ANKHD1	0.824	0
Bone marrow	CIR1	0.8242	0
Bone marrow	STK26	0.8245	0
Bone marrow	ILKAP	0.8249	0
Bone marrow	SLC20A1	0.8251	0
Bone marrow	SRSF6	0.8255	0
Bone marrow	EFHD2	0.8255	0
Bone marrow	BRPF1	0.8263	0
Bone marrow	RPLP1	0.8264	0
Bone marrow	MINDY3	0.8267	0
Bone marrow	DHX15	0.8268	0
Bone marrow	EMC8	0.827	0
Bone marrow	PSMG2	0.8271	0
Bone marrow	STMP1	0.8276	0
Bone marrow	POLDIP3	0.8279	0
Bone marrow	TRAPPC10	0.8282	0
Bone marrow	SCFD1	0.8287	0
Bone marrow	DDX21	0.8289	0
Bone marrow	E2F4	0.829	0
Bone marrow	EZH2	0.8291	0
Bone marrow	PPP4R3A	0.8292	0
Bone marrow	SFPQ	0.8293	0
Bone marrow	PNP	0.8293	0
Bone marrow	LST1	0.8298	0
Bone marrow	SH3GL1	0.8301	0
Bone marrow	SFT2D2	0.8301	0
Bone marrow	SRSF4	0.8304	0
Bone marrow	PTP4A2	0.8308	0
Bone marrow	EHD1	0.8317	0
Bone marrow	ZUP1	0.8317	0
Bone marrow	MAP1LC3B	0.832	0
Bone marrow	OAZ1	0.8323	0
Bone marrow	PHF5A	0.8325	0
Bone marrow	CHMP1B-AS1	0.8325	0
Bone marrow	MFSD5	0.8326	0
Bone marrow	FBXO9	0.8332	0
Bone marrow	MAPKAPK5	0.8333	0
Bone marrow	HSPA14	0.8338	0
Bone marrow	ABCF1	0.8338	0
Bone marrow	AIMP1	0.834	0
Bone marrow	CHD4	0.8346	0
Bone marrow	RFC5	0.8347	0
Bone marrow	USP4	0.8347	0
Bone marrow	U2AF1	0.8348	0
Bone marrow	IRF1	0.8351	0
Bone marrow	ATF4	0.8353	0
Bone marrow	RLIM	0.8354	0
Bone marrow	LSM14A	0.8358	0
Bone marrow	FAM76B	0.836	0
Bone marrow	NFKB1	0.8364	0
Bone marrow	FAM45A	0.8364	0
Bone marrow	LRRC75A-AS1	0.8364	0
Bone marrow	STK10	0.8366	0
Bone marrow	QRICH1	0.8373	0
Bone marrow	ZEB2	0.8377	0
Bone marrow	COPE	0.8383	0
Bone marrow	RPL6P27	0.8383	0
Bone marrow	ILF3	0.8384	0
Bone marrow	MIGA2	0.8387	0
Bone marrow	SUPT4H1	0.8389	0
Bone marrow	RIN3	0.8392	1
Bone marrow	PPP1R15B	0.8393	0
Bone marrow	RAB5C	0.8397	0
Bone marrow	YTHDF2	0.8399	0
Bone marrow	PSTPIP1	0.8404	0
Bone marrow	UHRF2	0.8405	0
Bone marrow	ITGB2	0.8405	0
Bone marrow	KTI12	0.8405	0
Bone marrow	SUB1	0.8411	0
Bone marrow	BRD2	0.8412	0
Bone marrow	POLD1	0.8414	0
Bone marrow	XPNPEP1	0.8416	0
Bone marrow	ADPGK	0.8419	0
Bone marrow	TRIM25	0.8423	0
Bone marrow	SRSF5	0.8424	0
Bone marrow	KPNA2P3	0.8426	0
Bone marrow	EIF5A	0.8432	0
Bone marrow	HEXA	0.8434	0
Bone marrow	CCDC88B	0.8435	0
Bone marrow	RNPS1	0.8436	0
Bone marrow	TSN	0.8444	0
Bone marrow	SPCS3	0.8448	0
Bone marrow	NAMPT	0.845	0
Bone marrow	ING2	0.845	0
Bone marrow	MYD88	0.845	0
Bone marrow	MYO1G	0.8454	0
Bone marrow	COMMD5	0.8457	0
Bone marrow	LASP1	0.8466	0
Bone marrow	RPS6KB2	0.8468	0
Bone marrow	SSR4	0.8468	0
Bone marrow	SBDSP1	0.8471	0
Bone marrow	ARFGAP2	0.8472	0
Bone marrow	OTUD5	0.8474	0
Bone marrow	OGA	0.8477	0
Bone marrow	RNF139	0.8479	0
Bone marrow	KLF3	0.8484	0
Bone marrow	CHTOP	0.8484	0
Bone marrow	MARS	0.8484	0
Bone marrow	STAT5A	0.8488	0
Bone marrow	EIF1	0.8489	0
Bone marrow	ELL	0.849	0
Bone marrow	HNRNPH3	0.8491	0
Bone marrow	CWF19L1	0.8494	0
Bone marrow	RBM3	0.8494	0
Bone marrow	MANBA	0.8497	0
Bone marrow	SUN2	0.8499	0
Bone marrow	DNAJB6	0.8509	0
Bone marrow	SH2B3	0.8509	0
Bone marrow	C9orf78	0.8513	0
Bone marrow	SHKBP1	0.8513	0
Bone marrow	MPHOSPH9	0.8518	0
Bone marrow	SUMO3	0.8518	0
Bone marrow	GRK6	0.8519	0
Bone marrow	ANAPC5	0.852	0
Bone marrow	JADE1	0.8527	0
Bone marrow	TCP1	0.8529	0
Bone marrow	PIGH	0.853	0
Bone marrow	KDM3A	0.853	0
Bone marrow	FAM32A	0.8533	0
Bone marrow	DNMT1	0.8539	0
Bone marrow	NDST2	0.8543	0
Bone marrow	SLTM	0.8544	0
Bone marrow	ERI1	0.8548	0
Bone marrow	CXXC1	0.8557	0
Bone marrow	ORC6	0.8563	0
Bone marrow	ADGRE5	0.8563	0
Bone marrow	MED24	0.857	0
Bone marrow	PCLAF	0.857	0
Bone marrow	CHMP1A	0.8571	0
Bone marrow	UBXN1	0.8571	0
Bone marrow	LRRC70	0.8571	1
Bone marrow	SNHG3	0.8571	0
Bone marrow	SNRPB	0.8573	0
Bone marrow	MIS18BP1	0.858	0
Bone marrow	SSR2	0.8586	0
Bone marrow	RPS24	0.8589	0
Bone marrow	CWC15	0.8593	0
Bone marrow	LAMTOR3	0.8598	0
Bone marrow	CLIC1	0.8598	0
Bone marrow	UFM1	0.8605	0
Bone marrow	PI4KB	0.8606	0
Bone marrow	TNIP1	0.8614	0
Bone marrow	GID8	0.8617	0
Bone marrow	TREM1	0.862	0
Bone marrow	UBC	0.8623	0
Bone marrow	EIF4H	0.8626	0
Bone marrow	UBR4	0.8635	0
Bone marrow	BCL7B	0.8638	0
Bone marrow	ZNF655	0.8639	0
Bone marrow	U2SURP	0.8646	0
Bone marrow	LCP2	0.8651	0
Bone marrow	ZNF14	0.8651	0
Bone marrow	PPP4R2	0.8657	0
Bone marrow	PHF12	0.8664	0
Bone marrow	NRM	0.8664	0
Bone marrow	USP16	0.8665	0
Bone marrow	SCAF11	0.8666	0
Bone marrow	UFC1	0.8672	0
Bone marrow	UBE2D1	0.8676	0
Bone marrow	DDOST	0.8678	0
Bone marrow	SRSF3	0.8691	0
Bone marrow	BTG3	0.8693	0
Bone marrow	CDK9	0.8695	0
Bone marrow	SNF8	0.8695	0
Bone marrow	UBAP2L	0.8702	0
Bone marrow	CD44	0.8703	0
Bone marrow	ARHGDIA	0.8706	0
Bone marrow	PABPC4	0.8708	0
Bone marrow	SLC7A5	0.871	0
Bone marrow	FZR1	0.8716	0
Bone marrow	FGR	0.8718	0
Bone marrow	RTF2	0.8723	0
Bone marrow	TRABD	0.8724	0
Bone marrow	PTBP1	0.8728	0
Bone marrow	LTV1	0.8734	0
Bone marrow	SMN1	0.8735	0
Bone marrow	YTHDF3	0.8738	0
Bone marrow	SF3B2	0.8739	0
Bone marrow	HNRNPL	0.874	0
Bone marrow	RBM4	0.8742	0
Bone marrow	DKC1	0.8745	0
Bone marrow	BAP1	0.8749	0
Bone marrow	RAB5IF	0.8753	0
Bone marrow	GMFG	0.8753	0
Bone marrow	RPL29	0.8753	0
Bone marrow	RPS9	0.8759	1
Bone marrow	RBM25	0.876	0
Bone marrow	TPM3	0.876	0
Bone marrow	ERVK3-1	0.8765	0
Bone marrow	DNM2	0.8775	0
Bone marrow	RNF113A	0.8775	0
Bone marrow	MSL2	0.8779	0
Bone marrow	PABPN1	0.878	0
Bone marrow	TXNDC11	0.878	0
Bone marrow	EXOSC9	0.8782	0
Bone marrow	GTF3C5	0.8783	0
Bone marrow	FAU	0.8787	0
Bone marrow	DNAJB12	0.8789	0
Bone marrow	RBM7	0.8797	1
Bone marrow	SNRPA1	0.88	0
Bone marrow	C17orf49	0.8803	0
Bone marrow	HNRNPUL1	0.8809	0
Bone marrow	PLIN3	0.8809	0
Bone marrow	MYO1F	0.881	0
Bone marrow	EIF4A1	0.881	0
Bone marrow	NELFCD	0.8813	0
Bone marrow	ZNF207	0.8819	0
Bone marrow	YME1L1	0.8832	0
Bone marrow	LOXL3	0.884	0
Bone marrow	USP38	0.8843	0
Bone marrow	FAM53C	0.8853	0
Bone marrow	MTMR14	0.8866	0
Bone marrow	GARS	0.8868	0
Bone marrow	PSMD2	0.8869	0
Bone marrow	KDM4C	0.8872	0
Bone marrow	COQ10B	0.8872	0
Bone marrow	MRPL9	0.8872	0
Bone marrow	CTNNB1	0.8872	0
Bone marrow	YY1AP1	0.8881	0
Bone marrow	FXYD5	0.889	0
Bone marrow	DDX5	0.8893	0
Bone marrow	SNRPF	0.8894	0
Bone marrow	MCL1	0.8896	0
Bone marrow	PRPF4B	0.8899	0
Bone marrow	EIF4G2	0.8902	0
Bone marrow	NUP98	0.8908	0
Bone marrow	SRSF7	0.8922	0
Bone marrow	FBXL3	0.8928	0
Bone marrow	H2AFV	0.8929	0
Bone marrow	ZFAS1	0.8929	0
Bone marrow	HMGN2	0.8931	0
Bone marrow	LIG1	0.8937	0
Bone marrow	RPL35	0.8942	0
Bone marrow	CDK2	0.8943	0
Bone marrow	PFDN5	0.8954	0
Bone marrow	CNOT1	0.8955	0
Bone marrow	AGTRAP	0.8969	0
Bone marrow	BCOR	0.897	0
Bone marrow	MED15	0.8979	0
Bone marrow	NRBP1	0.8985	0
Bone marrow	TAF11	0.8997	0
Bone marrow	CD82	0.8998	0
Bone marrow	MRPL54	0.9001	0
Bone marrow	GNAI2	0.9002	0
Bone marrow	MAGOH	0.9004	0
Bone marrow	USF1	0.9006	0
Bone marrow	MCM7	0.9008	0
Bone marrow	PET100	0.9029	0
Bone marrow	YY1	0.9033	0
Bone marrow	SRSF2	0.9039	0
Bone marrow	NOP58	0.9042	0
Bone marrow	PTPN7	0.9043	0
Bone marrow	RAF1	0.9044	0
Bone marrow	MAPKAPK2	0.905	0
Bone marrow	MAD2L2	0.9057	0
Bone marrow	RALY	0.9061	0
Bone marrow	POLR1D	0.9062	0
Bone marrow	IP6K2	0.9063	0
Bone marrow	TBC1D22B	0.9074	0
Bone marrow	UXT	0.9074	0
Bone marrow	FLOT2	0.9077	0
Bone marrow	PCBP2	0.9083	0
Bone marrow	HDGF	0.9087	0
Bone marrow	TIAL1	0.9088	0
Bone marrow	UBA52	0.9088	0
Bone marrow	RPS21	0.9095	0
Bone marrow	C1D	0.9121	1
Bone marrow	UTP23	0.9124	0
Bone marrow	CDC37	0.9126	0
Bone marrow	CNPY3	0.9142	0
Bone marrow	HNRNPM	0.916	0
Bone marrow	RBM18	0.916	0
Bone marrow	RPLP0	0.9163	0
Bone marrow	TOM1	0.9169	0
Bone marrow	UBE2I	0.9173	0
Bone marrow	ZC3H11A	0.9188	0
Bone marrow	PNN	0.9206	0
Bone marrow	TCERG1	0.9208	0
Bone marrow	SAR1A	0.9213	0
Bone marrow	SNHG1	0.9213	0
Bone marrow	FTSJ1	0.922	0
Bone marrow	NONO	0.9249	0
Bone marrow	POLR3E	0.9257	0
Bone marrow	RFXANK	0.9259	0
Bone marrow	NOL11	0.9278	0
Bone marrow	RBM17	0.9287	0
Bone marrow	H2AFZ	0.9302	1
Bone marrow	ARHGDIB	0.9304	1
Bone marrow	CARS2	0.9327	0
Bone marrow	PPIH	0.933	0
Bone marrow	SF3B1	0.9337	0
Bone marrow	PCBP1	0.9349	0
Bone marrow	SSB	0.9353	1
Bone marrow	EWSR1	0.9364	0
Bone marrow	DDX27	0.937	0
Bone marrow	RPL39	0.9382	0
Bone marrow	SMARCD1	0.9383	0
Bone marrow	RPL27	0.9398	0
Bone marrow	MAN2B1	0.9399	1
Bone marrow	RPS3	0.9399	0
Bone marrow	HMGB1	0.9411	0
Bone marrow	PSMB4	0.9446	0
Bone marrow	RPS15A	0.9448	0
Bone marrow	RPL34	0.9449	0
Bone marrow	RPS10	0.9455	0
Bone marrow	NACA	0.9472	0
Bone marrow	VIM	0.9473	0
Bone marrow	RPS11	0.9515	0
Bone marrow	BLOC1S1	0.9519	0
Bone marrow	HNRNPA1	0.9561	0
Bone marrow	GSE1	0.9575	0
Bone marrow	U2AF2	0.958	0
Bone marrow	ARF1	0.9679	0
Bone marrow	GUSB	0.9704	0
Bone marrow	KAT8	0.9712	0
Bone marrow	PRKCSH	0.972	0
Brain	NTM-AS1	0	0
Brain	FEZF2	0.0003	1
Brain	LINC00320	0.0003	0
Brain	MIR124-2HG	0.0005	0
Brain	HTR5A-AS1	0.0022	0
Brain	NEUROD6	0.0026	1
Brain	NEUROD2	0.003	0
Brain	CACNG3	0.0036	1
Brain	OLIG2	0.0042	1
Brain	VSTM2B	0.0046	0
Brain	OPALIN	0.0049	1
Brain	SLITRK1	0.0053	1
Brain	NKX2-2	0.0059	0
Brain	CACNG2	0.0069	0
Brain	NKX2-2-AS1	0.0069	0
Brain	RIT2	0.0087	1
Brain	NRSN1	0.0092	1
Brain	FUT9	0.0097	0
Brain	GABRA1	0.0101	1
Brain	NR2E1	0.0109	0
Brain	RNF219-AS1	0.0114	0
Brain	SLC24A2	0.012	1
Brain	KCNV1	0.0121	1
Brain	LINC01476	0.0133	0
Brain	NXPH1	0.0136	1
Brain	TMEM235	0.0136	0
Brain	MARCH4	0.0145	0
Brain	VGF	0.0148	0
Brain	LINC00599	0.0158	0
Brain	STMN4	0.0159	1
Brain	TMEM196	0.0161	0
Brain	KCNA1	0.0165	0
Brain	TMEM151A	0.0171	0
Brain	LINC01102	0.0178	0
Brain	DCX	0.0185	0
Brain	C2orf80	0.0193	0
Brain	GPR37L1	0.02	1
Brain	SNCB	0.0216	0
Brain	GABRG1	0.0224	1
Brain	KCTD4	0.023	0
Brain	LINC02440	0.023	0
Brain	FOXG1-AS1	0.0232	0
Brain	LINC00507	0.0236	0
Brain	CREG2	0.024	1
Brain	LINC01105	0.0242	0
Brain	ATP2B3	0.0244	0
Brain	LHFPL4	0.0253	0
Brain	TTC9B	0.0255	1
Brain	TNR	0.0263	1
Brain	SLC7A14	0.0283	0
Brain	FABP7	0.0292	0
Brain	GRM3	0.0306	1
Brain	GAD2	0.0311	0
Brain	FNDC9	0.0318	0
Brain	GPR12	0.0347	0
Brain	LINC00461	0.0351	0
Brain	SRRM4	0.0366	0
Brain	OLFM3	0.0373	0
Brain	TMEM151B	0.0377	0
Brain	NKAIN3	0.0382	0
Brain	PCDH11X	0.0385	0
Brain	SEZ6	0.0386	0
Brain	HRH3	0.0396	0
Brain	KCNH1	0.0396	0
Brain	GABRA5	0.0396	1
Brain	GDAP1L1	0.0397	1
Brain	LRTM2	0.0397	0
Brain	SMIM18	0.0397	0
Brain	RLBP1	0.0402	0
Brain	ADGRA1	0.0417	0
Brain	KCNK12	0.0426	0
Brain	RGS20	0.0435	0
Brain	KCNJ9	0.0436	0
Brain	PCDHGC5	0.0439	0
Brain	PCDHGC4	0.0452	0
Brain	ZDHHC22	0.0458	1
Brain	GRIA4	0.0461	0
Brain	CNTNAP5	0.0464	0
Brain	GABRA3	0.0468	0
Brain	ASCL1	0.049	0
Brain	LINC00634	0.049	0
Brain	SOX1-OT	0.0491	0
Brain	SOX21-AS1	0.0491	0
Brain	DACH2	0.0496	0
Brain	LRRTM4	0.0497	0
Brain	MAGEE2	0.0497	0
Brain	CDH20	0.05	0
Brain	GLRA3	0.0502	0
Brain	CAMK2N2	0.0507	0
Brain	PAK5	0.051	1
Brain	KCNF1	0.0515	1
Brain	PTPRN	0.0517	0
Brain	UNC5A	0.052	0
Brain	CLEC2L	0.0528	0
Brain	SLC6A7	0.0529	0
Brain	GPR62	0.0541	0
Brain	LINC01007	0.0541	0
Brain	DSCAM	0.0546	0
Brain	SVOP	0.0554	1
Brain	SEZ6L	0.0559	0
Brain	RIPPLY2	0.0559	0
Brain	LRRTM2	0.0561	1
Brain	TMEM132D	0.0564	0
Brain	HTR2A	0.0571	0
Brain	EIF4E1B	0.0575	0
Brain	BCYRN1	0.0597	0
Brain	MAG	0.0599	1
Brain	KCNS2	0.0606	1
Brain	MIR4500HG	0.0607	0
Brain	PCSK1	0.0608	0
Brain	LINC01736	0.0609	0
Brain	GRM5-AS1	0.0614	0
Brain	CACNG7	0.0618	0
Brain	POU3F2	0.0626	1
Brain	NTSR2	0.0629	1
Brain	HS6ST3	0.0629	0
Brain	ATP10B	0.0634	0
Brain	ZCCHC12	0.0634	1
Brain	SLC6A15	0.0639	0
Brain	SLC39A12	0.0646	1
Brain	IL1RAPL1	0.0649	1
Brain	PIRT	0.0651	0
Brain	INHBA-AS1	0.066	0
Brain	SEPT3	0.067	0
Brain	SLC26A4-AS1	0.067	0
Brain	SYT4	0.0676	0
Brain	LINC00632	0.0685	0
Brain	FAM19A1	0.0688	1
Brain	CEND1	0.0688	1
Brain	LRP1B	0.0694	0
Brain	CSPG5	0.0698	1
Brain	GFAP	0.07	1
Brain	LINC01563	0.0708	0
Brain	AQP4-AS1	0.0719	0
Brain	SLC4A10	0.072	0
Brain	CBLN2	0.0725	1
Brain	NYAP2	0.0726	0
Brain	PTPRT	0.0732	0
Brain	ST18	0.0752	0
Brain	HTR1A	0.0752	0
Brain	TMEM155	0.0763	0
Brain	KRTAP5-AS1	0.0767	0
Brain	SCG2	0.0785	0
Brain	CACNG8	0.0797	0
Brain	ARPP21	0.0798	0
Brain	FAM131B	0.0819	1
Brain	TAC3	0.0836	0
Brain	STMN2	0.0845	1
Brain	GPR158	0.0845	0
Brain	TMEM59L	0.0849	1
Brain	SLC17A7	0.085	1
Brain	CLCA4	0.0858	0
Brain	RPH3A	0.0861	1
Brain	SST	0.0864	0
Brain	CLVS1	0.0877	0
Brain	NRG3	0.0883	1
Brain	BCAN	0.0888	1
Brain	OLIG1	0.0895	1
Brain	KCNH7	0.09	0
Brain	SLC32A1	0.0928	0
Brain	GABRG2	0.0934	0
Brain	GABRB1	0.0935	0
Brain	LRRTM1	0.0941	0
Brain	HRK	0.0946	0
Brain	C5orf64	0.0963	0
Brain	HCG22	0.0969	0
Brain	CDK5R2	0.0988	0
Brain	B3GALT1	0.1008	0
Brain	SHANK1	0.1017	0
Brain	ELAVL3	0.1019	1
Brain	GPRIN1	0.1025	0
Brain	PCDHGB1	0.1027	0
Brain	FXYD7	0.1036	1
Brain	OPCML	0.1045	1
Brain	SLC8A3	0.1048	0
Brain	LIX1	0.1056	0
Brain	CACNA1E	0.1058	0
Brain	KCNQ3	0.1062	0
Brain	FAM163B	0.1062	0
Brain	SNAP25-AS1	0.1071	0
Brain	PRR36	0.108	0
Brain	BAALC-AS2	0.1085	0
Brain	TTBK1	0.1092	0
Brain	CACNA1G	0.1099	0
Brain	TRIM9	0.11	0
Brain	KRTAP5-2	0.1105	0
Brain	SMIM17	0.1109	0
Brain	MCHR2	0.1111	0
Brain	XKR4	0.1122	0
Brain	TBR1	0.1128	1
Brain	ADCYAP1R1	0.1138	1
Brain	C2CD4C	0.1139	0
Brain	SOX21	0.1144	0
Brain	ERC2	0.1147	0
Brain	C1QL1	0.116	0
Brain	SLCO1C1	0.1168	1
Brain	CDH8	0.1169	0
Brain	APC2	0.1178	1
Brain	CADM2	0.1193	0
Brain	FAM171A2	0.1194	0
Brain	NPTX1	0.1201	1
Brain	SPRED3	0.1205	0
Brain	SLC35F3	0.1207	0
Brain	TMEM132B	0.121	0
Brain	GABRB2	0.1224	0
Brain	NETO1	0.1235	0
Brain	KCTD8	0.126	0
Brain	MEGF10	0.1261	1
Brain	GRIA2	0.1262	0
Brain	CBARP	0.1273	0
Brain	RFPL1S	0.1278	0
Brain	DISP2	0.1283	0
Brain	NIM1K	0.1287	0
Brain	PCDHA10	0.1293	0
Brain	ZMAT4	0.1298	0
Brain	XKR7	0.1306	0
Brain	SLC7A10	0.1307	0
Brain	KCNK2	0.1333	0
Brain	SLC12A5	0.1337	0
Brain	KSR2	0.1342	0
Brain	CDR1	0.1343	1
Brain	RUNDC3A	0.1348	1
Brain	SV2B	0.1367	0
Brain	CPLX2	0.1372	0
Brain	CPNE9	0.1375	0
Brain	ST8SIA3	0.1376	0
Brain	SYP	0.1378	0
Brain	AMER2	0.1385	1
Brain	LMTK3	0.1386	0
Brain	RAB3C	0.1386	0
Brain	P2RX6P	0.1396	0
Brain	EPHX4	0.1411	0
Brain	LINC01122	0.1427	0
Brain	LRRC4C	0.1431	0
Brain	C11orf87	0.1432	1
Brain	DIRAS2	0.1438	0
Brain	SYT1	0.144	0
Brain	CKMT1A	0.1454	0
Brain	CHRNB2	0.1457	0
Brain	RIMS2	0.1457	0
Brain	MEG8	0.1524	0
Brain	RIMBP2	0.1527	0
Brain	SYN2	0.153	1
Brain	FRMPD3	0.1536	0
Brain	DLEU7	0.154	0
Brain	FAM171B	0.1543	0
Brain	NNAT	0.1548	0
Brain	GRIK4	0.1551	0
Brain	SCN3B	0.1563	0
Brain	PTPN5	0.1575	1
Brain	KIRREL3	0.1589	0
Brain	BEND6	0.1589	0
Brain	SLC35F1	0.1592	0
Brain	GALNT13	0.1593	0
Brain	CCKBR	0.1596	0
Brain	CAMKV	0.1607	1
Brain	CDH22	0.1612	0
Brain	LY86-AS1	0.1616	0
Brain	CHST6	0.1632	0
Brain	ACTL6B	0.165	0
Brain	AMZ1	0.1651	0
Brain	C3orf80	0.1654	0
Brain	PSD2	0.1656	1
Brain	EFNB3	0.1658	0
Brain	NCAN	0.1658	1
Brain	ADGRB3	0.1672	1
Brain	B3GAT1	0.1673	0
Brain	KIF1A	0.1683	0
Brain	LRRC7	0.1686	0
Brain	GABBR2	0.169	1
Brain	PCDH8	0.1693	1
Brain	SYT13	0.1695	0
Brain	LRRC4B	0.1698	0
Brain	SLC7A11	0.1698	0
Brain	CSMD2	0.1713	0
Brain	BRINP1	0.1721	0
Brain	PTPRZ1	0.1721	1
Brain	MAP6D1	0.1735	1
Brain	PMP2	0.1738	1
Brain	ATP6V1G2	0.174	0
Brain	KCNB1	0.1747	0
Brain	FSTL5	0.175	0
Brain	ZNF365	0.1755	1
Brain	NPAS3	0.1793	0
Brain	ANO3	0.1795	0
Brain	AMER3	0.1798	0
Brain	SCG3	0.1803	0
Brain	KCNA6	0.183	0
Brain	FAM155A	0.1832	0
Brain	PNMA8B	0.1832	0
Brain	KCNK9	0.1848	0
Brain	TMPRSS5	0.1863	1
Brain	GRIK3	0.1877	0
Brain	FRRS1L	0.1877	0
Brain	KCNH3	0.1881	0
Brain	KLHL32	0.1906	1
Brain	RASL10A	0.1925	1
Brain	STX1B	0.1926	1
Brain	OR13E1P	0.1934	0
Brain	DCTN1-AS1	0.1941	0
Brain	DLL3	0.1952	0
Brain	ELFN2	0.1953	0
Brain	GPR173	0.197	0
Brain	JAKMIP2	0.1971	0
Brain	KIAA1549L	0.1981	0
Brain	KNDC1	0.1984	0
Brain	STUM	0.1987	1
Brain	TAGLN3	0.1992	0
Brain	GRM5	0.2005	1
Brain	PCDHA4	0.2016	0
Brain	PTPRD-AS1	0.2026	0
Brain	CMTM5	0.2048	1
Brain	ADARB2	0.2053	0
Brain	DNER	0.207	0
Brain	SLIT1	0.2075	1
Brain	LINC00672	0.208	0
Brain	DGKB	0.2082	0
Brain	CELF3	0.2087	0
Brain	AKAP5	0.2098	0
Brain	ADGRL3	0.2113	0
Brain	SLC6A17	0.2113	0
Brain	CNTNAP4	0.2118	1
Brain	MMP16	0.2128	0
Brain	HAPLN2	0.2132	1
Brain	GOLGA7B	0.2135	0
Brain	TPTE2P1	0.2148	0
Brain	NLGN1	0.2162	0
Brain	MTMR7	0.2164	0
Brain	TRIM46	0.2165	1
Brain	ATCAY	0.2165	1
Brain	SCN3A	0.2169	0
Brain	LINC00639	0.2174	0
Brain	GPR19	0.2186	0
Brain	NGB	0.2189	1
Brain	LINC01351	0.2192	0
Brain	LINC01094	0.2193	0
Brain	EPHA5	0.2202	0
Brain	NACAD	0.2213	0
Brain	PRMT8	0.2228	0
Brain	DNM1	0.2238	0
Brain	CNKSR2	0.2244	0
Brain	ZNF804A	0.2244	0
Brain	GJC2	0.2248	0
Brain	KCNH8	0.2254	0
Brain	SLC8A2	0.2291	0
Brain	ARHGEF26-AS1	0.2292	0
Brain	ASIC2	0.2293	0
Brain	MYH15	0.2311	0
Brain	CHST1	0.2324	0
Brain	RNFT2	0.233	0
Brain	SHISA7	0.2332	0
Brain	SOX8	0.2335	1
Brain	PCP4L1	0.2347	0
Brain	LINGO1	0.236	0
Brain	PDZD7	0.2363	0
Brain	CRHR1	0.238	0
Brain	PCDH19	0.2418	0
Brain	INA	0.2421	0
Brain	KCNN1	0.2428	1
Brain	SOX2	0.2438	0
Brain	KIF3C	0.2447	0
Brain	ZC3H12B	0.2463	0
Brain	GPR61	0.2466	0
Brain	GPR137C	0.2482	0
Brain	RNF112	0.2483	0
Brain	GRID1	0.2487	0
Brain	GPR75	0.2517	0
Brain	SNAP25	0.2517	1
Brain	FAM181B	0.2518	1
Brain	NKX6-2	0.2524	1
Brain	SLC24A5	0.2526	0
Brain	GLDN	0.2528	0
Brain	LRRC55	0.2531	0
Brain	DNAJC6	0.2545	0
Brain	RIMS3	0.2547	0
Brain	MGAT5B	0.2548	0
Brain	BAALC	0.2551	1
Brain	FOXO6	0.2571	0
Brain	PGM2L1	0.2588	0
Brain	GPM6A	0.26	1
Brain	VXN	0.2607	0
Brain	TMEM169	0.2609	0
Brain	LAMP5	0.2622	0
Brain	CPLX1	0.2623	0
Brain	FRMPD4	0.2623	0
Brain	PCDHGA10	0.2625	0
Brain	STOX1	0.2626	0
Brain	RPSAP41	0.2626	0
Brain	CADM3	0.2647	1
Brain	CASKIN1	0.2652	0
Brain	CHRM3	0.2657	0
Brain	MT3	0.2687	1
Brain	CELF4	0.2694	0
Brain	AATK	0.2694	0
Brain	CALY	0.2702	0
Brain	GAP43	0.2705	1
Brain	KIAA0319	0.271	0
Brain	FAM19A5	0.2713	1
Brain	KCNIP1	0.2714	0
Brain	ASTN1	0.2716	0
Brain	PPP2R2B	0.2738	0
Brain	DRP2	0.2744	1
Brain	KCNC1	0.2744	0
Brain	DPYSL4	0.2744	0
Brain	IGFL4	0.277	0
Brain	NRCAM	0.2771	0
Brain	RGS7BP	0.2787	0
Brain	GRIN1	0.2789	1
Brain	ATP1B2	0.279	0
Brain	HTR5A	0.2795	0
Brain	GABRB3	0.2801	0
Brain	JPH3	0.2805	0
Brain	HHIPL1	0.2805	0
Brain	GNG3	0.2813	0
Brain	RAB33A	0.2823	0
Brain	SOX2-OT	0.2838	0
Brain	SCN2A	0.2872	0
Brain	ELMOD1	0.2874	0
Brain	FAIM2	0.2875	1
Brain	NSG2	0.2875	0
Brain	SLC1A3	0.2887	0
Brain	SNPH	0.2903	0
Brain	KCTD16	0.2918	0
Brain	SH3GL2	0.2924	0
Brain	TMOD2	0.2927	0
Brain	WDR17	0.2933	0
Brain	LY6H	0.2943	1
Brain	RTP5	0.2943	0
Brain	MAPT	0.2979	0
Brain	DNM3	0.2988	0
Brain	HPCA	0.2989	0
Brain	PCDHAC2	0.2992	0
Brain	SYN1	0.3003	1
Brain	NCAM2	0.3023	0
Brain	RGS4	0.3025	0
Brain	DSCAML1	0.3035	0
Brain	GPR162	0.3052	0
Brain	EIF3EP1	0.3063	0
Brain	KCNA2	0.3096	0
Brain	SLC45A1	0.3097	0
Brain	LMCD1-AS1	0.3101	0
Brain	FAM66D	0.3103	0
Brain	FMN2	0.3107	0
Brain	TMEM132A	0.3124	0
Brain	CELF5	0.3131	0
Brain	PACSIN1	0.3139	0
Brain	SOX10	0.3154	0
Brain	MOG	0.3156	1
Brain	PRRT3	0.3157	0
Brain	MLLT11	0.3173	0
Brain	SPRN	0.3179	0
Brain	CHGB	0.318	0
Brain	DPP10	0.318	1
Brain	SYT5	0.3203	0
Brain	HS3ST4	0.321	0
Brain	PRKCG	0.3214	1
Brain	KIF5A	0.3216	0
Brain	FA2H	0.322	0
Brain	NKAIN2	0.3223	1
Brain	DLGAP1-AS4	0.3228	0
Brain	PKMP3	0.3231	0
Brain	FJX1	0.3248	0
Brain	CKMT1B	0.325	0
Brain	TPPP	0.327	0
Brain	GPM6B	0.3277	1
Brain	FBXL16	0.3286	0
Brain	TMIE	0.3299	0
Brain	PTPRR	0.3315	0
Brain	VSTM5	0.3315	0
Brain	SOGA3	0.3328	0
Brain	TCEAL2	0.3362	0
Brain	SYT3	0.3369	0
Brain	IQSEC3	0.3378	0
Brain	ADCY8	0.3386	1
Brain	PLEKHB1	0.3409	0
Brain	NKAIN1	0.3411	0
Brain	TMEM198	0.3425	0
Brain	CA7	0.3427	0
Brain	CADM3-AS1	0.3436	0
Brain	KCNS1	0.3439	1
Brain	CHL1	0.3441	0
Brain	PCDHGA11	0.3464	0
Brain	DCLK1	0.3478	0
Brain	GNAZ	0.3487	0
Brain	LINC01963	0.3489	0
Brain	CX3CR1	0.349	0
Brain	GAD1	0.35	0
Brain	FAM66B	0.3501	0
Brain	DPF1	0.3502	0
Brain	NRXN1	0.3504	0
Brain	KCNC2	0.3511	0
Brain	CNTNAP1	0.352	0
Brain	SBK1	0.3521	0
Brain	LINC01521	0.3528	0
Brain	PCDHGA9	0.3545	0
Brain	SORCS3	0.3552	0
Brain	MOBP	0.3553	1
Brain	PAX6	0.3554	0
Brain	SUSD5	0.3555	0
Brain	HPCAL4	0.3561	1
Brain	OLFM1	0.3561	1
Brain	LHFPL3	0.3561	0
Brain	DLG2	0.3573	0
Brain	CA11	0.3579	0
Brain	B4GALNT1	0.3594	0
Brain	SV2A	0.3608	0
Brain	BRINP2	0.362	1
Brain	RAB6B	0.3622	0
Brain	PRRT1	0.3625	0
Brain	AMPH	0.3626	0
Brain	TMEM74	0.3633	0
Brain	TCEAL7	0.3639	0
Brain	PNMA2	0.3663	0
Brain	NOS1AP	0.3664	0
Brain	ARHGAP36	0.3667	0
Brain	GAN	0.3671	0
Brain	KCND2	0.3691	0
Brain	TUNAR	0.3695	0
Brain	LHX2	0.3702	0
Brain	NAPB	0.371	0
Brain	SYT11	0.3716	0
Brain	NRXN3	0.3723	0
Brain	SPTBN4	0.3744	0
Brain	PCDHGA4	0.3751	0
Brain	MAGEE1	0.3766	0
Brain	PTPRD	0.3787	0
Brain	CLIP3	0.3803	0
Brain	TUBB2B	0.3811	1
Brain	PIANP	0.3841	0
Brain	PPP2R2C	0.3842	1
Brain	RAPGEFL1	0.3844	0
Brain	STXBP5L	0.3844	0
Brain	TMEM145	0.3845	0
Brain	B4GALNT4	0.3846	0
Brain	SRGAP3	0.3858	0
Brain	PAQR6	0.3864	1
Brain	KCNN3	0.387	0
Brain	MMP17	0.3877	0
Brain	DAGLA	0.3891	0
Brain	LYPD1	0.3891	0
Brain	GDAP1	0.3896	0
Brain	CNIH2	0.3945	0
Brain	MAST1	0.3955	0
Brain	ACBD7	0.3972	0
Brain	CPNE6	0.3974	1
Brain	NEXMIF	0.3986	0
Brain	FAM66C	0.4	0
Brain	ADGRB1	0.4001	1
Brain	TMEM179	0.4005	0
Brain	RFPL1	0.4017	1
Brain	EFR3B	0.4035	0
Brain	SERPINI1	0.4035	0
Brain	FZD3	0.4039	0
Brain	SYNGR3	0.4057	0
Brain	MBP	0.4066	0
Brain	LRRC4	0.4087	0
Brain	KCNMB4	0.4106	0
Brain	PEX5L	0.4114	0
Brain	GABRD	0.4116	1
Brain	PCDHGB2	0.4134	0
Brain	TTLL7	0.414	0
Brain	ADGRB2	0.415	0
Brain	SCN8A	0.415	0
Brain	GDF1	0.4158	0
Brain	C1orf61	0.4163	1
Brain	ENC1	0.4181	0
Brain	ERMN	0.4182	1
Brain	PLPPR4	0.4197	1
Brain	GRIK1	0.4214	0
Brain	PAK3	0.4215	0
Brain	PPFIA3	0.4242	0
Brain	C1QL3	0.4256	0
Brain	PRELID3A	0.4278	0
Brain	GRM7	0.429	0
Brain	TUBB2A	0.4291	0
Brain	PHACTR3	0.4314	0
Brain	KHDC1	0.4326	0
Brain	CACNA1A	0.4333	0
Brain	CACNB4	0.4343	0
Brain	CTTNBP2	0.4348	0
Brain	SLC6A11	0.4351	1
Brain	APLP1	0.4355	0
Brain	VSTM2A	0.4371	1
Brain	ARL10	0.439	0
Brain	PREX2	0.4396	0
Brain	MAP2	0.4399	0
Brain	BHLHB9	0.441	0
Brain	SATB2-AS1	0.4413	0
Brain	APBA2	0.4425	0
Brain	BSN	0.4437	0
Brain	CLIP2	0.4438	0
Brain	ADCY1	0.4444	0
Brain	NTRK2	0.4447	0
Brain	PRTFDC1	0.4448	0
Brain	RGS7	0.4457	0
Brain	ELAVL4	0.4466	0
Brain	NLGN4X	0.4468	0
Brain	CPB2-AS1	0.4482	0
Brain	NAP1L5	0.4485	0
Brain	ASIC1	0.4493	0
Brain	CHN1	0.451	0
Brain	TIAF1	0.451	0
Brain	ENO2	0.4515	0
Brain	PAQR8	0.453	0
Brain	AGAP2	0.4547	0
Brain	SULT4A1	0.4549	1
Brain	CLVS2	0.4562	1
Brain	S100B	0.4563	0
Brain	PSD	0.4565	0
Brain	SALL2	0.4567	0
Brain	PHYHIP	0.4576	1
Brain	IL17D	0.4576	0
Brain	LINC01234	0.4579	0
Brain	SYT16	0.4595	0
Brain	CNTN2	0.4608	1
Brain	CASC15	0.4618	0
Brain	DLGAP1	0.4623	0
Brain	CTNND2	0.4628	1
Brain	RPS6KL1	0.4634	0
Brain	CRMP1	0.4648	0
Brain	NELL2	0.4674	0
Brain	B4GALT6	0.4675	0
Brain	SGTB	0.4677	0
Brain	PCDHB10	0.4684	0
Brain	NLGN3	0.4688	1
Brain	LUZP2	0.4697	0
Brain	BRSK1	0.4699	0
Brain	PLP1	0.4701	1
Brain	FAM234B	0.4704	0
Brain	PIGCP1	0.4716	0
Brain	HAP1	0.4722	0
Brain	CAMK2A	0.4726	1
Brain	DLG4	0.4738	0
Brain	FGF2	0.4741	0
Brain	SCN1A	0.4761	0
Brain	KCNIP4	0.4761	0
Brain	ICA1L	0.4768	0
Brain	NRGN	0.4769	1
Brain	NPM2	0.477	0
Brain	SLC29A4	0.4776	0
Brain	ARHGAP22	0.4784	0
Brain	RNF208	0.4794	0
Brain	PRKAR1B	0.4809	0
Brain	C1orf216	0.4819	0
Brain	P2RX7	0.4831	0
Brain	AK5	0.4839	0
[truncated: 6,069 more rows]
